# Supplementary material
Source: PubMed Central journal article supplement (PMC8554800)

## **Table of Contents**

|                                                    |     |
|----------------------------------------------------|-----|
| General Information.....                           | S2  |
| Preparation and Assembly of Screening Plates.....  | S4  |
| HTE Screening General Procedures.....              | S7  |
| HTE Screen Heat-Map of Results.....                | S8  |
| Scale-up General Procedure 1 (0.1 mmol scale)..... | S9  |
| Tables of Scale-up Data.....                       | S10 |
| Scale-up General Procedure 2 (0.5 mmol scale)..... | S15 |
| Characterization data.....                         | S15 |
| References.....                                    | S27 |
| NMR Spectra.....                                   | S28 |

## General Information

All manipulations were carried out under nitrogen atmosphere inside a static dissipative acrylic isolation glovebox with iris ports provided by Abbvie for installation (TDI #60245DGSDRPIP 1/4"). DMA (*N,N*-dimethylacetamide anhydrous, 99.8%, Catalog #271012, Millipore Sigma) was purchased and used directly. Methanol solution (MeOH/DMSO 1:1 (v/v), Catalog number 650188, Millipore Sigma) was purchased and used directly for UPLC-MS plate solution. NiCl<sub>2</sub> (Millipore Sigma), NaI (Millipore Sigma), Zn flake (-325 mesh, Alfa Aesar), di-*O*-octylphthalate, 4,4'-di-*tert*-butyl-2,2'-biphenyl (dtbbpy), pyridine-2,6-*bis*(*N*-cyanocaroxamidine) (PyBCam<sup>CN</sup>), and TFA (trifluoroacetic acid, *ReagentPlus*<sup>®</sup>, 99%, catalog number T6508, Millipore Sigma) were used as received. In addition, all alkyl bromides and aryl bromides used were either commercially acquired and directly used or were procured through our internal inventory and used without any further purification.

ChemBeads were loaded according to our published procedures using glass beads (Millipore Sigma acid-washed, 212-300 μm, 50-70 U.S. sieve, catalog number G1277), in plastic 20 mL scintillation vials (Fisher part number 03-337-23A). For milling solids down to fine powders, 3 mm yttria stabilized zirconia milling balls (MSE Supplies, product number MSE-MM-YSZ-3) were used. To sieve the milled powders a 3" Sonic Sifter Separator (VWR, part number L3S50 300μm) was used. In addition, for HTE screens we used 1.8 mL glass vials (12 × 32mm, 9-425 thread, VWR, product number 46610-724) with caps from Agilent (12mm cap blue with PTFE red rubber septa, 9-425 thread, product number 5182-0717). For analysis of the screens, filtration was conducted using a 350 μL GHP 96-well filter plate (Pall Laboratories) into an LCMS plate (200 μL volume, V-bottom 96-well plate, Corning, part number 29444-102).

Additionally, zinc-coated ChemBeads were also prepared with a vortex mixer using the following method. To a 20-mL scintillation vial in a nitrogen filled glove box was weighed 7.954 g of glass ChemBeads, followed by 1.280 g of acid-washed Zn powder, then another 11.037 g glass ChemBeads for a total mass of 20.271 g (1.280 g, 0.0196 mmol Zn and 18.991 g glass ChemBeads). The vial was sealed using a plastic screw cap and electrical tape, then removed from the glove box. The vial was then placed on a conical vortex mixer to activate agitation for 15 min. The coating process appeared complete within a few minutes (no loose solid reagent visible), but in order to ensure an even coating of the solid reagent, agitation was continued for 15 min. Comparison of the masses of identical volumes of uncoated ChemBeads and Zn coated ChemBeads consistently indicated an increase in density corresponding to a loading of 4.8% Mn by mass.

Library and HTE analytical crude reaction monitoring and final product purity checks were performed on a Waters Acquity UPLC system equipped with an in-line photodiode array detector (PDA) and an SQD mass spectrometer, running MassLynx 4.1 and Openlynx 4.1 software (Waters Corporation, Milford, MA, USA). The SQD mass spectrometer was operated under positive ESI ionization conditions. The column used was a Waters BEH C8, 1.7 μm (2.1 mm × 30 mm) at a temperature of 55 °C. The following ammonium acetate analytical method was used: a gradient of 10-100% acetonitrile (A) and 10 mM ammonium acetate in water (B) was used, at a flow rate of 1.0 mL/min (0-0.1 min 10% A, 0.1-1.1 min 10-

100% A, 1.1-1.3 min 100% A, 1.3-1.4 min 100-10% A). Isolation of products from reaction mixtures was accomplished by preparative-scale reverse-phase HPLC on 2-coupled C8 5  $\mu\text{m}$  100  $\text{\AA}$  columns (30 mm  $\times$  75 mm each). When possible, an ammonium acetate purification method was used: a gradient of acetonitrile (A) and 10 mM ammonium acetate in water (B) was used, at a flow rate of 50 mL/min (0-0.5 min 5% A, 0.5-8.5 min linear gradient 05-100% A, 8.7-10.7 min 100% A, 10.7-11 min linear gradient 100-05% A). The following TFA purification method was used for samples which were not compatible with the analytical ammonium acetate method: a gradient of acetonitrile (A) and 0.1% trifluoroacetic acid in water (B) was used, at a flow rate of 50 mL/min (0-0.5 min 5% A, 0.5-8.5 min linear gradient 05-100% A, 8.7-10.7 min 100% A, 10.7-11 min linear gradient 100-05% A). Samples were injected in 2 mL DMSO:MeOH (1:1). An Agilent 1100 Series Purification system was used, consisting of the following modules: Agilent 1100 Series LC/MSD SL mass spectrometer with API-electrospray source; two Agilent 1100 Series preparative pumps; Agilent 1100 Series isocratic pump; Agilent 1100 Series diode array detector with preparative (0.3mm) flow cell; Agilent active-splitter, IFC-PAL fraction collector / autosampler. The make-up pump for the mass spectrometer used 3:1 methanol:water with 0.1% formic acid at a flow rate of 1 mL/min. Fraction collection was automatically triggered when the extracted ion chromatogram (EIC) for the target mass exceeded the threshold specified in the method. The system was controlled using Agilent Chemstation (Rev B.10.03), Agilent A2Prep, and Leap FractPal software, with custom Chemstation macros for data export.

NMR spectra were acquired on a Bruker Avance 500 MHz spectrometer with a DCH cryoprobe and a 600 MHz spectrometer, both equipped with sample changers. Chemical shifts are reported as parts per million (ppm) downfield from tetramethylsilane and referenced to solvent (e.g. DMSO- $d_6$ ). NMR data are represented as follows: chemical shift, multiplicity (s = singlet, br s = broad singlet, d = doublet, dd = doublet of doublet, t = triplet, q = quartet, m = multiplet, etc.), coupling constant, and integration. Coupling constants ( $J$ ) are given in Hertz (Hz). High-resolution mass spectrometry characterization was acquired using a Thermo Scientific™ Q Exactive™ Hybrid Quadrupole-Orbitrap high-resolution, accurate-mass (HRAM) Mass Spectrometer.

### **Preparation of BpyCAM•2HCl<sup>1,2</sup> (L13)**

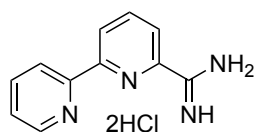

**Note:** although this compound has been reported in the literature as a mono-HCl salt, based upon EA and HRMS analysis, this ligand is a mixture of mono- and bis-HCl salts.

In a round bottomed flask, 6-cyano-2,2'-bipyridine (1 equiv) and NaOMe (2 equiv) were dissolved in MeOH and set to reflux overnight. The reaction was cooled to rt, NH<sub>4</sub>Cl (1 equiv) was added, and the reaction was heated back up to reflux and allowed to stir overnight. The reaction was cooled to rt, treated with activated carbon, and filtered. Solvent was evaporated in vacuo and the resulting powder was

recrystallized from isopropanol to give 2,2'-bipyridine-6-carboxamidinium bishydrochloride (BpyCAM•2HCl). <sup>1</sup>H NMR (500 MHz, DMSO) δ 8.84 (dt, *J* = 8.0, 1.1 Hz, 1H), 8.76 – 8.74 (m, 1H), 8.72 (d, *J* = 7.9 Hz, 1H), 8.43 – 8.40 (m, 1H), 8.30 (t, *J* = 7.9 Hz, 1H), 8.03 (td, *J* = 7.8, 1.8 Hz, 1H), 7.55 (ddd, *J* = 7.5, 4.8, 1.2 Hz, 1H); <sup>1</sup>H NMR (500 MHz, MeOD) δ 8.75 – 8.69 (m, 2H), 8.61 (d, *J* = 8.0 Hz, 1H), 8.29 – 8.19 (m, 2H), 8.01 (td, *J* = 7.8, 1.8 Hz, 1H), 7.53 (ddd, *J* = 7.6, 4.8, 1.1 Hz, 1H); <sup>13</sup>C NMR (126 MHz, DMSO) δ 162.2, 156.1, 154.1, 149.9, 144.1, 140.0, 138.0, 125.6, 125.2, 123.8, 122.3; <sup>13</sup>C NMR (126 MHz, MeOD) δ 156.5, 154.0, 149.2, 139.3, 137.6, 125.4, 124.9, 122.5, 121.9; HRMS (ESI): *m/z* calcd for C<sub>11</sub>H<sub>12</sub>N<sub>4</sub><sup>2+</sup> [*M*+2H]<sup>2+</sup>: 100.0531; found: 100.0461; elemental analysis calcd (%) for C<sub>11</sub>H<sub>12</sub>N<sub>4</sub>Cl<sub>2</sub>: C 48.73, H 4.46, N 20.66; found: C 47.09, H 4.51, N 22.16.

### **Preparation and Assembly of HTE Screening Plates**

The common reagents used for the catalytic reactions were coated on glass beads with different loadings using the Resodyn LabRAM Acoustic Mixer. The coating process took approximately 20-30 minutes at 70 times the acceleration of gravity (70G = 70% on our mixer) inside a plastic vial for NiCl<sub>2</sub>(glyme) and ligands; 60% for 30 minutes for Zn, and 50% with 5-minute intervals for NaI. The Resodyn PharmaRAM II Acoustic Mixer was also used to make ChemBeads of reagents: 10 min at 70G for NiCl<sub>2</sub> glyme, ligands, and Zn; 10 min at 50G for NaI. To be successful, the ligands and NaI needed to first be milled down to a fine powder for the coating process. Milling can be done with the LabRAM instrument and the process took approximately 20-30 minutes at 40-45G inside a plastic vial. The milled material was sieved to load onto the glass beads. The loadings for each reagent are as follow: **NiCl<sub>2</sub>(glyme)** (3% loading w/w), **NaI** (3% loading w/w), **Zn flake** (10% loading w/w), **Ligand 1** (PyBCam<sup>CN</sup>, 3% loading w/w), **Ligand 10** (dtbbpy, 3% loading w/w), **Ligand 13** (*[2,2'-bipyridine]-6-carboximidamide hydrochloride*, BpyCam•HCl, 3% loading w/w).

All screening plates were prepared using the Chemspeed SWAVE that was modified internally to dispense ChemBeads to 1.8 mL glass vials. The program used to do the dispensing is also an internally modified version of the Chemspeed software.

Using the Chemspeed SWAVE under nitrogen atmosphere, a 48-well metal block with 37 1.8 mL vials was charged with NiCl<sub>2</sub>(glyme) ChemBeads, **Ligand 1** ChemBeads, Zn ChemBeads, and NaI ChemBeads. Two more sets were made using **Ligand 10** ChemBeads and **Ligand 13** ChemBeads in place of **Ligand 1** ChemBeads, keeping the other variables the same. In total 27 sets were made. The plates were stored in a glovebox under nitrogen atmosphere prior to use.

**Alkyl halide monomers**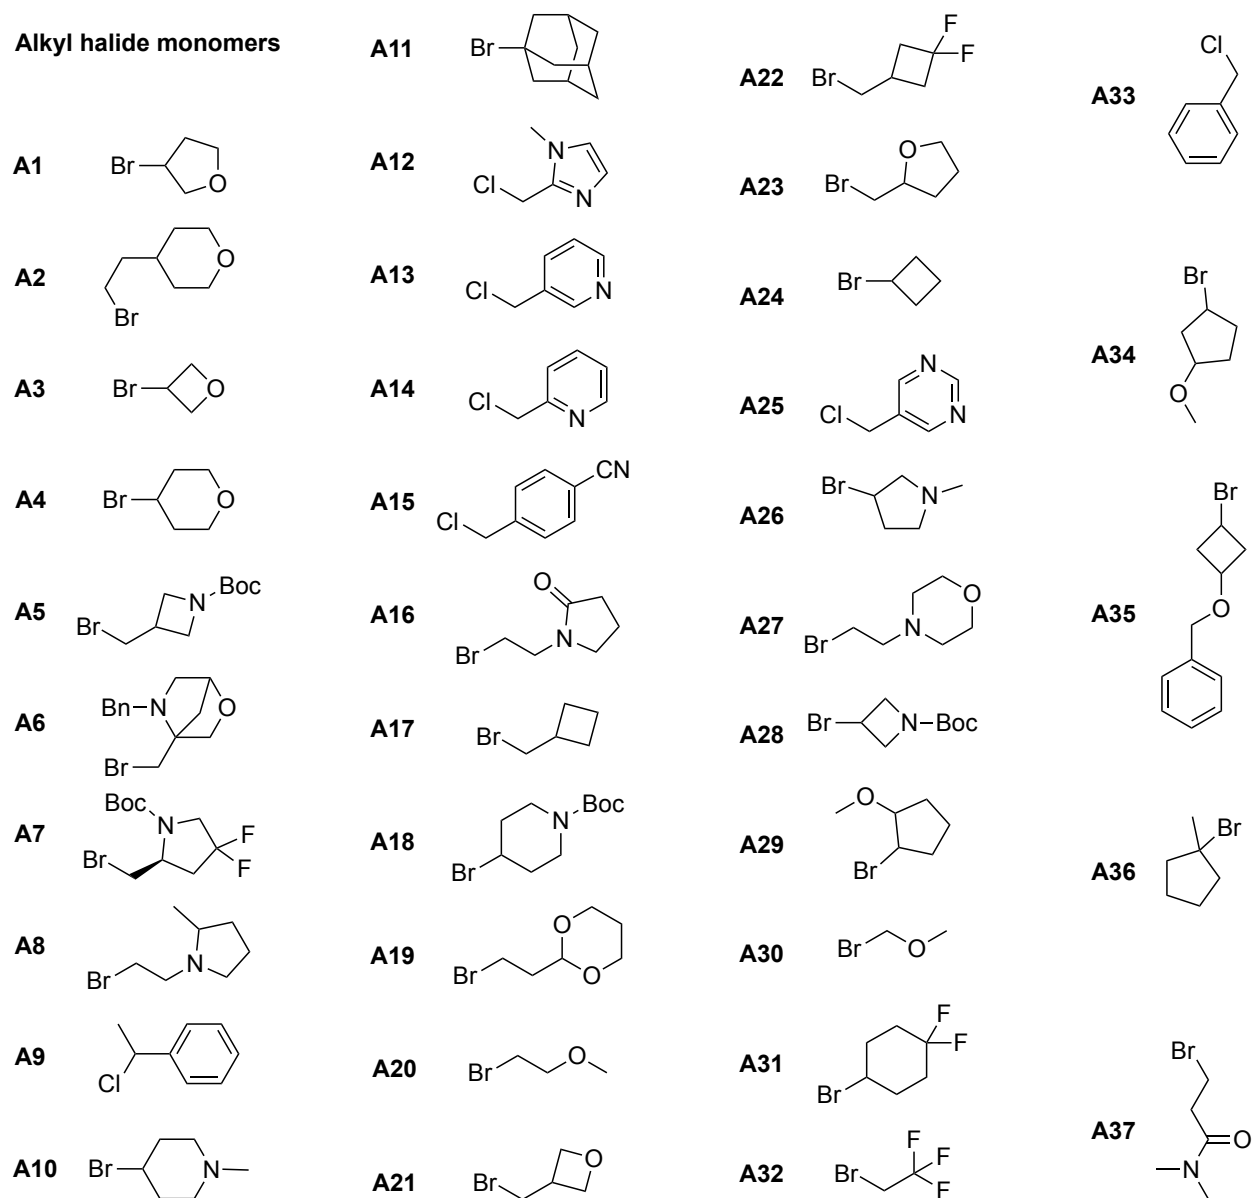**Alkyl Bromide Monomer Stock Solutions**

There were 37 alkyl bromide monomers used to screen each of the 6 aryl bromides in a high throughput experimentation manner. For each alkyl bromide, 1.0 mmol was weighed out and placed in a 4 mL vial with septa cap. The headspace was purged inside the glovebox before anhydrous DMA (1 mL) was added and the mixture stirred until complete dissolution.

## Aryl Bromide Stock Solutions

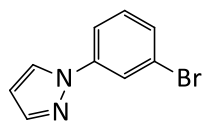

Core 1

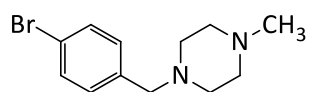

Core 2

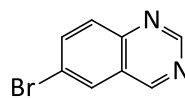

Core 3

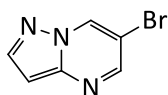

Core 4

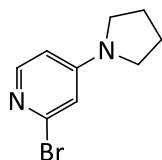

Core 5

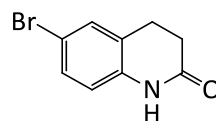

Core 6

Six aryl bromides were used for the high throughput experimentation. In each case, aryl bromide (0.6 mmol) was placed in a 4 mL vial and the vial was moved into the inert-atmosphere glovebox. The aryl bromides were diluted with anhydrous DMA (3.33 mL).

## HTE Screening General Procedure

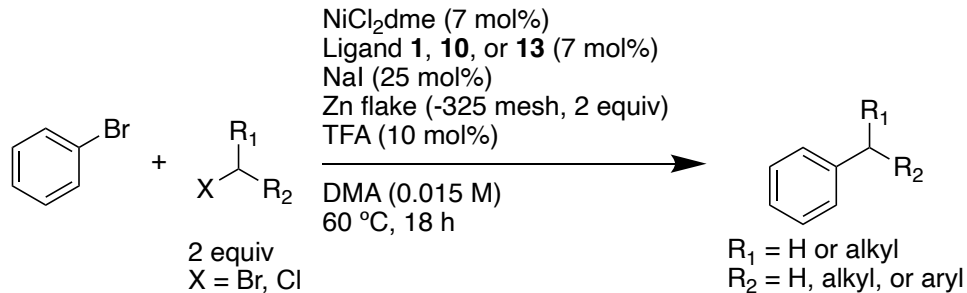

Pre-plated set: 37 × 1.8 mL glass vials were charged with NiCl<sub>2</sub>(glyme), NaI, Zn, and ligand (**Ligand 1**, **Ligand 10**, or **Ligand 13**) on ChemBeads using a Chemspeed SWAVE system.

Using the purge box, to the screening plate vials, 10 μL of the pre-weighed 4 mL vial of the alkyl bromide stock solution in DMA (anhydrous, 0.02 mmol, 2 equiv) was added to their corresponding vial in sequence followed by 30 μL of the aryl bromide core stock solution (0.01 mmol, 1 equiv, 0.18 M). To each vial was added 10 μL of a 0.1 M solution of trifluoroacetic acid (5.4 μmol, 10 mol%) in DMA. The vials were capped and placed on the heater/shaker (Torrey Pines Echotherm) at 60°C on setting 7 to heat/shake overnight. Upon completion, the vials on the metal block were placed on a Tecan EVO instrument to assemble the UPLC analysis plate. To each vial a calculated amount of internal standard, di-*N*-octyl phthalate (0.003 mmol, 0.5 equiv), in a 0.01 M solution in methanol was added. This was diluted with DMSO/MeOH (1:1 v/v) to achieve 500 μL as a total volume. To a 350 μL GHP 96-well filter plate with a 200 μL volume V-bottom 96-well plate, 75 μL of the solution is added with an additional 75 μL of DMSO/MeOH (1:1 v/v). The filter plate and 96-well regular plate were centrifuged together in a speed vac for 5 min. The resulting sample plate was placed in the UPLC for analysis using either the AA method or the TFA method depending on the substrate.

## Heat-Map of HTE Results by Ligand and Core

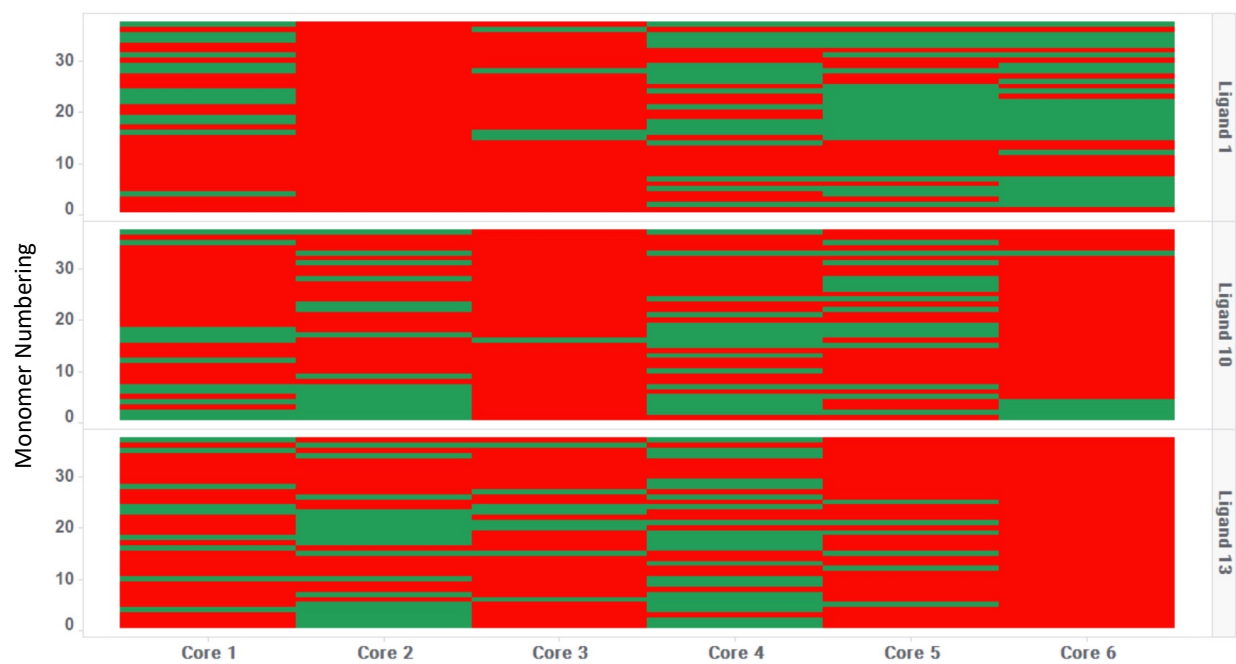

Red denotes no product ion detected, green denotes product ion detected.



### Scale-Up General Procedure 1 for C(sp<sup>2</sup>)-C(sp<sup>3</sup>) Coupling on 0.1 mmol Scale

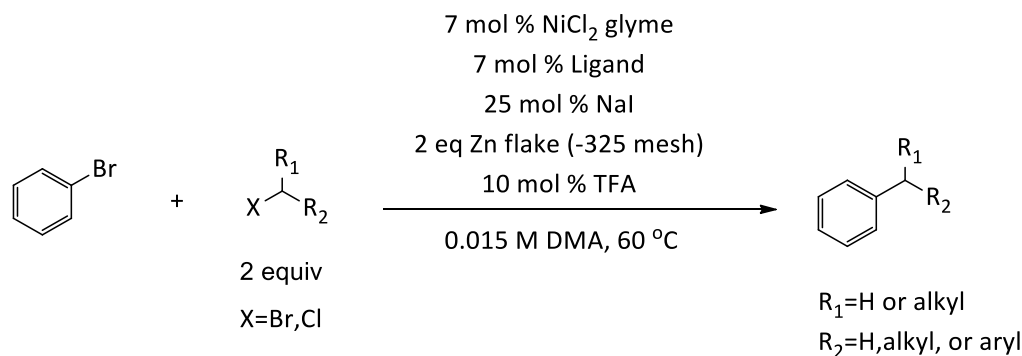

A 4 mL scintillation vial was charged with a stir bar, NiCl<sub>2</sub>•glyme (0.007 mmol, 7 mol%), NaI (0.25 mmol, 25 mol%), Ligand (**1**, **10**, or **13**) (0.007 mmol, 7 mol%), and Zn flake (0.2 mmol, 2 equiv). The vial was moved into a nitrogen atmosphere dry box and 100 μL of a 2 M stock solution of alkyl halide in DMA (0.2 mmol, 2 equiv). To this, 300 μL of a 0.333 M DMA stock solution of the aryl bromide core (0.1 mmol, 1 equiv) was added followed by the addition of trifluoroacetic acid (0.01 mmol, 10 mol%). The vial was capped using a septa cap (National Scientific, catalog number C4015-75A) and placed to heat at 60 °C for 18 h using a 4 mL deep well plate on the heater/shaker (Torrey Pines Echotherm) at setting 7. Upon completion the reaction was passed through a syringe filter using a 3 mL syringe with a Whatman 20-micron PTFE filter disc and washed with 1 mL of DMA, then dried under N<sub>2</sub> line. The crude mixture was dissolved in 1.8 mL of DMSO and purified using reverse phase HPLC to afford the final product.

It is important to note that the ChemBeads version of the reagents used were also employed in the scale ups. There was no difference in reactivity between ChemBeads reagents versus non ChemBeads reagents. The ChemBeads loadings for the scale up reactions are the same as the screens with the only difference being in NaI where the loading was 20% w/w loading rather than 3% w/w loading.

Note that 27 of the products were isolated and fully characterized (vide infra).

**Products isolated in >95% purity**

| Alkyl # | Core # | Ligand    | Product   | MW       | Isolated Yield (%) | Purity | RT (min) EIC | LCMS (M+H) |
|---------|--------|-----------|-----------|----------|--------------------|--------|--------------|------------|
| 1       | Core 1 | Ligand 10 | <b>1</b>  | 214.2631 | 11                 | >95%   | 0.6263       | 215.1      |
| 2       | Core 1 | Ligand 10 | <b>2</b>  | 256.3428 | 27                 | >95%   | 0.7379       | 257.2      |
| 4       | Core 1 | Ligand 1  | <b>4</b>  | 228.2896 | 4                  | >95%   | 0.47         | 229.1      |
| 4       | Core 1 | Ligand 13 | <b>4</b>  | 228.2896 | 12                 | >95%   | 0.6927       | 229.1      |
| 7       | Core 1 | Ligand 10 | <b>7</b>  | 363.4016 | 13                 | >95%   | 0.8276       | 364.2      |
| 10      | Core 1 | Ligand 13 | <b>10</b> | 241.3315 | 3                  | >95%   | 0.5034       | 242.2      |
| 16      | Core 1 | Ligand 1  | <b>16</b> | 255.315  | 2                  | >95%   | 0.62         | 256.2      |
| 16      | Core 1 | Ligand 10 | <b>16</b> | 255.315  | 15                 | >95%   | 0.5877       | 256.1      |
| 16      | Core 1 | Ligand 13 | <b>16</b> | 255.315  | 3                  | >95%   | 0.6113       | 256.2      |
| 17      | Core 1 | Ligand 10 | <b>17</b> | 212.2902 | 25                 | >95%   | 0.8238       | 213.1      |
| 18      | Core 1 | Ligand 1  | <b>18</b> | 327.4207 | 2                  | >95%   | 0.88         | 328.4      |
| 18      | Core 1 | Ligand 10 | <b>18</b> | 327.4207 | 12                 | >95%   | 0.8327       | 328.3      |
| 19      | Core 1 | Ligand 1  | <b>19</b> | 258.3156 | 8                  | >95%   | 0.72         | 259.2      |
| 19      | Core 1 | Ligand 13 | <b>19</b> | 258.3156 | 9                  | >95%   | 0.71         | 259.2      |
| 23      | Core 1 | Ligand 1  | <b>23</b> | 228.2896 | 9                  | >95%   | 0.715        | 229.2      |
| 23      | Core 1 | Ligand 13 | <b>23</b> | 228.2896 | 27                 | >95%   | 0.7172       | 229.2      |
| 24      | Core 1 | Ligand 1  | <b>24</b> | 198.2637 | 15                 | >95%   | 0.85         | 199.1      |
| 24      | Core 1 | Ligand 13 | <b>24</b> | 198.2637 | 28                 | >95%   | 0.8027       | 199.2      |
| 31      | Core 1 | Ligand 1  | <b>31</b> | 262.2978 | 8                  | >95%   | 0.8483       | 262.9      |
| 35      | Core 1 | Ligand 13 | <b>35</b> | 304.3856 | 6                  | >95%   | 0.8906       | 305.2      |
| 37      | Core 1 | Ligand 13 | <b>37</b> | 243.3043 | 3                  | >95%   | 0.611        | 244.2      |
| 1       | Core 2 | Ligand 10 | <b>38</b> | 260.3746 | 14                 | >95%   | 0.4077       | 261.3      |
| 2       | Core 2 | Ligand 10 | <b>39</b> | 302.4543 | 5                  | >95%   | 0.4894       | 303.3      |
| 3       | Core 2 | Ligand 13 | <b>40</b> | 246.348  | 17                 | >95%   | 0.3723       | 247.3      |
| 4       | Core 2 | Ligand 13 | <b>41</b> | 274.4011 | 26                 | >95%   | 0.5322       | 275.3      |
| 5       | Core 2 | Ligand 10 | <b>42</b> | 359.5056 | 10                 | >95%   | 0.5533       | 360.3      |
| 7       | Core 2 | Ligand 10 | <b>44</b> | 409.5131 | 6                  | >95%   | 0.6008       | 410.3      |
| 16      | Core 2 | Ligand 10 | <b>53</b> | 301.4265 | 6                  | >95%   | 0.4898       | 302.3      |
| 17      | Core 2 | Ligand 10 | <b>54</b> | 258.4017 | 14                 | >95%   | 0.4549       | 259.2      |
| 17      | Core 2 | Ligand 13 | <b>54</b> | 258.4017 | 11                 | >95%   | 0.5606       | 259.3      |
| 18      | Core 2 | Ligand 13 | <b>55</b> | 373.5322 | 6                  | >95%   | 0.5646       | 374.4      |
| 20      | Core 2 | Ligand 13 | <b>57</b> | 248.3639 | 26                 | >95%   | 0.4063       | 248.5      |
| 21      | Core 2 | Ligand 13 | <b>58</b> | 260.3746 | 14                 | >95%   | 0.401        | 261.3      |
| 22      | Core 2 | Ligand 10 | <b>59</b> | 294.3827 | 13                 | >95%   | 0.5236       | 295.2      |
| 22      | Core 2 | Ligand 13 | <b>59</b> | 294.3827 | 18                 | >95%   | 0.5006       | 295        |
| 23      | Core 2 | Ligand 13 | <b>60</b> | 274.4011 | 19                 | >95%   | 0.5692       | 247.3      |
| 24      | Core 2 | Ligand 10 | <b>61</b> | 244.3752 | 25                 | >95%   | 0.6748       | 244.9      |
| 28      | Core 2 | Ligand 10 | <b>65</b> | 345.479  | 13                 | >95%   | 0.5236       | 346.2      |
| 31      | Core 2 | Ligand 10 | <b>68</b> | 308.4093 | 8                  | >95%   | 0.5236       | 309.2      |
| 33      | Core 2 | Ligand 1  | <b>70</b> | 280.4073 | 2                  | >95%   | 0.472        | 281.3      |

| Alkyl # | Core # | Ligand    | Product    | MW       | Isolated Yield (%) | Purity | RT (min) EIC | LCMS (M+H) |
|---------|--------|-----------|------------|----------|--------------------|--------|--------------|------------|
| 15      | Core 3 | Ligand 1  | <b>89</b>  | 245.2786 | 8                  | >95%   | 0.66         | 246.3      |
| 16      | Core 3 | Ligand 1  | <b>90</b>  | 241.2884 | 9                  | >95%   | 0.413        | 242.1      |
| 16      | Core 3 | Ligand 10 | <b>90</b>  | 241.2884 | 23                 | >95%   | 0.4302       | 242.1      |
| 20      | Core 3 | Ligand 13 | <b>94</b>  | 188.2258 | 9                  | >95%   | 0.5185       | 189.1      |
| 21      | Core 3 | Ligand 13 | <b>95</b>  | 200.2365 | 9                  | >95%   | 0.5013       | 201.2      |
| 24      | Core 3 | Ligand 13 | <b>98</b>  | 184.2371 | 28                 | >95%   | 0.6827       | 185.2      |
| 1       | Core 4 | Ligand 13 | <b>112</b> | 189.2138 | 23                 | >95%   | 0.474        | 190.1      |
| 2       | Core 4 | Ligand 10 | <b>113</b> | 231.2936 | 10                 | >95%   | 0.5687       | 232.2      |
| 2       | Core 4 | Ligand 13 | <b>113</b> | 231.2936 | 34                 | >95%   | 0.5686       | 232.1      |
| 4       | Core 4 | Ligand 13 | <b>115</b> | 203.2404 | 5                  | >95%   | 0.487        | 204.1      |
| 5       | Core 4 | Ligand 1  | <b>116</b> | 288.3449 | 1                  | >95%   | 0.6592       | 289.2      |
| 5       | Core 4 | Ligand 10 | <b>116</b> | 288.3449 | 7                  | >95%   | 0.6591       | 289.1      |
| 5       | Core 4 | Ligand 13 | <b>116</b> | 288.3449 | 12                 | >95%   | 0.4652       | 289.2      |
| 7       | Core 4 | Ligand 10 | <b>118</b> | 338.3524 | 7                  | >95%   | 0.6974       | 319.1      |
| 7       | Core 4 | Ligand 13 | <b>118</b> | 338.3524 | 25                 | >95%   | 0.6978       | 339.2      |
| 9       | Core 4 | Ligand 13 | <b>120</b> | 223.2731 | 17                 | >95%   | 0.6849       | 224.2      |
| 16      | Core 4 | Ligand 1  | <b>127</b> | 230.2658 | 9                  | >95%   | 0.4436       | 231.1      |
| 17      | Core 4 | Ligand 1  | <b>128</b> | 187.241  | 20                 | >95%   | 0.4426       | 188.1      |
| 17      | Core 4 | Ligand 13 | <b>128</b> | 187.241  | 10                 | >95%   | 0.6503       | 188.1      |
| 18      | Core 4 | Ligand 1  | <b>129</b> | 302.3715 | 6                  | >95%   | 0.7021       | 303.3      |
| 18      | Core 4 | Ligand 10 | <b>129</b> | 302.3715 | 15                 | >95%   | 0.7022       | 303.1      |
| 18      | Core 4 | Ligand 13 | <b>129</b> | 302.3715 | 5                  | >95%   | 0.7024       | 303.1      |
| 19      | Core 4 | Ligand 10 | <b>130</b> | 233.2664 | 32                 | >95%   | 0.5127       | 234.2      |
| 19      | Core 4 | Ligand 13 | <b>130</b> | 233.2664 | 13                 | >95%   | 0.5128       | 234.2      |
| 21      | Core 4 | Ligand 1  | <b>132</b> | 189.2138 | 5                  | >95%   | 0.4264       | 190.1      |
| 21      | Core 4 | Ligand 13 | <b>132</b> | 189.2138 | 4                  | >95%   | 0.1289       | 190.1      |
| 24      | Core 4 | Ligand 10 | <b>135</b> | 173.2144 | 17                 | >95%   | 0.5857       | 174.1      |
| 28      | Core 4 | Ligand 1  | <b>139</b> | 274.3183 | 3                  | >95%   | 0.6285       | 275.4      |
| 29      | Core 4 | Ligand 1  | <b>140</b> | 217.267  | 15                 | >95%   | 0.5902       | 218.1      |
| 33      | Core 4 | Ligand 10 | <b>144</b> | 209.2465 | 9                  | >95%   | 0.6331       | 210.1      |
| 34      | Core 4 | Ligand 1  | <b>145</b> | 217.267  | 7                  | >95%   | 0.5601       | 218.2      |
| 34      | Core 4 | Ligand 13 | <b>145</b> | 217.267  | 5                  | >95%   | 0.5772       | 218.2      |
| 35      | Core 4 | Ligand 1  | <b>146</b> | 279.3364 | 8                  | >95%   | 0.698        | 280.2      |
| 37      | Core 4 | Ligand 1  | <b>148</b> | 218.2551 | 8                  | >95%   | 0.448        | 219.2      |
| 37      | Core 4 | Ligand 10 | <b>148</b> | 218.2551 | 1                  | >95%   | 0.4512       | 219.2      |
| 37      | Core 4 | Ligand 13 | <b>148</b> | 218.2551 | 30                 | >95%   | 0.448        | 219.1      |
| 4       | Core 5 | Ligand 1  | <b>152</b> | 232.3214 | 12                 | >95%   | 0.472        | 233.2      |
| 5       | Core 5 | Ligand 1  | <b>153</b> | 317.4259 | 4                  | >95%   | 0.631        | 318.2      |
| 5       | Core 5 | Ligand 10 | <b>153</b> | 317.4259 | 49                 | >95%   | 0.5923       | 318.3      |
| 5       | Core 5 | Ligand 13 | <b>153</b> | 317.4259 | 11                 | >95%   | 0.6352       | 318.3      |

| Alkyl # | Core # | Ligand    | Product    | MW       | Isolated Yield (%) | Purity | RT (min)<br>EIC | LCMS<br>(M+H) |
|---------|--------|-----------|------------|----------|--------------------|--------|-----------------|---------------|
| 7       | Core 5 | Ligand 1  | <b>155</b> | 367.4334 | 12                 | >95%   | 0.6995          | 368.3         |
| 7       | Core 5 | Ligand 10 | <b>155</b> | 367.4334 | 22                 | >95%   | 0.648           | 368.3         |
| 15      | Core 5 | Ligand 10 | <b>163</b> | 263.337  | 11                 | >95%   | 0.5451          | 264.2         |
| 16      | Core 5 | Ligand 1  | <b>164</b> | 259.3467 | 9                  | >95%   | 0.4078          | 260.2         |
| 17      | Core 5 | Ligand 10 | <b>165</b> | 216.322  | 45                 | >95%   | 0.588           | 217.2         |
| 18      | Core 5 | Ligand 1  | <b>166</b> | 331.4525 | 9                  | >95%   | 0.6694          | 332.3         |
| 19      | Core 5 | Ligand 1  | <b>167</b> | 262.3474 | 36                 | >95%   | 0.515           | 263.2         |
| 19      | Core 5 | Ligand 10 | <b>167</b> | 262.3474 | 44                 | >95%   | 0.502           | 263.2         |
| 19      | Core 5 | Ligand 13 | <b>167</b> | 262.3474 | 18                 | >95%   | 0.5107          | 263.1         |
| 22      | Core 5 | Ligand 10 | <b>170</b> | 252.3029 | 29                 | >95%   | 0.5535          | 253.2         |
| 23      | Core 5 | Ligand 1  | <b>171</b> | 232.3214 | 23                 | >95%   | 0.4979          | 233.2         |
| 24      | Core 5 | Ligand 1  | <b>172</b> | 202.2954 | 24                 | >95%   | 0.5493          | 202.9         |
| 24      | Core 5 | Ligand 10 | <b>172</b> | 202.2954 | 12                 | >95%   | 0.5322          | 203.2         |
| 28      | Core 5 | Ligand 1  | <b>176</b> | 303.3993 | 12                 | >95%   | 0.6525          | 304.2         |
| 28      | Core 5 | Ligand 10 | <b>176</b> | 303.3993 | 29                 | >95%   |                 |               |
| 31      | Core 5 | Ligand 10 | <b>179</b> | 266.3295 | 6                  | >95%   | 0.5709          | 267.2         |
| 33      | Core 5 | Ligand 1  | <b>181</b> | 238.3275 | 4                  | >95%   | 0.5408          | 247.2         |
| 33      | Core 5 | Ligand 10 | <b>181</b> | 238.3275 | 25                 | >95%   | 0.575           | 239.1         |
| 35      | Core 5 | Ligand 1  | <b>183</b> | 308.4174 | 22                 | >95%   | 0.6653          | 309.6         |
| 35      | Core 5 | Ligand 10 | <b>183</b> | 308.4174 | 18                 | >95%   | 0.6266          | 309.2         |
| 29      | Core 6 | Ligand 1  | <b>214</b> | 245.3169 | 13                 | >95%   | 0.6278          | 246.1         |
| 31      | Core 6 | Ligand 1  | <b>216</b> | 265.2984 | 8                  | >95%   | 0.6875          | 266.1         |
| 33      | Core 6 | Ligand 1  | <b>218</b> | 237.2964 | 2                  | >95%   | 0.692           | 238.2         |
| 35      | Core 6 | Ligand 1  | <b>220</b> | 307.3862 | 27                 | >95%   | 0.7351          | 308.2         |
| 37      | Core 6 | Ligand 1  | <b>222</b> | 246.3049 | 2                  | >95%   | 0.486           | 247.2         |

**Products isolated in <95% purity**

| <b>Alkyl #</b> | <b>Core #</b> | <b>Ligand</b> | <b>Product</b> | <b>MW</b> | <b>Isolated Yield-Scale up (after cleanup)</b> | <b>Estimated Purity</b> |
|----------------|---------------|---------------|----------------|-----------|------------------------------------------------|-------------------------|
| 18             | Core 1        | Ligand 13     | <b>18</b>      | 327.4207  | 5                                              | ~50%                    |
| 34             | Core 1        | Ligand 1      | <b>34</b>      | 242.3162  | 5.6                                            | ~25%                    |
| 35             | Core 1        | Ligand 1      | <b>35</b>      | 304.3856  | 25                                             | ~50%                    |
| 1              | Core 2        | Ligand 13     | <b>38</b>      | 260.3746  | 35                                             | ~80%                    |
| 4              | Core 2        | Ligand 10     | <b>41</b>      | 274.4011  | 10                                             | ~78%                    |
| 9              | Core 2        | Ligand 10     | <b>46</b>      | 294.4338  | 9                                              | ~85%                    |
| 19             | Core 2        | Ligand 13     | <b>56</b>      | 304.4271  | 29                                             | 85%                     |
| 23             | Core 2        | Ligand 10     | <b>60</b>      | 274.4011  | 49                                             | ~85%                    |
| 33             | Core 2        | Ligand 10     | <b>70</b>      | 280.4073  | 12                                             | ~47%                    |
| 36             | Core 2        | Ligand 13     | <b>73</b>      | 272.4283  | 12                                             | ~50%                    |
| 37             | Core 2        | Ligand 10     | <b>74</b>      | 289.4158  | 11                                             | ~70%                    |
| 23             | Core 3        | Ligand 13     | <b>97</b>      | 214.2631  | 41.6                                           | ~25%                    |
| 36             | Core 3        | Ligand 1      | <b>110</b>     | 212.2902  | 20                                             | ~50%                    |
| 4              | Core 4        | Ligand 10     | <b>115</b>     | 203.2404  | 8                                              | ~70%                    |
| 15             | Core 4        | Ligand 10     | <b>126</b>     | 234.256   | 8.3                                            | ~70%                    |
| 16             | Core 4        | Ligand 10     | <b>127</b>     | 230.2658  | 11.2                                           | ~70%                    |
| 16             | Core 4        | Ligand 13     | <b>127</b>     | 230.2658  | 8.8                                            | ~75%                    |
| 17             | Core 4        | Ligand 10     | <b>128</b>     | 187.241   | 13.6                                           | 75%                     |
| 21             | Core 4        | Ligand 10     | <b>132</b>     | 189.2138  | 10.4                                           | ~50%                    |
| 28             | Core 4        | Ligand 13     | <b>139</b>     | 274.3183  | 13.6                                           | 60%/40%                 |
| 29             | Core 4        | Ligand 13     | <b>140</b>     | 217.267   | 12.8                                           | ~50%                    |
| 17             | Core 5        | Ligand 1      | <b>165</b>     | 216.322   | 22.4                                           | ~70%                    |
| 18             | Core 5        | Ligand 10     | <b>166</b>     | 331.4525  | 6.2                                            | ~60%                    |
| 20             | Core 5        | Ligand 1      | <b>168</b>     | 206.2841  | 9.8                                            | ~80%                    |
| 21             | Core 5        | Ligand 1      | <b>169</b>     | 218.2948  | 7.2                                            | ~80%                    |
| 21             | Core 5        | Ligand 13     | <b>169</b>     | 218.2948  | 20                                             | ~40%                    |
| 25             | Core 5        | Ligand 13     | <b>173</b>     | 240.3036  | 5.5                                            | ~40%                    |
| 31             | Core 5        | Ligand 1      | <b>179</b>     | 266.3295  | 1.6                                            | ~50%                    |
| 37             | Core 5        | Ligand 1      | <b>185</b>     | 247.336   | 6.2                                            | ~70%                    |
| 34             | Core 6        | Ligand 1      | <b>219</b>     | 245.3169  | 34                                             | ~40%                    |

**Products that could not be isolated**

| <b>Alkyl #</b> | <b>Core #</b> | <b>Ligand</b> | <b>Product</b> | <b>MW</b> |
|----------------|---------------|---------------|----------------|-----------|
| 5              | Core 1        | Ligand 1      | 5              | 313.3941  |
| 17             | Core 1        | Ligand 1      | 17             | 212.2902  |
| 20             | Core 1        | Ligand 1      | 20             | 202.2524  |
| 26             | Core 1        | Ligand 1      | 26             | 227.3049  |
| 26             | Core 1        | Ligand 10     | 26             | 227.3049  |
| 28             | Core 1        | Ligand 10     | 28             | 299.3675  |
| 2              | Core 1        | Ligand 13     | 2              | 256.3428  |
| 5              | Core 1        | Ligand 13     | 5              | 313.3941  |
| 7              | Core 1        | Ligand 13     | 7              | 363.4016  |
| 12             | Core 1        | Ligand 13     | 12             | 238.2878  |
| 17             | Core 1        | Ligand 13     | 17             | 212.2902  |
| 20             | Core 1        | Ligand 13     | 20             | 202.2524  |
| 22             | Core 1        | Ligand 13     | 22             | 248.2712  |
| 26             | Core 1        | Ligand 13     | 26             | 227.3049  |
| 33             | Core 1        | Ligand 13     | 33             | 234.2958  |
| 7              | Core 2        | Ligand 1      | 44             | 409.5131  |
| 11             | Core 2        | Ligand 13     | 48             | 324.5029  |
| 13             | Core 2        | Ligand 13     | 50             | 281.3953  |
| 14             | Core 2        | Ligand 13     | 51             | 281.3953  |
| 16             | Core 2        | Ligand 13     | 53             | 301.4265  |
| 24             | Core 2        | Ligand 13     | 61             | 244.3752  |
| 31             | Core 2        | Ligand 13     | 68             | 308.4093  |
| 35             | Core 2        | Ligand 13     | 72             | 350.4971  |
| 37             | Core 2        | Ligand 13     | 74             | 289.4158  |
| 12             | Core 5        | Ligand 1      | 160            | 242.3195  |
| 33             | Core 5        | Ligand 13     | 181            | 238.3275  |
| 23             | Core 6        | Ligand 1      | 208            | 231.2903  |
| 5              | Core 6        | Ligand 10     | 190            | 316.3948  |
| 16             | Core 6        | Ligand 10     | 201            | 258.3156  |

### Scale-Up General Procedure 2 for C(sp<sup>2</sup>)-C(sp<sup>3</sup>) Coupling at 0.5 mmol Scale

In a N<sub>2</sub> filled glove box, a catalyst stock solution was made by charging an oven dried 1-dram vial with NiCl<sub>2</sub>•glyme (38.5 mg, 0.175 mmol), **Ligand 13** (41.0 mg, 0.151 mmol), a PTFE-coated stir bar, and DMA (4 mL). The vial was stirred at rt for 15 min.

Into a separate 1-dram vial was added the aryl bromide core and the alkyl halide (0.50 mmol each), NaI (*if necessary*, 18.7 mg, 0.125 mmol, 25 mol %), and Zn flake (65.4 mg, 1.0 mmol, 2 equiv). To this was added 800 μL (0.030 mmol, 0.06 equiv, 6 mol%) of the catalyst stock solution. The vial was capped using a PTFE septa cap and stir at 40 °C for 18 h. After the 18 h, the reaction mixture was diluted with NaOH<sub>aq</sub> (2 M, 20 mL) and extracted into DCM (3 × 20 mL). The combined organic layers were dried over Na<sub>2</sub>SO<sub>4</sub>, filtered, and the filtrate was concentrated in vacuo. The residue was purified by flash column chromatography.

### Characterization Data

#### **1-(3-(2-(tetrahydro-2H-pyran-4-yl)ethyl)phenyl)-1H-pyrazole (2)**

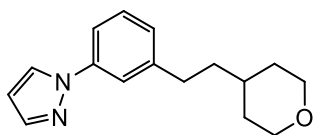

General procedure 1 was followed using 1-(3-bromophenyl)-1H-pyrazole (**Core 1**, 22.31 mg, 0.10 mmol) as the aryl halide, 4-(2-bromoethyl)tetrahydro-2H-pyran (**A2**, 38.62 mg, 0.20 mmol) as the alkyl reagent, and **Ligand 10** (1.88 mg, 0.01 mmol). After the reaction was complete, the reaction was concentrated under a stream of dinitrogen. The crude residue was dissolved in DMA and filtered through Celite. The product was purified by reverse phase HPLC using ammonium acetate conditions and a focused gradient to afford the title compound (**2**) (6.9 mg, 27% yield, >90% pure by <sup>1</sup>H NMR). <sup>1</sup>H NMR (400 MHz, DMSO) δ 8.33 (d, J = 2.4 Hz, 1H), 7.68 (d, J = 1.8 Hz, 1H), 7.64 (t, J = 2.0 Hz, 1H), 7.58 (ddd, J = 8.1, 2.4, 1.0 Hz, 1H), 7.36 (t, J = 7.8 Hz, 1H), 7.13 (dt, J = 7.8, 1.3 Hz, 1H), 6.48 (dd, J = 2.5, 1.7 Hz, 1H), 3.82 (ddd, J = 11.1, 4.3, 2.1 Hz, 2H), 3.27 (td, J = 11.6, 2.2 Hz, 2H), 2.71 – 2.65 (m, 2H), 1.67 – 1.61 (m, 2H), 1.61 – 1.56 (m, 2H), 1.56 – 1.48 (m, 1H), 1.28 – 1.17 (m, 2H). <sup>13</sup>C NMR (101 MHz, DMSO) δ 144.5, 141.2, 140.2, 129.8, 128.1, 126.6, 118.7, 116.3, 108.2, 67.5, 38.6, 34.5, 33.1, 32.4. HRMS (ESI+): *m/z* calcd for C<sub>16</sub>H<sub>21</sub>N<sub>2</sub>O<sup>+</sup>: 257.1648 [M+H]<sup>+</sup>; found: 257.1652.

#### **1-(3-(1H-pyrazol-1-yl)phenethyl)pyrrolidin-2-one (16)**

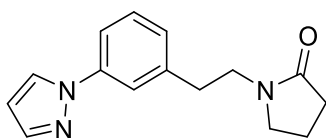

General procedure 1 was followed using 1-(3-bromophenyl)-1H-pyrazole (**Core 1**, 55.8 mg, 0.25 mmol) as the aryl halide, 1-(2-bromoethyl)pyrrolidin-2-one (**A16**, 96.0 mg, 0.5 mmol) as the alkyl reagent, and **Ligand 13** (4.10 mg, 0.02 mmol). After the reaction was complete, the reaction was concentrated under a stream of dinitrogen. The crude residue was dissolved in DMA and filtered through Celite. The product was purified by reverse phase HPLC using ammonium acetate conditions and a focused gradient to afford the title compound (**16**) (11 mg, 17 % yield, >90% pure by  $^1\text{H}$  NMR)  $^1\text{H}$  NMR (400 MHz, DMSO)  $\delta$  8.34 (d,  $J$  = 2.5 Hz, 1H), 7.70 – 7.67 (m, 2H), 7.63 (ddd,  $J$  = 8.1, 2.3, 1.0 Hz, 1H), 7.38 (t,  $J$  = 7.8 Hz, 1H), 7.15 (dt,  $J$  = 7.7, 1.3 Hz, 1H), 6.49 (dd,  $J$  = 2.5, 1.7 Hz, 1H), 3.47 (dd,  $J$  = 7.8, 6.7 Hz, 2H), 3.34 – 3.26 (m, 2H), 2.86 (t,  $J$  = 7.3 Hz, 2H), 2.16 (t,  $J$  = 8.1 Hz, 2H), 1.94 – 1.82 (m, 2H).  $^{13}\text{C}$  NMR (101 MHz, DMSO)  $\delta$  174.2, 141.2, 141.3, 140.2, 129.9, 128.1, 126.9, 119.0, 116.7, 108.2, 46.9, 43.4, 33.3, 30.9, 18.0. HRMS (ESI+):  $m/z$  calcd for  $\text{C}_{15}\text{H}_{18}\text{N}_3\text{O}^+$ : 257.1444 [M+H] $^+$ ; found: 256.1451.

### 1-(3-(cyclobutylmethyl)phenyl)-1H-pyrazole (**17**)

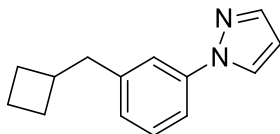

General procedure 1 was followed using 1-(3-bromophenyl)-1H-pyrazole (**Core 1**, 55.8 mg, 0.25 mmol) as the aryl halide, 1-(2-bromoethyl)pyrrolidin-2-one (**A17**, 74.5 mg, 0.50 mmol) as the alkyl reagent, and **Ligand 10** (4.72 mg, 0.02 mmol). After the reaction was complete, the reaction was concentrated under a stream of dinitrogen. The crude residue was dissolved in DMA and filtered through Celite. The product was purified by reverse phase HPLC using trifluoroacetic acid conditions and a focused gradient to afford the title compound (**17**) (5.8 mg, 11 % yield, 97% pure by  $^1\text{H}$  NMR).  $^1\text{H}$  NMR (600 MHz, DMSO)  $\delta$  8.47 (dd,  $J$  = 2.5, 0.6 Hz, 1H), 7.72 (dd,  $J$  = 1.7, 0.6 Hz, 1H), 7.66 – 7.60 (m, 2H), 7.37 (td,  $J$  = 7.7, 0.7 Hz, 1H), 7.14 – 7.07 (m, 1H), 6.52 (dd,  $J$  = 2.5, 1.7 Hz, 1H), 2.74 (d,  $J$  = 7.6 Hz, 2H), 2.59 (hept,  $J$  = 7.8 Hz, 1H), 2.03 – 1.93 (m, 2H), 1.86 – 1.78 (m, 2H), 1.76 – 1.67 (m, 2H).  $^{13}\text{C}$  NMR (101 MHz, DMSO)  $\delta$  142.8, 141.2, 140.2, 129.7, 128.1, 126.7, 118.8, 116.3, 108.4, 108.4, 108.1, 42.5, 37.1, 36.9, 36.8, 36.7, 27.9, 18.4, 18.3, 18.1. HRMS (ESI+):  $m/z$  calcd for  $\text{C}_{14}\text{H}_{17}\text{N}_2^+$ : 213.17 [M+H] $^+$ ; found: 213.139.

### 1-(3-(2-(1,3-dioxan-2-yl)ethyl)phenyl)-1H-pyrazole (**19**)

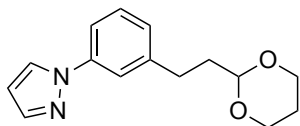

General procedure 2 was followed using 1-(3-bromophenyl)-1H-pyrazole (**Core 1**, 111.5 mg, 0.50 mmol) as the aryl halide, 2-(2-bromoethyl)-1,3-dioxane (**A19**, 97.53 mg, 0.50 mmol) as the alkyl reagent, 25 mol % NaI (18.7 mg, 0.125 mmol), and **Ligand 13** (8.2 mg, 0.030 mmol, 6 mol %). After the reaction was complete, the reaction mixture was diluted with aqueous NaOH (2M, 20 mL) and extracted into DCM. The combined organic layers were dried over  $\text{Na}_2\text{SO}_4$  concentrated in vacuo to produce an orange oil. The



crude residue was purified by flash column chromatography on silica (10-20% EtOAc in cyclohexane) affording product **19** as a clear colorless oil in 59% yield (76.7 mg, 0.297 mmol) that was inseparable from the homodimer of the alkyl halide, 1,4-di(1,3-dioxan-2-yl)butane (9.0 mg, 0.037 mmol). <sup>1</sup>H NMR (500 MHz, CDCl<sub>3</sub>) δ 7.91 (d, *J* = 2.4 Hz, 1H), 7.71 (d, *J* = 1.8 Hz, 1H), 7.56 (t, *J* = 2.0 Hz, 1H), 7.51 (dd, *J* = 7.7, 1.6 Hz, 1H), 7.35 (t, *J* = 7.8 Hz, 1H), 7.13 (dt, *J* = 7.6, 1.3 Hz, 1H), 6.46 (t, *J* = 2.2 Hz, 1H), 4.53 (t, *J* = 5.2 Hz, 1H), 4.12 (dd, *J* = 10.5, 5.0 Hz, 1H), 3.75 (td, *J* = 12.4, 2.3 Hz, 2H), 2.83 – 2.75 (m, 2H), 2.16 – 2.04 (m, 1H), 1.99 – 1.91 (m, 2H), 1.63 – 1.60 (m, 1H); <sup>13</sup>C NMR (126 MHz, CDCl<sub>3</sub>) δ 143.4, 140.9, 140.3, 129.4, 126.8, 126.6, 119.4, 116.8, 107.5, 102.3, 101.3, 66.9, 36.5, 35.2, 30.1, 25.9, 25.8, 23.9; HRMS (ESI): *m/z* calcd for C<sub>15</sub>H<sub>19</sub>N<sub>2</sub>O<sub>2</sub><sup>+</sup>: 259.1441 [*M*+H]<sup>+</sup>; found: 259.1437.

### 1-(3-((tetrahydrofuran-2-yl)methyl)phenyl)-1H-pyrazole (**23**)

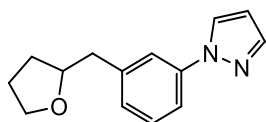

General procedure 1 was followed using 1-(3-bromophenyl)-1H-pyrazole (**Core 1**, 22.3mg, 0.10 mmol) as the aryl halide, 4-(2-bromoethyl)tetrahydro-2H-pyran (**A23**, 38.62 mg, 0.20 mmol) as the alkyl reagent, and **Ligand 13** (1.88 mg, 0.01 mmol). After the reaction was complete, the reaction was concentrated under N<sub>2</sub> stream. The crude residue was dissolved in DMA and filtered through celite. The product was purified by reverse phase HPLC using ammonium acetate conditions and a focused gradient to afford the title compound (**23**) (6.9 mg, 27% yield). <sup>1</sup>H NMR (400 MHz, DMSO) δ 8.32 (d, *J* = 2.4 Hz, 1H), 7.68 (t, *J* = 2.1 Hz, 2H), 7.61 (ddd, *J* = 8.1, 2.3, 1.0 Hz, 1H), 7.36 (t, *J* = 7.8 Hz, 1H), 7.16 (dt, *J* = 7.6, 1.4 Hz, 1H), 6.48 (dd, *J* = 2.5, 1.8 Hz, 1H), 4.10 – 3.99 (m, 1H), 3.79 (ddd, *J* = 8.2, 7.2, 6.1 Hz, 1H), 3.62 (td, *J* = 7.9, 6.3 Hz, 1H), 2.83 (qd, *J* = 13.7, 6.3 Hz, 2H), 1.97 – 1.72 (m, 3H), 1.53 (ddt, *J* = 11.4, 8.3, 7.1 Hz, 1H). <sup>13</sup>C NMR (101 MHz, DMSO) δ 141.2, 140.0, 129.6, 128.1, 127.5, 119.6, 116.5, 108.1, 79.5, 67.5, 67.4, 41.5, 31.0, 25.5. HRMS (ESI<sup>+</sup>): *m/z* calcd for C<sub>14</sub>H<sub>17</sub>N<sub>2</sub>O<sup>+</sup>: 229.1341 [*M*+H]<sup>+</sup>; found: 229.1347.

### 1-(3-cyclobutylphenyl)-1H-pyrazole (**24**)

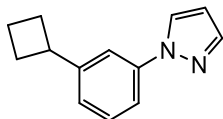

General procedure 1 was followed using 1-(3-bromophenyl)-1H-pyrazole (**Core 1**, 55.8 mg, 0.25 mmol) as the aryl halide, cyclobutyl bromide (**A24**, 67.5 mg, 0.50 mmol) as the alkyl reagent, and **Ligand 13** (4.10 mg, 0.02 mmol). After the reaction was complete, the reaction was concentrated under a stream of dinitrogen. The crude residue was dissolved in DMA and filtered through Celite. The product was purified by reverse phase HPLC using ammonium acetate conditions and a focused gradient to afford the title compound (**24**) (14 mg, 28% yield). <sup>1</sup>H NMR (400 MHz, DMSO) δ 8.35 (dd, *J* = 2.6, 0.6 Hz, 1H), 7.68 – 7.63 (m, 2H), 7.58 (ddd, *J* = 8.0, 2.4, 1.0 Hz, 1H), 7.38 (t, *J* = 7.8 Hz, 1H), 7.15 (ddt, *J* = 7.6, 1.8, 0.9 Hz, 1H), 6.48 (dd, *J* = 2.5, 1.8 Hz, 1H), 3.60 (p, *J* = 8.6 Hz, 1H), 2.41 – 2.32 (m, 2H), 2.21 – 2.09 (m, 2H), 2.07 – 1.95 (m,

1H), 1.92 – 1.82 (m, 1H). <sup>13</sup>C NMR (101 MHz, DMSO) δ 147.7, 141.2, 140.1, 129.8, 128.2, 124.5, 116.7, 116.3, 108.1, 37.5, 29.7, 18.2. HRMS (ESI+): *m/z* calcd C<sub>13</sub>H<sub>15</sub>N<sub>2</sub><sup>+</sup>: 199.1230 [M+H]<sup>+</sup>;found: 199.1231.

### 1-(3-(3-(benzyloxy)cyclobutyl)phenyl)-1H-pyrazole (35)

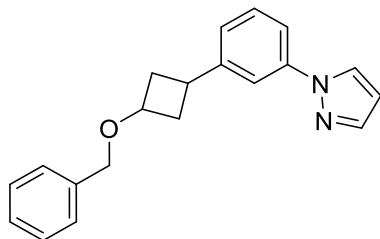

General procedure 1 was followed using 1-(3-bromophenyl)-1H-pyrazole (**Core 1**, 55.8 mg, 0.25 mmol) as the aryl halide, ((3-bromocyclobutoxy)methyl)benzene (**A35**, 121 mg, 0.50 mmol) as the alkyl reagent, and **Ligand 13** (4.11 mg, 0.50 mmol). After the reaction was complete, the reaction was concentrated under a stream of dinitrogen. The crude residue was dissolved in DMA and filtered through Celite. The product was purified by reverse phase HPLC using ammonium acetate conditions and a focused gradient to afford the title compound (**35**) (20 mg, 27% yield, apparent ~2:1 mixture of cis and trans isomers). <sup>1</sup>H NMR (600 MHz, DMSO) δ 8.51 (ddd, *J* = 3.1, 2.5, 0.6 Hz, 1H), 7.74 – 7.72 (m, 1H), 7.71 – 7.69 (m, 1H), 7.65 (ddt, *J* = 8.1, 2.3, 1.3 Hz, 1H), 7.42 (q, *J* = 7.6 Hz, 1H), 7.39 – 7.33 (m, 4H), 7.31 – 7.27 (m, 1H), 7.23 – 7.16 (m, 1H), 6.53 (ddd, *J* = 3.3, 2.5, 1.7 Hz, 1H), 4.43 (d, *J* = 2.9 Hz, 2H), 4.04 (tt, *J* = 7.9, 6.5 Hz, 1H), 3.08 (tt, *J* = 10.3, 7.6 Hz, 1H), 2.71 – 2.65 (m, 1H), 2.49 – 2.44 (m, 1H), 2.43 – 2.38 (m, 1H), 2.04 – 1.97 (m, 1H). <sup>13</sup>C NMR (101 MHz, DMSO) δ 147.5, 146.7, 141.3, 140.3, 140.2, 138.93, 138.86, 129.93, 129.86, 128.6, 128.20, 128.19, 128.12, 128.08, 127.83, 127.80, 124.8, 117.04, 117.00, 116.5, 116.4, 108.1, 71.7, 69.61, 69.54, 68.8, 38.1, 36.3, 33.7, 30.5. HRMS (ESI+): *m/z* calcd C<sub>20</sub>H<sub>21</sub>N<sub>2</sub>O<sup>+</sup>: 305.1648 [M+H]<sup>+</sup>;found: 305.1655.

### 3-(3-(1H-pyrazol-1-yl)phenyl)-N,N-dimethylpropanamide (37)

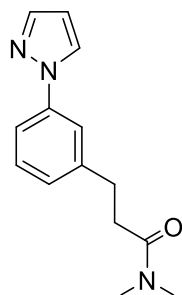

General procedure 1 was followed using 1-(3-bromophenyl)-1H-pyrazole (**Core 1**, 55.8 mg, 0.25 mmol) as the aryl halide, 3-bromo-*N,N*-dimethylpropanamide (**A37**, 67.5 mg, 0.5 mmol) as the alkyl reagent, and **Ligand 13** (4.10 mg, 0.02 mmol). After the reaction was complete, the reaction was concentrated under a stream of dinitrogen. The crude residue was dissolved in DMA and filtered through Celite. The product was purified by reverse phase HPLC using ammonium acetate conditions and a focused gradient to afford the title compound (**37**) (14 mg, 22% yield) <sup>1</sup>H NMR (400 MHz, DMSO) δ 8.33 (d, *J* = 2.4 Hz, 1H), 7.70 –

7.65 (m, 2H), 7.59 (ddd,  $J = 8.1, 2.3, 1.0$  Hz, 1H), 7.36 (t,  $J = 7.8$  Hz, 1H), 7.16 (dt,  $J = 7.7, 1.3$  Hz, 1H), 6.48 (dd,  $J = 2.5, 1.7$  Hz, 1H), 2.91 (t,  $J = 7.6$  Hz, 6H), 2.65 (dd,  $J = 8.3, 6.9$  Hz, 2H).  $^{13}\text{C}$  NMR (101 MHz, DMSO)  $\delta$  171.6, 143.7, 141.3, 140.2, 129.8, 128.1, 126.7, 118.9, 116.5, 108.2, 37.1, 35.3, 34.4, 31.1. HRMS (ESI+):  $m/z$  calcd  $\text{C}_{14}\text{H}_{18}\text{N}_3\text{O}^+$ : 244.1444 [M+H] $^+$ ;found: 244.1447.

#### 1-methyl-4-(4-(oxetan-3-yl)benzyl)piperazine (40)

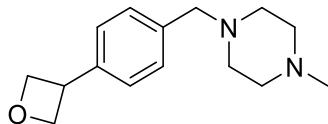

General procedure 1 was followed using 1-(4-bromobenzyl)-4-methylpiperazine (**Core 2**, 67.3 mg, 0.25 mmol) as the aryl halide, 3-bromooxetane (**A3**, 68.5 mg, 0.50 mmol) as the alkyl reagent and **Ligand 13** (4.10 mg, 0.02 mmol). After the reaction was complete, the reaction was concentrated under a stream of dinitrogen. The crude residue was dissolved in DMA and filtered through Celite. The product was purified by reverse phase HPLC using ammonium acetate conditions and a focused gradient to afford the title compound (**40**) (23 mg, 37% yield, 90% pure by  $^1\text{H}$  NMR).  $^1\text{H}$  NMR (400 MHz, DMSO)  $\delta$  7.34 (d,  $J = 8.1$  Hz, 2H), 7.27 (d,  $J = 8.2$  Hz, 1H), 4.96 – 4.88 (m, 2H), 4.63 – 4.57 (m, 2H), 4.27 – 4.17 (m, 1H), 3.42 (s, 2H), 2.33 (m, 8H), 2.13 (s, 3H).  $^{13}\text{C}$  NMR (101 MHz, DMSO)  $\delta$  140.7, 137.3, 129.5, 127.0, 78.0, 62.2, 55.2, 53.0, 46.2, 39.4. HRMS (ESI+):  $m/z$  calcd  $\text{C}_{15}\text{H}_{23}\text{N}_2\text{O}^+$ : 247.1805 [M+H] $^+$ ;found: 247.1808.

#### 1-(4-(cyclobutylmethyl)benzyl)-4-methylpiperazine (54)

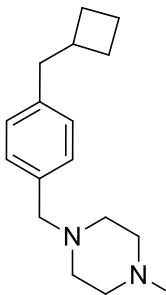

General procedure 1 was followed using 1-(4-bromobenzyl)-4-methylpiperazine (**Core 2**, 67.3 mg, 0.25 mmol) as the aryl halide, (bromomethyl)cyclobutene (**A17**, 74.5 mg, 0.5 mmol) as alkyl reagent, and **Ligand 13** (5.27 mg, 0.50 mmol). After the reaction was complete, the reaction was concentrated under a stream of dinitrogen. The crude residue was dissolved in DMA and filtered through Celite. The product was purified by reverse phase HPLC using ammonium acetate conditions and a focused gradient to afford the title compound (**54**) (9.2 mg, 14% yield, >90% pure by  $^1\text{H}$  NMR)  $^1\text{H}$  NMR (500 MHz, PYRIDINE)  $\delta$  7.30 (d,  $J = 8.0$  Hz, 2H), 7.19 (d,  $J = 7.9$  Hz, 7H), 3.47 (s, 2H), 3.06 (s, 3H), 2.71 (s, 3H), 2.66 (s, 3H), 2.64 (s, 1H), 2.51 (p,  $J = 7.8$  Hz, 1H), 1.96 (dddd,  $J = 11.5, 8.1, 5.6, 1.6$  Hz, 2H), 1.82 – 1.72 (m, 2H), 1.72 – 1.62 (m, 2H).  $^{13}\text{C}$  NMR (101 MHz, DMSO)  $\delta$  139.8, 135.9, 129.2, 128.6, 62.3, 55.1, 52.9, 46.1, 42.3, 37.1, 28.0, 18.3. HRMS (ESI+):  $m/z$  calcd  $\text{C}_{17}\text{H}_{27}\text{N}_2^+$ : 259.2169 [M+H] $^+$ ;found: 259.2171.

### 1-(4-(2-methoxyethyl)benzyl)-4-methylpiperazine (**57**)

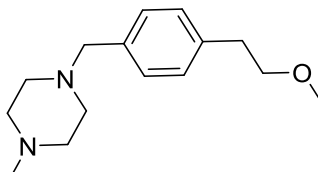

General procedure 1 was followed using 1-(4-bromobenzyl)-4-methylpiperazine (**Core 2**, 67.3mg, 0.25 mmol) as the aryl halide, 1-bromo-2-methoxyethane (**A20**, 69.5 mg, 0.50 mmol) as the alkyl reagent, and **Ligand 13** (5.27 mg, 0.02 mmol). After the reaction was complete, the reaction was concentrated under a stream of dinitrogen. The crude residue was dissolved in DMA and filtered through Celite. The product was purified by reverse phase HPLC using ammonium acetate conditions and a focused gradient to afford the title compound (**57**) (38 mg, 32% yield, >90% pure by  $^1\text{H}$  NMR).  $^1\text{H}$  NMR (500 MHz, PYRIDINE)  $\delta$  7.29 (s, 4H), 3.61 (s, 3H), 3.57 (t,  $J$  = 6.8 Hz, 2H), 3.45 (s, 2H), 3.25 (s, 2H), 3.10 (s, 2H), 2.90 (t,  $J$  = 6.8 Hz, 2H), 2.73 – 2.70 (m, 2H), 2.69 (s, 3H).  $^{13}\text{C}$  NMR (101 MHz, DMSO)  $\delta$  159.0, 139.8, 130.3, 129.4, 73.0, 60.0, 58.2, 51.8, 49.0, 42.6, 35.4. HRMS (ESI+):  $m/z$  calcd  $\text{C}_{15}\text{H}_{25}\text{N}_2\text{O}^+$ : 249.1961 [M+H] $^+$ ;found: 249.1965.

### 1-methyl-4-(4-(oxetan-3-ylmethyl)benzyl)piperazine (**58**)

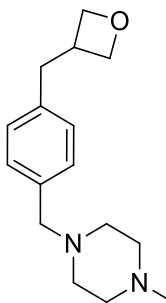

General procedure 1 was followed using 1-(4-bromobenzyl)-4-methylpiperazine (**Core 2**, 67.3 mg, 0.25 mmol) as the aryl halide, 3-(bromomethyl)oxetane (**A21**, 75.5 mg, 0.5 mmol) as the alkyl reagent, and **Ligand 13** (5.27 mg, 0.02 mmol). After the reaction was complete, the reaction was concentrated under a stream of dinitrogen. The crude residue was dissolved in DMA and filtered through Celite. The product was purified by reverse phase HPLC using ammonium acetate conditions and a focused gradient to afford the title compound (**58**) (7.5 mg, 12% yield, 96% pure by  $^1\text{H}$  NMR).  $^1\text{H}$  NMR (400 MHz, DMSO)  $\delta$  7.18 (d,  $J$  = 8.0 Hz, 2H), 7.10 (d,  $J$  = 8.0 Hz, 2H), 4.62 (dd,  $J$  = 7.7, 5.8 Hz, 2H), 4.32 (t,  $J$  = 6.1 Hz, 2H), 3.38 (s, 3H), 3.29 (s, 3H), 3.28 – 3.17 (m, 1H), 2.92 (d,  $J$  = 7.8 Hz, 2H), 2.40 – 2.21 (m, 7H), 2.13 (s, 3H).  $^{13}\text{C}$  NMR (101 MHz, DMSO)  $\delta$  138.5, 136.5, 129.4, 128.5, 76.3, 62.3, 55.2, 52.9, 46.2, 38.9, 35.9. HRMS (ESI+):  $m/z$  calcd  $\text{C}_{16}\text{H}_{25}\text{N}_2\text{O}^+$ : 261.1961 [M+H] $^+$ ;found: 261.1964.

### 1-(4-((3,3-difluorocyclobutyl)methyl)benzyl)-4-methylpiperazine (59)

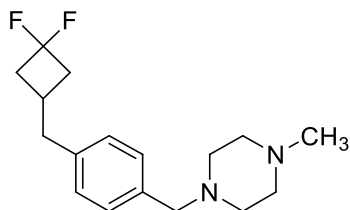

General procedure 1 was followed using 1-(4-bromobenzyl)-4-methylpiperazine (**Core 2**, 67.3 mg, 0.25 mmol) as the aryl halide, 3-(bromomethyl)-1,1-difluorocyclobutane (**A22**, 92.5mg, 0.50 mmol) as the alkyl reagent, and **Ligand 13** (5.27 mg, 0.02mmol). After the reaction was complete, the reaction was concentrated under a stream of dinitrogen. The crude residue was dissolved in DMA and filtered through Celite. The product was purified by reverse phase HPLC using trifluoroacetic acid conditions and a focused gradient to afford the title compound (**59**) as the *bis*-trifluoroacetic acid salt (27 mg, 21% yield)  $^1\text{H}$  NMR (500 MHz, pyridine- $d_5$ )  $\delta$  7.33 (d,  $J$  = 8.1 Hz, 2H), 7.19 (d,  $J$  = 7.8 Hz, 2H), 3.61 (s, 5H), 3.48 (s, 2H), 3.06 (s, 2H), 2.70 (d,  $J$  = 7.6 Hz, 5H), 2.66 (s, 3H), 2.58 (ddt,  $J$  = 14.2, 11.6, 7.7 Hz, 2H), 2.37 – 2.31 (m, 1H), 2.30 – 2.21 (m, 2H).  $^{13}\text{C}$  NMR (101 MHz, DMSO)  $\delta$  140.3, 130.4, 129.1, 60.2, 52.0, 49.1, 42.7, 40.7, 40.2 (t,  $J$  = 20.6 Hz, 2C), 24.3 (t,  $J$  = 6.2 Hz). Note: due to the small amount of material and the presence of trifluoroacetate, we were unable to fully resolve the difluoromethane  $\text{CF}_2$  carbon in the  $^{13}\text{C}$  NMR spectrum, although a small peak near the expected 121 ppm was observed. HRMS (ESI+):  $m/z$  calcd  $\text{C}_{17}\text{H}_{25}\text{F}_2\text{N}_2^+$ : 295.1980  $[\text{M}+\text{H}]^+$ ;found: 295.1981.

### 1-methyl-4-(4-((tetrahydrofuran-2-yl)methyl)benzyl)piperazine (60)

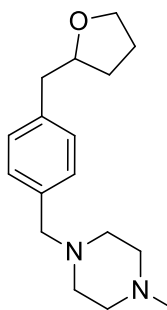

General procedure 1 was followed using 1-(4-bromobenzyl)-4-methylpiperazine (**Core 2**, 67.3 mg, 0.25 mmol) as the aryl halide, 2-(bromomethyl)tetrahydrofuran (**A23**, 82.5 mg, 0.50 mmol) as alkyl reagent, and **Ligand 13** (5.27mg, 0.02 mmol). After the reaction was complete, the reaction was concentrated under a stream of dinitrogen. The crude residue was dissolved in DMA and filtered through Celite. The product was purified by reverse phase HPLC using ammonium acetate conditions and a focused gradient to afford the title compound (**60**) (11 mg, 15% yield, 92% pure by  $^1\text{H}$  NMR).  $^1\text{H}$  NMR (500 MHz, DMSO)  $\delta$  7.22 – 7.13 (m, 4H), 3.94 (p,  $J$  = 6.6 Hz, 1H), 3.76 (ddd,  $J$  = 8.3, 7.2, 6.0 Hz, 1H), 3.58 (td,  $J$  = 7.8, 6.2 Hz, 2H), 3.39 (s, 2H), 2.79 – 2.63 (m, 2H), 2.40 – 2.22 (m, 6H), 2.13 (s, 3H), 1.90 (s, 2H), 1.87 – 1.73 (m, 3H), 1.52 – 1.42 (m, 1H).  $^{13}\text{C}$  NMR (101 MHz, DMSO)  $\delta$  138.0, 136.3, 129.4, 129.0, 79.7, 67.3, 62.3, 55.2, 53.0, 46.2, 41.3, 31.0, 25.5. HRMS (ESI+):  $m/z$  calcd  $\text{C}_{17}\text{H}_{27}\text{N}_2\text{O}^+$ : 275.2118  $[\text{M}+\text{H}]^+$ ;found: 275.2122.

### 6-(2-methoxyethyl)quinazoline (94)

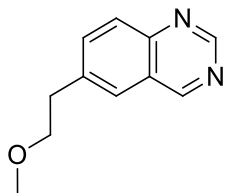

General procedure 1 was followed using 6-bromoquinazoline (**Core 3**, 52.3 mg, 0.25 mmol) as the aryl halide, 1-bromo-2-methoxyethane (**A20**, 69.5 mg, 0.5 mmol) as the alkyl reagent, and **Ligand 13** (4.10 mg, 0.02 mmol). After the reaction was complete, the reaction was concentrated under a stream of dinitrogen. The crude residue was dissolved in DMA and filtered through Celite. The product was purified by reverse phase HPLC using ammonium acetate conditions and a focused gradient to afford the title compound (**94**) (15mg, 32% yield, >95% pure by  $^1\text{H}$  NMR (400 MHz, DMSO)  $\delta$  9.49 (s, 1H), 9.21 (s, 1H), 7.94 (dq,  $J = 1.7$ , 0.9 Hz, 1H), 7.93 – 7.90 (m, 2H), 3.69 (t,  $J = 6.5$  Hz, 2H), 3.28 (s, 3H), 3.06 (td,  $J = 6.6$ , 0.8 Hz, 2H).  $^{13}\text{C}$  NMR (101 MHz, DMSO)  $\delta$  160.5, 155.0, 148.7, 140.1, 136.7, 127.9, 127.0, 125.1, 72.6, 58.4, 35.7. HRMS (ESI+):  $m/z$  calcd  $\text{C}_{11}\text{H}_{13}\text{N}_2\text{O}^+$ : 189.1022 [M+H] $^+$ ; found: 189.1024.

### 6-(oxetan-3-ylmethyl)quinazoline (95)

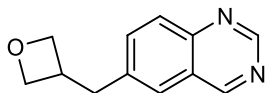

General procedure 1 was followed using 6-bromoquinazoline (**Core 3**, 20.90 mg, 0.10 mmol) as the aryl halide, 3-(bromomethyl)oxetane (**A21**, 30.20 mg, 0.20 mmol) as the alkyl reagent, and **Ligand 13** (1.64 mg, 0.01 mmol). After the reaction was complete, the reaction was concentrated under a stream of dinitrogen. The crude residue was dissolved in DMA and filtered through Celite. The product was purified by reverse phase HPLC using ammonium acetate conditions and a focused gradient to afford the title compound (**95**) (2 mg, 9% yield, >90% pure by  $^1\text{H}$  NMR).  $^1\text{H}$  NMR (400 MHz, DMSO)  $\delta$  9.49 (s, 1H), 9.22 (s, 1H), 7.92 (d,  $J = 8.6$  Hz, 1H), 7.87 (dd,  $J = 2.0$ , 0.9 Hz, 1H), 7.85 (dd,  $J = 8.6$ , 2.0 Hz, 1H), 4.69 (dd,  $J = 7.6$ , 5.8 Hz, 2H), 4.40 (t,  $J = 6.0$  Hz, 2H), 3.48 – 3.34 (m, 1H), 3.21 (d,  $J = 7.7$  Hz, 2H).  $^{13}\text{C}$  NMR (101 MHz, DMSO)  $\delta$  160.5, 155.0, 148.6, 140.2, 136.3, 128.2, 126.2, 125.1, 76.1, 38.9, 35.5. HRMS (ESI+):  $m/z$  calcd  $\text{C}_{12}\text{H}_{13}\text{N}_2\text{O}^+$ : 201.1022 [M+H] $^+$ ; found: 201.1026.

### 6-cyclobutylquinazoline (98)

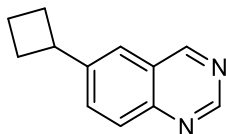

General procedure 1 was followed using 6-bromoquinazoline (**Core 3**, 20.90 mg, 0.10 mmol) as the aryl halide, bromocyclobutane (**A24**, 27.00 mg, 0.20 mmol) as the alkyl reagent, and **Ligand 13** (1.64 mg, 0.01 mmol). After the reaction was complete, the reaction was concentrated under a stream of dinitrogen. The

crude residue was dissolved in DMA and filtered through Celite. The product was purified by reverse phase HPLC using ammonium acetate conditions and a focused gradient to afford the title compound (**98**) (5.1 mg, 28% yield, >90% pure by <sup>1</sup>H NMR). <sup>1</sup>H NMR (400 MHz, DMSO-*d*<sub>6</sub>) δ 9.56 (s, 1H), 9.24 (s, 1H), 7.99 – 7.92 (m, 3H), 3.78 (p, *J* = 9.0 Hz, 1H), 2.41 (qt, *J* = 8.1, 2.6 Hz, 2H), 2.27 – 2.16 (m, 2H), 2.12 – 2.01 (m, 1H), 1.93 – 1.84 (m, 1H). <sup>13</sup>C NMR (101 MHz, DMSO) δ 160.6, 154.9, 148.5, 146.1, 134.6, 128.0, 125.1, 124.0, 29.5, 18.2. Note: we estimate that the tertiary benzylic cyclobutane carbon would appear underneath the DMSO residual solvent peak and could not locate it.<sup>3</sup> HRMS (ESI+): *m/z* calcd C<sub>12</sub>H<sub>13</sub>N<sub>12</sub><sup>+</sup>: 185.1073 [M+H]<sup>+</sup>; found: 185.1076.

### 6-(tetrahydrofuran-3-yl)pyrazolo[1,5-a]pyrimidine (**112**)

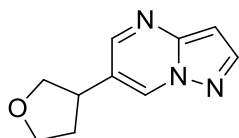

General procedure 1 was followed using 6-bromopyrazolo[1,5-a]pyrimidine (**Core 4**, 49.51 mg, 0.25 mmol) as the aryl halide, 3-bromotetrahydrofuran (**A1**, 75.5 mg, 0.50 mmol) as the alkyl reagent, and **Ligand 13** (4.10 mg, 0.02 mmol). After the reaction was complete, the reaction was concentrated under a stream of dinitrogen. The crude residue was dissolved in DMA and filtered through Celite. The product was purified by reverse phase HPLC using ammonium acetate conditions and a focused gradient to afford the title compound (**112**) (5.4 mg, 11% yield, 90% pure by <sup>1</sup>H NMR). <sup>1</sup>H NMR (400 MHz, DMSO) δ 9.00 (dd, *J* = 2.1, 1.0 Hz, 1H), 8.56 (d, *J* = 2.2 Hz, 1H), 8.17 (d, *J* = 2.3 Hz, 1H), 6.69 (dd, *J* = 2.3, 0.9 Hz, 1H), 4.05 (dd, *J* = 8.4, 7.2 Hz, 1H), 3.99 (td, *J* = 8.4, 4.7 Hz, 1H), 3.82 (dt, *J* = 8.4, 7.5 Hz, 1H), 3.67 (dd, *J* = 8.4, 7.1 Hz, 1H), 3.50 (p, *J* = 7.5 Hz, 1H), 2.42 – 2.32 (m, 1H), 2.06 (dq, *J* = 12.4, 7.7 Hz, 1H). <sup>13</sup>C NMR (101 MHz, DMSO) δ 151.0, 147.4, 144.9, 133.1, 123.4, 96.2, 73.4, 67.9, 39.5, 33.2. HRMS (ESI+): *m/z* calcd C<sub>10</sub>H<sub>12</sub>N<sub>3</sub>O<sup>+</sup>: 190.0975 [M+H]<sup>+</sup>; found: 190.0978.

### 6-(2-(tetrahydro-2H-pyran-4-yl)ethyl)pyrazolo[1,5-a]pyrimidine (**113**)

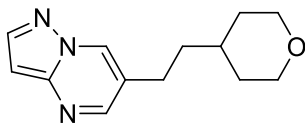

General procedure 1 was followed using 6-bromopyrazolo[1,5-a]pyrimidine (**Core 4**, 19.8 mg, 0.10 mmol) as the aryl halide, 2-(2-bromoethyl)-1,3-dioxane (**A2**, 39.0mg, 0.20 mmol) as the alkyl reagent, and **Ligand 13** (1.64 mg, 0.01 mmol). After the reaction was complete, the reaction was concentrated under a stream of dinitrogen. The crude residue was dissolved in DMA and filtered through Celite. The product was purified by reverse phase HPLC using ammonium acetate conditions and a focused gradient to afford the title compound (**113**) (7.8 mg, 34% yield, >90% pure by <sup>1</sup>H NMR). <sup>1</sup>H NMR (400 MHz, DMSO) δ 8.84 (dd, *J* = 2.1, 1.0 Hz, 1H), 8.45 (d, *J* = 2.2 Hz, 1H), 8.07 (d, *J* = 2.4 Hz, 1H), 6.60 (dd, *J* = 2.3, 1.0 Hz, 1H), 3.83 (ddd, *J* = 11.3, 4.3, 2.1 Hz, 2H), 3.30 (dd, *J* = 11.6, 2.2 Hz, 2H), 2.71 – 2.66 (m, 2H), 1.68 – 1.58 (m, 4H), 1.53 (ddt,

$J = 13.3, 6.7, 3.4$  Hz, 1H), 1.29 – 1.17 (m, 2H).  $^{13}\text{C}$  NMR (101 MHz, DMSO)  $\delta$  152.0, 147.4, 144.6, 133.6, 122.8, 96.1, 67.5, 37.8, 34.2, 33.0, 26.2. HRMS (ESI+):  $m/z$  calcd  $\text{C}_{13}\text{H}_{18}\text{N}_3\text{O}^+$ : 232.1444 [M+H] $^+$ ; found: 232.1447.

### (S)-tert-butyl-4,4-difluoro-2-(pyrazolo[1,5-a]pyrimidin-6-ylmethyl)pyrrolidine-1-carboxylate (**118**)

(Abs)

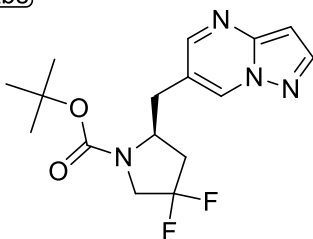

General procedure 1 was followed using 6-bromopyrazolo[1,5-a]pyrimidine (**Core 4**, 19.8 mg, 0.10 mmol) as the aryl halide, (*R*)-tert-butyl 2-(bromomethyl)-4,4-difluoropyrrolidine-1-carboxylate (**A7**, 60.0 mg, 0.20 mmol) as the alkyl reagent, and **Ligand 13** (1.64 mg, 0.01 mmol). After the reaction was complete, the reaction was concentrated under a stream of dinitrogen. The crude residue was dissolved in DMA and filtered through Celite. The product was purified by reverse phase HPLC using ammonium acetate conditions and a focused gradient to afford the title compound (**118**) (8.6 mg, 25% yield, >90% pure by  $^1\text{H}$  NMR).  $^1\text{H}$  NMR (400 MHz, DMSO)  $\delta$  8.80 (dt,  $J = 2.1, 1.0$  Hz, 1H), 8.42 (d,  $J = 2.2$  Hz, 1H), 8.07 (d,  $J = 2.4$  Hz, 1H), 6.60 (dd,  $J = 2.3, 0.9$  Hz, 1H), 4.59 (t,  $J = 4.9$  Hz, 1H), 4.00 (ddt,  $J = 10.3, 5.1, 1.5$  Hz, 2H), 3.75 – 3.67 (m, 2H), 2.74 (ddd,  $J = 8.9, 6.5, 1.0$  Hz, 2H), 1.96 – 1.83 (m, 3H), 1.34 (dtt,  $J = 13.3, 2.8, 1.5$  Hz, 1H).  $^{13}\text{C}$  NMR (101 MHz, DMSO)  $\delta$  153.5, 152.2, 147.4, 144.9, 134.8, 128.8 (t,  $J_{\text{CF}} = 230.7$  Hz), 119.0, 96.2, 80.0, 57.1, 52.6, 34.4, 33.7, 28.0. Note: many of the carbon peaks were broadened, presumably due to E/Z isomers in the *N*-Boc group, which prevented us from identifying  $J_{\text{CF}}$  for any carbons except for the  $\text{CF}_2$ . HRMS (ESI+):  $m/z$  calcd  $\text{C}_{16}\text{H}_{21}\text{F}_2\text{N}_4\text{O}_2^+$ : 339.1627 [M+H] $^+$ ; found: 339.1632.

### 6-(cyclobutylmethyl)pyrazolo[1,5-a]pyrimidine (**128**)

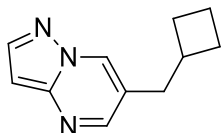

General procedure 1 was followed using 6-bromopyrazolo[1,5-a]pyrimidine (**Core 4**, 49.51mg, 0.25 mmol) as the aryl halide, (bromomethyl)cyclobutene (**A17**, 74.5mg, 0.50 mmol) as the alkyl reagent, and **Ligand 13** (1.64 mg, 0.01 mmol). After the reaction was complete, the reaction was concentrated under a stream of dinitrogen. The crude residue was dissolved in DMA and filtered through Celite. The product was purified by reverse phase HPLC using ammonium acetate conditions and a focused gradient to afford the title compound (**128**) (4 mg, 8% yield, 90% pure by  $^1\text{H}$  NMR).  $^1\text{H}$  NMR (400 MHz, DMSO)  $\delta$  8.93 (dq,  $J = 1.9, 0.9$  Hz, 1H), 8.46 (d,  $J = 2.1$  Hz, 1H), 8.14 (d,  $J = 2.3$  Hz, 1H), 6.66 (dd,  $J = 2.3, 0.9$  Hz, 1H), 2.74 (d,  $J = 7.6$  Hz, 2H), 2.60 (dt,  $J = 15.4, 7.8$  Hz, 1H), 1.99 (tdd,  $J = 8.2, 6.8, 3.0$  Hz, 2H), 1.88 – 1.78 (m, 2H), 1.78 – 1.68 (m,



2H).  $^{13}\text{C}$  NMR (101 MHz, DMSO)  $\delta$  152.0, 147.3, 144.6, 133.6, 121.2, 96.1, 36.2, 35.9, 27.5, 18.0. HRMS (ESI+):  $m/z$  calcd  $\text{C}_{11}\text{H}_{14}\text{N}_3^+$ : 188.1182  $[\text{M}+\text{H}]^+$ ; found: 188.1185.

### 6-(2-(1,3-dioxan-2-yl)ethyl)pyrazolo[1,5-a]pyrimidine (130)

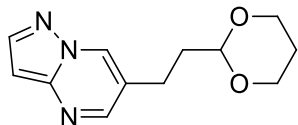

General procedure 1 was followed using 6-bromopyrazolo[1,5-a]pyrimidine (**Core 4**, 19.8 mg, 0.10 mmol) as the aryl halide, 2-(2-bromoethyl)-1,3-dioxane (**A19**, 39.0mg, 0.20 mmol) as the alkyl reagent, and **Ligand 13** (1.64 mg, 0.01 mmol). After the reaction was complete, the reaction was concentrated under a stream of dinitrogen. The crude residue was dissolved in DMA and filtered through Celite. The product was purified by reverse phase HPLC using ammonium acetate conditions and a focused gradient to afford the title compound (**130**) (4.8 mg, 21% yield, >90% pure by  $^1\text{H}$  NMR).  $^1\text{H}$  NMR (400 MHz, DMSO)  $\delta$  8.80 (dt,  $J = 2.1, 1.0$  Hz, 1H), 8.42 (d,  $J = 2.2$  Hz, 1H), 8.07 (d,  $J = 2.4$  Hz, 1H), 6.60 (dd,  $J = 2.3, 0.9$  Hz, 1H), 4.59 (t,  $J = 4.9$  Hz, 1H), 4.00 (ddt,  $J = 10.3, 5.1, 1.5$  Hz, 2H), 3.75 – 3.67 (m, 2H), 2.74 (ddd,  $J = 8.9, 6.5, 1.0$  Hz, 2H), 1.96 – 1.83 (m, 3H), 1.34 (dtt,  $J = 13.3, 2.8, 1.5$  Hz, 1H).  $^{13}\text{C}$  NMR (101 MHz, DMSO)  $\delta$  152.1, 147.4, 144.6, 133.7, 122.2, 100.9, 96.1, 66.5, 35.8, 25.9, 24.0. HRMS (ESI+):  $m/z$  calcd  $\text{C}_{12}\text{H}_{16}\text{N}_3\text{O}_2^+$ : 234.1237  $[\text{M}+\text{H}]^+$ ; found: 234.1239.

### 6-(2-(1,3-dioxan-2-yl)ethyl)pyrazolo[1,5-a]pyrimidine (130)

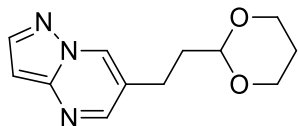

General procedure 2 was followed using 6-bromopyrazolo[1,5-a]pyrimidine (**Core 4**, 99.01 mg, 0.50 mmol) as the aryl halide, 2-(2-bromoethyl)-1,3-dioxane (**A19**, 97.53 mg, 0.50 mmol) as the alkyl reagent, and **Ligand 13** (8.2 mg, 0.030 mmol, 6 mol %). After the reaction was complete, the reaction mixture was diluted with aqueous NaOH (2M, 20 mL) and extracted into DCM. The combined organic layers were dried over  $\text{Na}_2\text{SO}_4$  concentrated in vacuo to produce an orange oil. The crude residue was purified by flash column chromatography on silica (20% EtOH, 20%  $\text{Et}_3\text{N}$  in cyclohexane) affording product **130** as yellow crystals in 19% yield (23 mg, 0.097 mmol) that was inseparable from the homodimer of the alkyl halide, 1,4-di(1,3-dioxan-2-yl)butane (11.2 mg, 0.049 mmol).  $^1\text{H}$  NMR (500 MHz,  $\text{CDCl}_3$ )  $\delta$  8.49 (dd,  $J = 2.2, 1.0$  Hz, 1H), 8.39 (d,  $J = 2.2$  Hz, 1H), 8.07 (d,  $J = 2.4$  Hz, 1H), 6.66 (dd,  $J = 2.4, 1.0$  Hz, 1H), 4.58 (t,  $J = 5.0$  Hz, 1H), 3.81 – 3.70 (m, 4H), 2.84 – 2.77 (m, 4H), 2.00 – 1.94 (m, 2H), 1.42 – 1.37 (m, 2H);  $^{13}\text{C}$  NMR (126 MHz,  $\text{CDCl}_3$ )  $\delta$  151.4, 147.6, 144.5, 132.9, 121.6, 102.3, 100.6, 96.6, 66.9, 35.7, 35.2, 26.0, 25.7, 24.1, 23.9; HRMS (ESI):  $m/z$  calcd for  $\text{C}_{12}\text{H}_{16}\text{N}_3\text{O}_2^+$ : 234.1237  $[\text{M}+\text{H}]^+$ ; found: 234.1234.

### **tert-butyl 3-(pyrazolo[1,5-a]pyrimidin-6-yl)azetidine-1-carboxylate (139)**

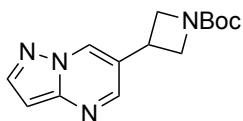

General procedure 2 was followed using 6-bromopyrazolo[1,5-a]pyrimidine (**Core 4**, 99.01 mg, 0.50 mmol) as the aryl halide, 1-Boc-3-bromoazetidine (**A28**, 118.1 mg, 0.50 mmol) as the alkyl reagent, 25 mol % NaI (18.7 mg, 0.125 mmol), and **Ligand 13** (8.2 mg, 0.030 mmol, 6 mol %). After the reaction was complete, the reaction mixture was diluted with aqueous NaOH (2M, 20 mL) and extracted into DCM. The combined organic layers were dried over Na<sub>2</sub>SO<sub>4</sub> and concentrated in vacuo to produce an orange oil. The crude residue was purified by flash column chromatography on silica (20% EtOH, 20% Et<sub>3</sub>N in cyclohexane) affording product **139** as white crystals in 15% yield (21 mg, 0.075 mmol). <sup>1</sup>H NMR (500 MHz, CDCl<sub>3</sub>) δ 8.56 (d, *J* = 2.2 Hz, 1H), 8.46 (d, *J* = 2.3 Hz, 1H), 8.05 (d, *J* = 2.4 Hz, 1H), 6.64 (dd, *J* = 2.4, 0.9 Hz, 1H), 4.36 (t, *J* = 8.8 Hz, 2H), 3.95 (dd, *J* = 8.8, 5.7 Hz, 2H), 3.72 (tt, *J* = 8.6, 5.7 Hz, 1H), 1.41 (s, 9H); <sup>13</sup>C NMR (126 MHz, CDCl<sub>3</sub>) δ 156.2, 149.2, 147.8, 145.2, 132.3, 122.3, 97.1, 80.2, 55.9, 29.0, 28.4; HRMS (ESI): *m/z* calcd for C<sub>14</sub>H<sub>19</sub>N<sub>4</sub>O<sub>2</sub><sup>+</sup>: 275.1503 [M+H]<sup>+</sup>; found: 275.1498.

### **N,N-dimethyl-3-(pyrazolo[1,5-a]pyrimidin-6-yl)propanamide (148)**

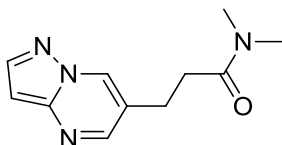

General procedure was followed using 6-bromopyrazolo[1,5-a]pyrimidine (**Core 4**, 19.8 mg, 0.10 mmol) as the aryl halide, 3-bromo-N,N-dimethylpropanamide (**A37**, 36.0 mg, 0.20 mmol) as the alkyl reagent, and **Ligand 13** (1.64 mg, 0.01 mmol). After the reaction was complete, the reaction was concentrated under a stream of dinitrogen. The crude residue was dissolved in DMA and filtered through Celite. The product was purified by reverse phase HPLC using ammonium acetate conditions and a focused gradient to afford the title compound (**148**) (6.6 mg, 30% yield, >90% pure by <sup>1</sup>H NMR). <sup>1</sup>H NMR (400 MHz, DMSO) δ 8.85 (dd, *J* = 2.2, 1.1 Hz, 1H), 8.48 (d, *J* = 2.1 Hz, 1H), 8.08 (d, *J* = 2.3 Hz, 1H), 6.60 (dd, *J* = 2.4, 0.9 Hz, 1H), 2.98 – 2.94 (m, 1H), 2.91 (dd, *J* = 8.5, 6.0 Hz, 4H), 2.89-2.81 (m, 3H), 2.72 (t, *J* = 7.2 Hz, 2H). <sup>13</sup>C NMR (101 MHz, DMSO) δ 171.3, 152.4, 147.4, 144.6, 134.0, 122.3, 96.0, 37.0, 35.3, 33.6, 24.9. HRMS (ESI+): *m/z* calcd C<sub>11</sub>H<sub>15</sub>N<sub>4</sub>O<sup>+</sup>: 219.1240 [M+H]<sup>+</sup>; found: 219.1244.

### tert-butyl 3-((4-(pyrrolidin-1-yl)pyridin-2-yl)methyl)azetidine-1-carboxylate (**153**)

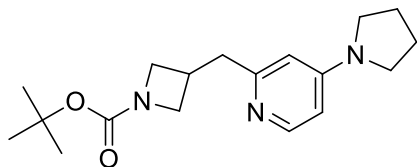

General procedure was followed using 2-bromo-4-(pyrrolidin-1-yl)pyridine (**Core 5**, 56.78 mg, 0.25 mmol) as the aryl halide, tert-butyl 3-(bromomethyl)azetidine-1-carboxylate (**A28**, 125.07 mg, 0.50 mmol) as the alkyl reagent, and **Ligand 10** (4.8 mg, 0.02 mmol). After the reaction was complete, the reaction was concentrated under a stream of dinitrogen. The crude residue was dissolved in DMA and filtered through Celite. The product was purified by reverse phase HPLC using trifluoroacetic acid conditions and a focused gradient to afford the title compound (**153**) (35 mg, 33% yield, 96% pure by  $^1\text{H}$  NMR).  $^1\text{H}$  NMR (400 MHz, DMSO)  $\delta$  13.28 (s, 1H), 8.12 (dd,  $J = 7.0, 3.6$  Hz, 1H), 6.77 – 6.71 (m, 2H), 3.95 – 3.87 (m, 2H), 3.64 (s, 2H), 3.50 – 3.45 (m, 4H), 3.02 (d,  $J = 7.8$  Hz, 2H), 2.97 – 2.87 (m, 1H), 2.03 – 1.98 (m, 4H), 1.37 (s, 9H).  $^{13}\text{C}$  NMR (101 MHz, DMSO)  $\delta$  156.0, 154.9, 151.3, 139.6, 107.1, 106.7, 79.0, 50.3, 48.6, 36.7, 28.5, 28.0, 25.1. HRMS (ESI $^+$ ):  $m/z$  calcd  $\text{C}_{18}\text{H}_{28}\text{N}_3\text{O}_2^+$ : 318.2172 [M+H] $^+$ ; found: 318.2182.

### 2-benzyl-4-(pyrrolidin-1-yl)pyridine (**181**)

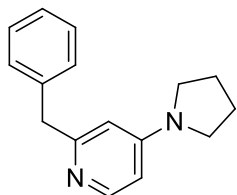

General procedure was followed using 2-bromo-4-(pyrrolidin-1-yl)pyridine (**Core 5**, 56.78 mg, 0.25 mmol) as the aryl halide, benzyl chloride (**A33**, 63.3 mg, 0.50 mmol) as the alkyl reagent, and **Ligand 10** (4.8 mg, 0.02 mmol). After the reaction was complete, the reaction was concentrated under a stream of dinitrogen. The crude residue was dissolved in DMA and filtered through Celite. The product was purified by reverse phase HPLC using trifluoroacetic acid conditions and a focused gradient to afford the title compound (**181**) (30 mg, 34% yield, 92% pure by  $^1\text{H}$  NMR).  $^1\text{H}$  NMR (400 MHz, DMSO)  $\delta$  13.39 (s, 1H), 8.12 (d,  $J = 7.1$  Hz, 1H), 7.35 (d,  $J = 4.4$  Hz, 4H), 7.31 – 7.25 (m, 1H), 6.84 (d,  $J = 2.7$  Hz, 1H), 6.74 (dd,  $J = 7.2, 2.7$  Hz, 1H), 4.10 (s, 2H), 3.47 (dt,  $J = 8.8, 6.5$  Hz, 4H), 2.00 (q,  $J = 3.4$  Hz, 4H).  $^{13}\text{C}$  NMR (101 MHz, DMSO)  $\delta$  154.9, 152.5, 139.5, 137.3, 129.2, 129.1, 127.5, 107.4, 106.7, 48.6, 38.58, 25.0. HRMS (ESI $^+$ ):  $m/z$  calcd  $\text{C}_{16}\text{H}_{19}\text{N}_2^+$ : 239.1543 [M+H] $^+$ ; found: 239.1547.

## References

- <sup>1</sup> F. C. Schaefer, G. A. Peters, *J. Org. Chem.* **1961**, *26*, 412-418.
- <sup>2</sup> E. Bejan, H. Ait-Haddou, J.-C. Daran, G. G. A. Balavoine, *Eur. J. Org. Chem.* **1998**, 2907-2912.
- <sup>3</sup> A. Maercker, K. S. Oeffner, U. Girreser, *Tetrahedron* **2004**, *60*, 8245-8256.

## NMR Spectra

# Ligand 13 <sup>1</sup>H NMR

nload\_20210117\_10\_NLL-bpyCAM\_HCl\_MeOD.10.fid  
NLL-bpyCAM HCl MeOD  
H1\_standard.UW MeOD 500 MHz

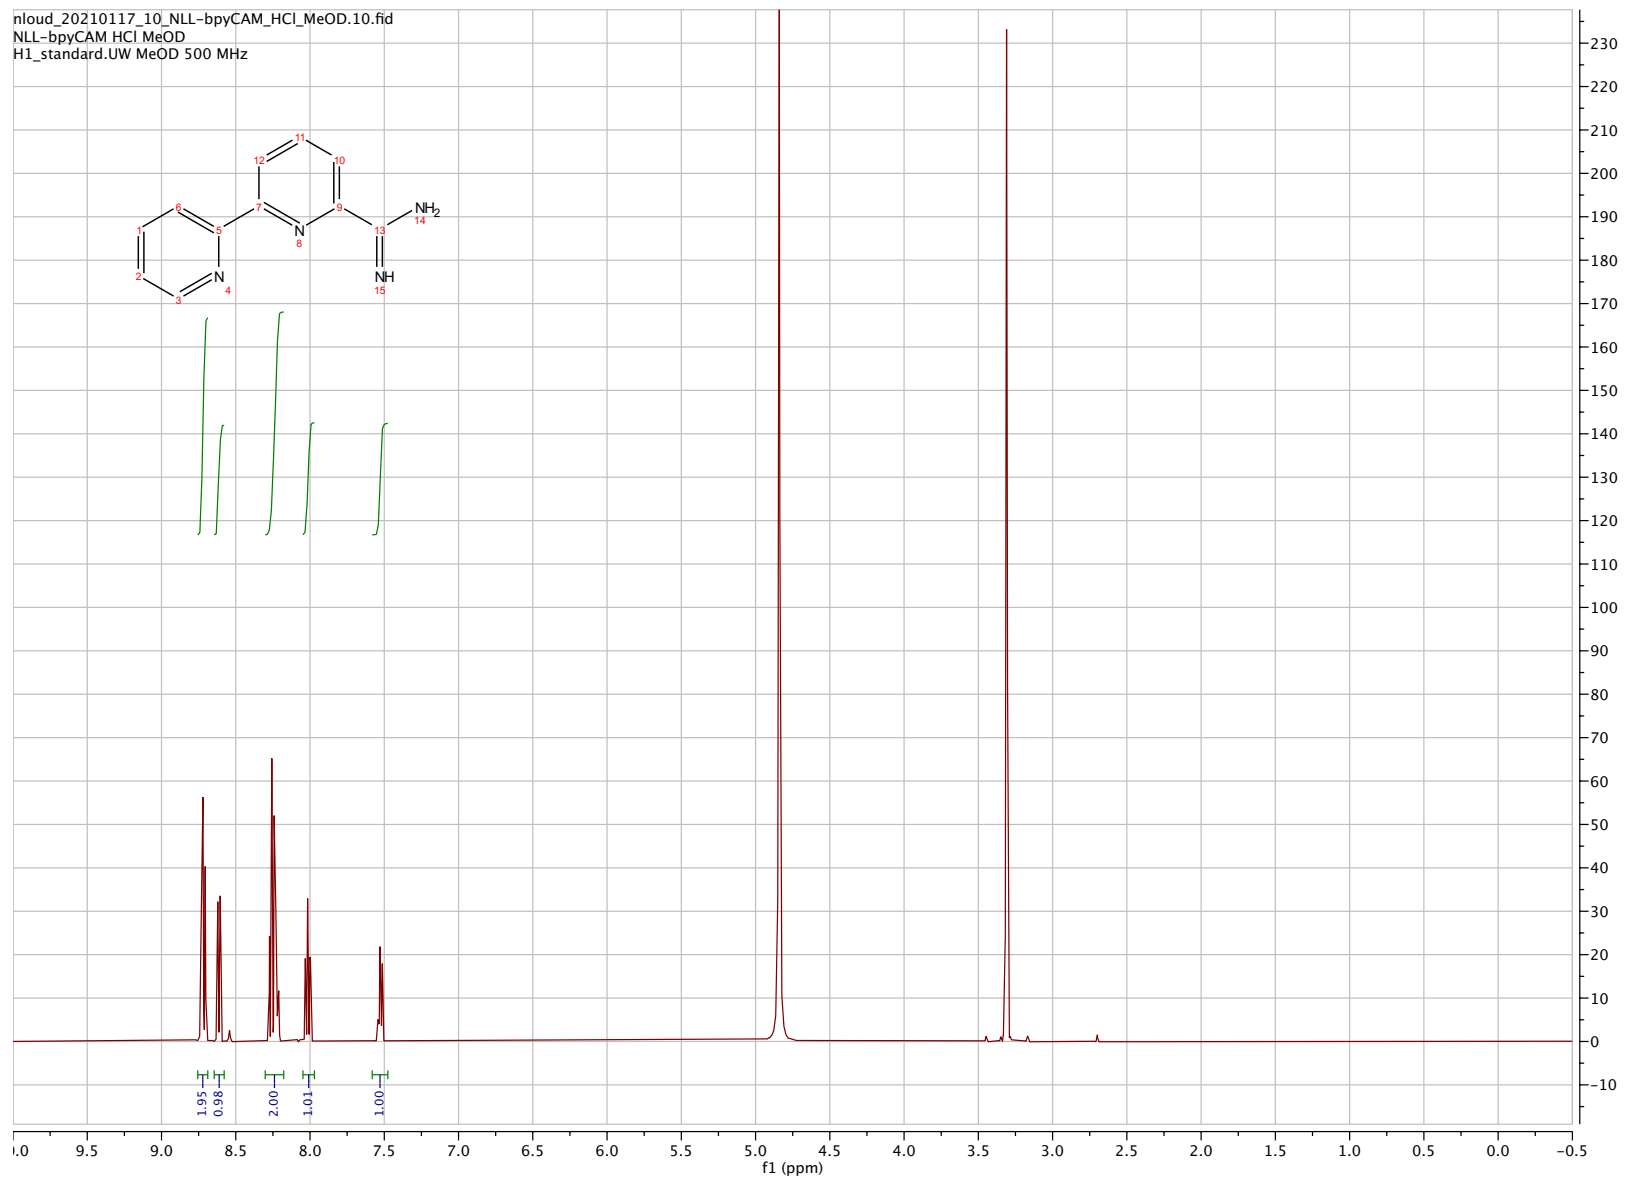

nload\_20201217\_10\_bpyCAM-HCl.10.fid  
bpyCAM-HCl  
H1\_standard.UW DMSO 500 MHz

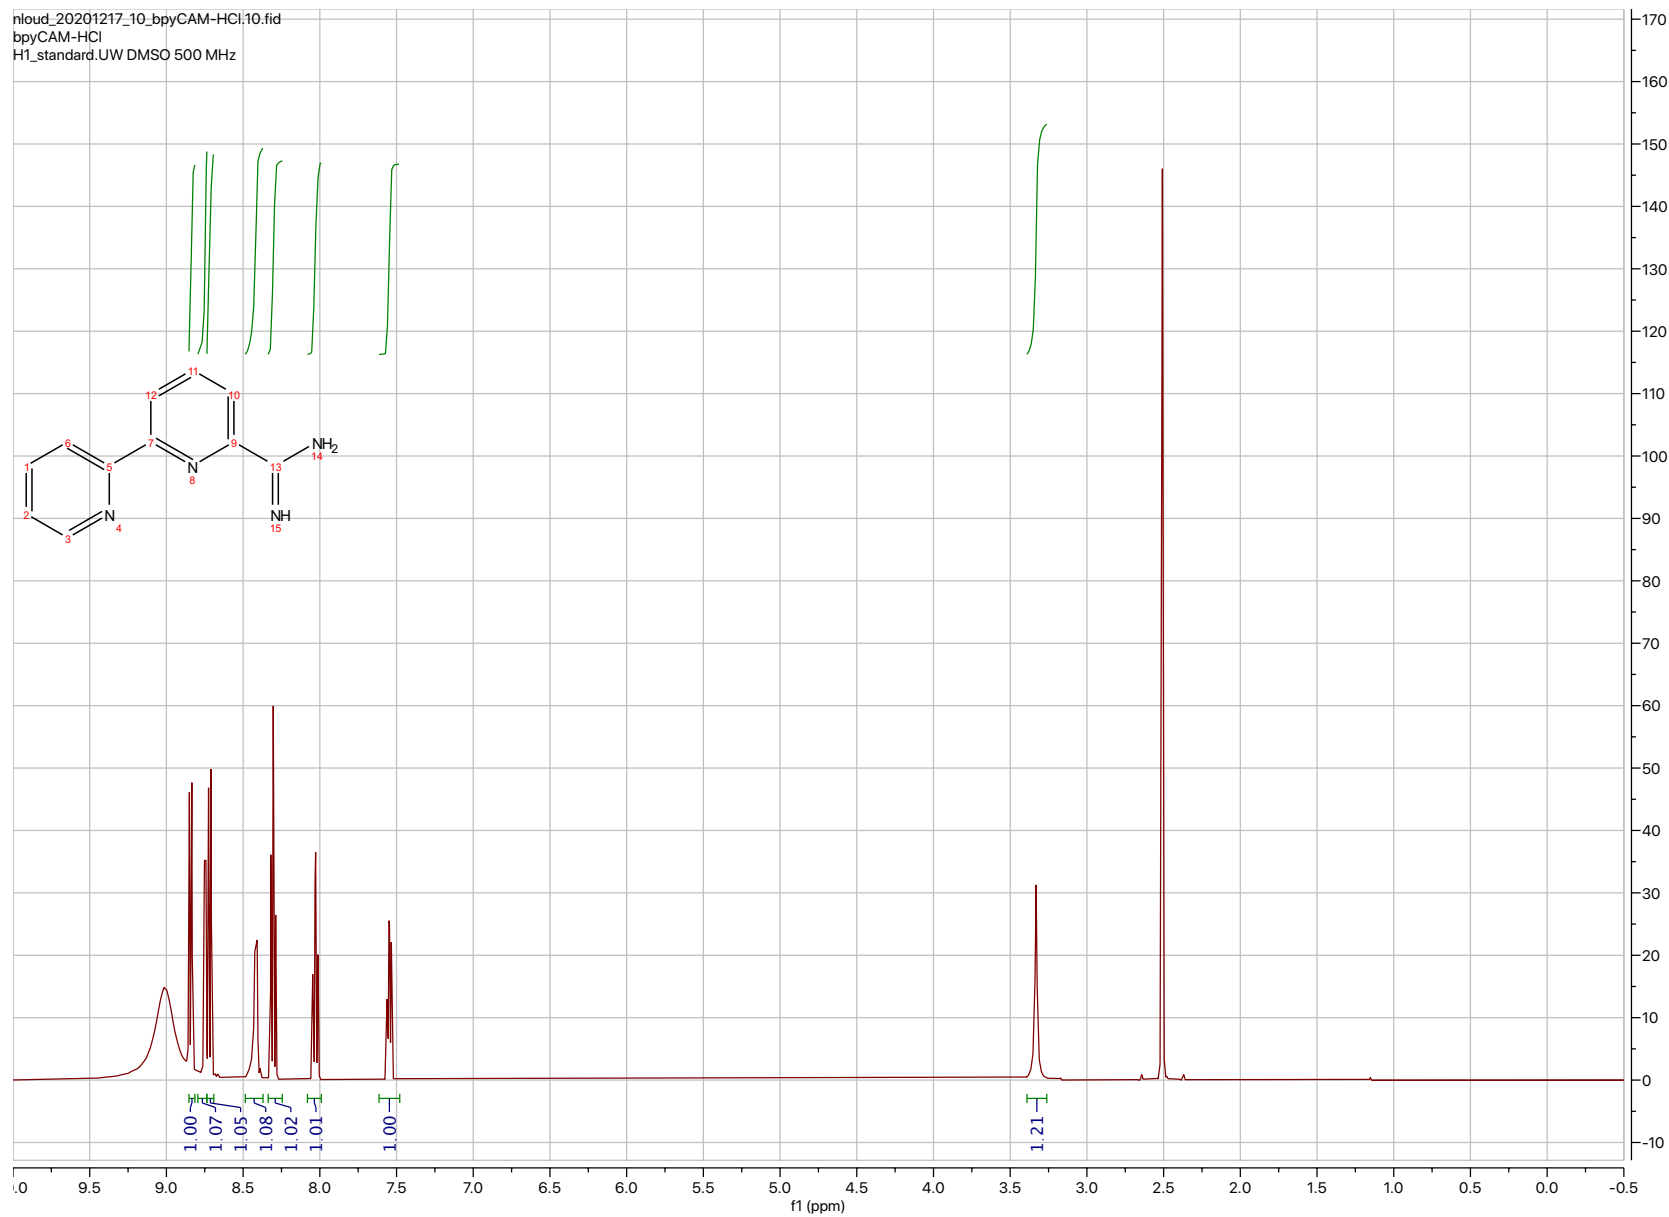

# Ligand 13 <sup>13</sup>C NMR

nload\_20210117\_11\_NLL-bpyCAM\_HCl\_MeOD.11.fid  
NLL-bpyCAM HCl MeOD  
C13\_standard.UW MeOD 126 MHz

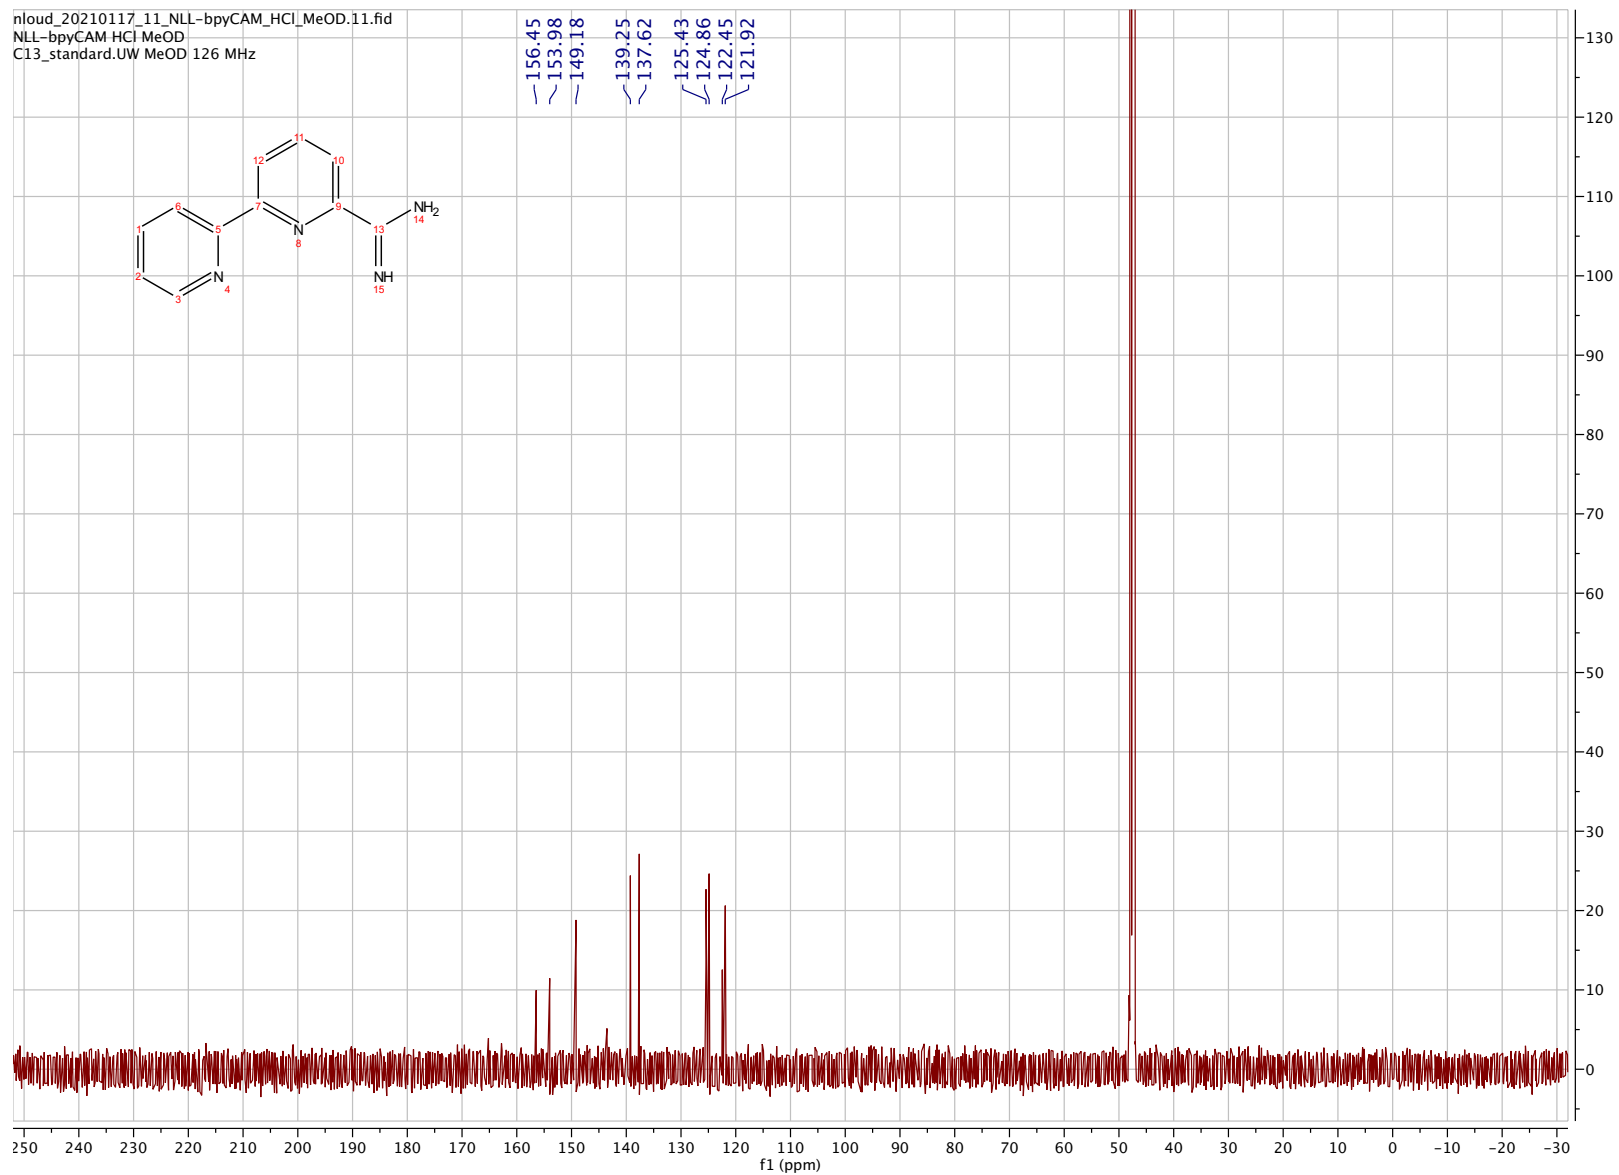

nloud\_20201217\_11\_bpyCAM-HCl.11.fid  
bpyCAM-HCl  
C13\_standard.UW DMSO 126 MHz

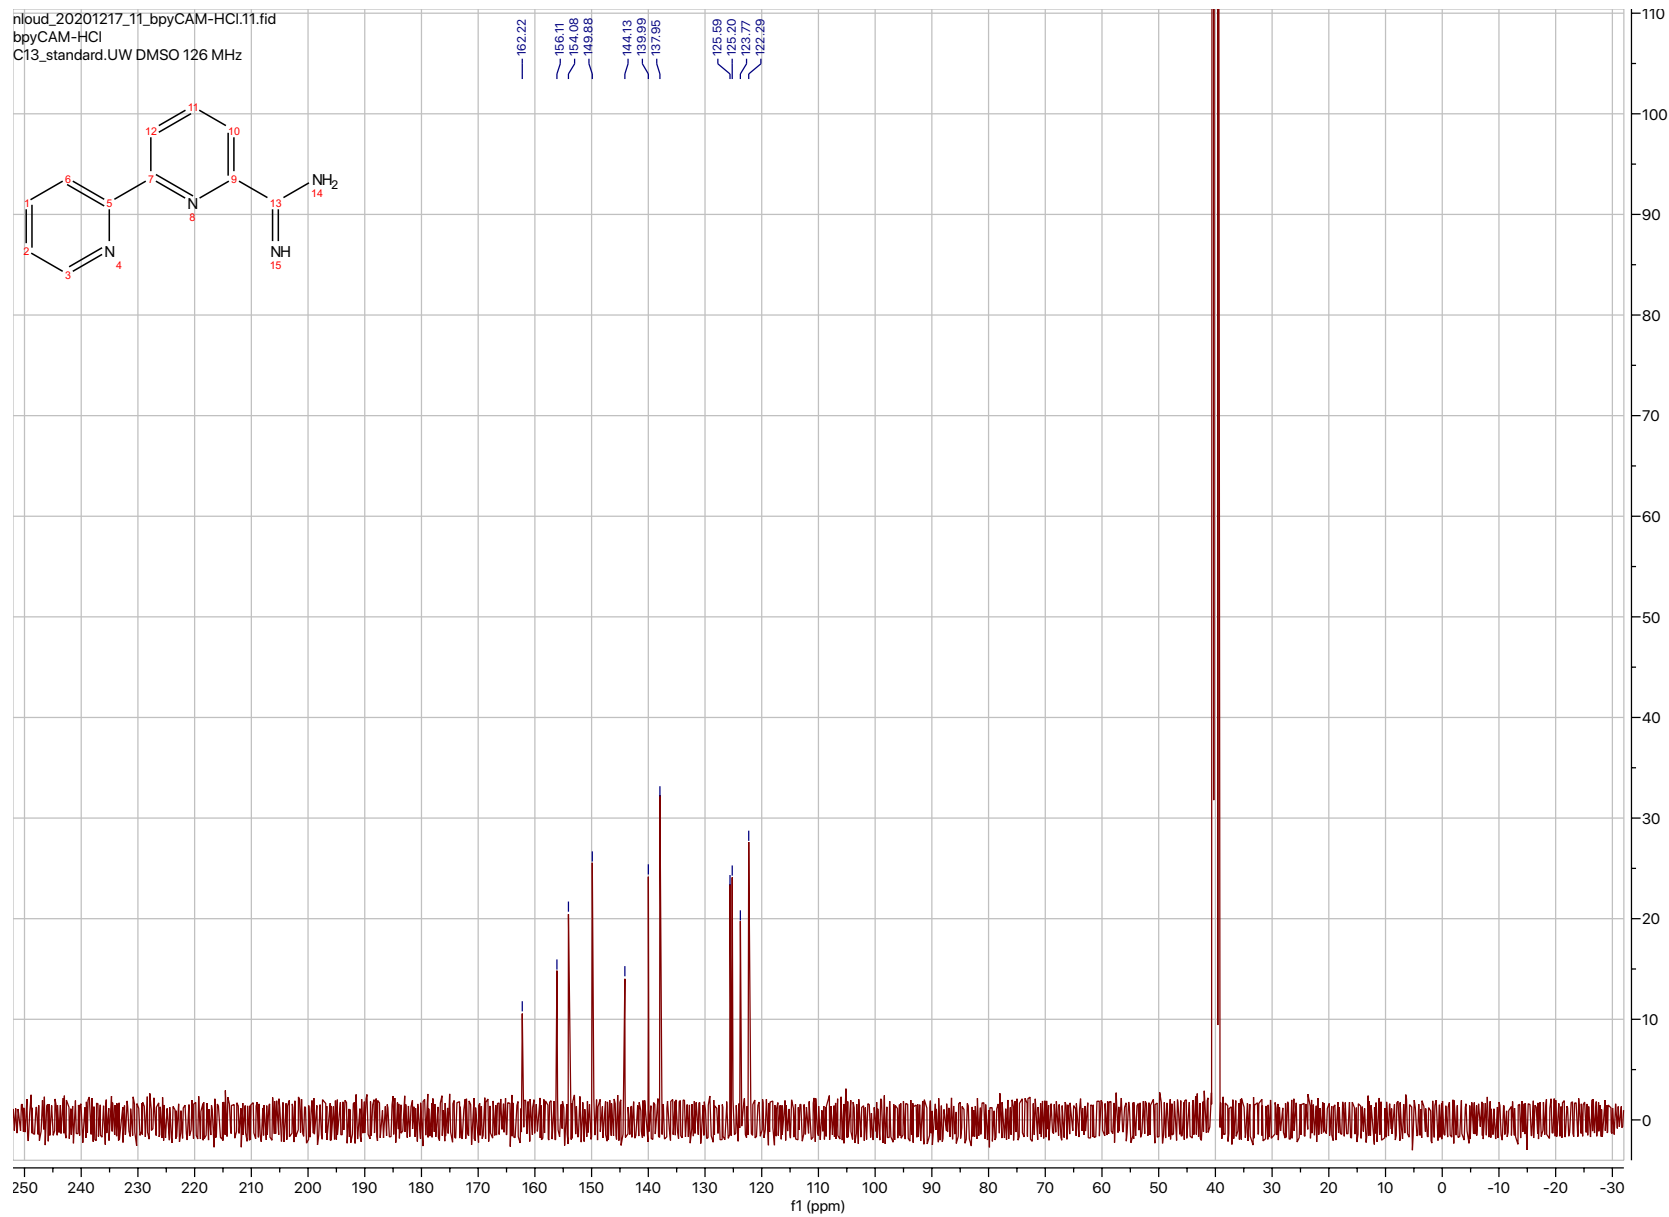



# Compound 2 <sup>1</sup>HNMR

3673582  
310198107001-2217-2-1 in DMSO  $\delta$ 29 BC8020 0.5mg  
Temp = 90 C  
C16H20N2O  
mr400  
Acq: VnmrJ VERSION 3.2 REVISION A/mr400

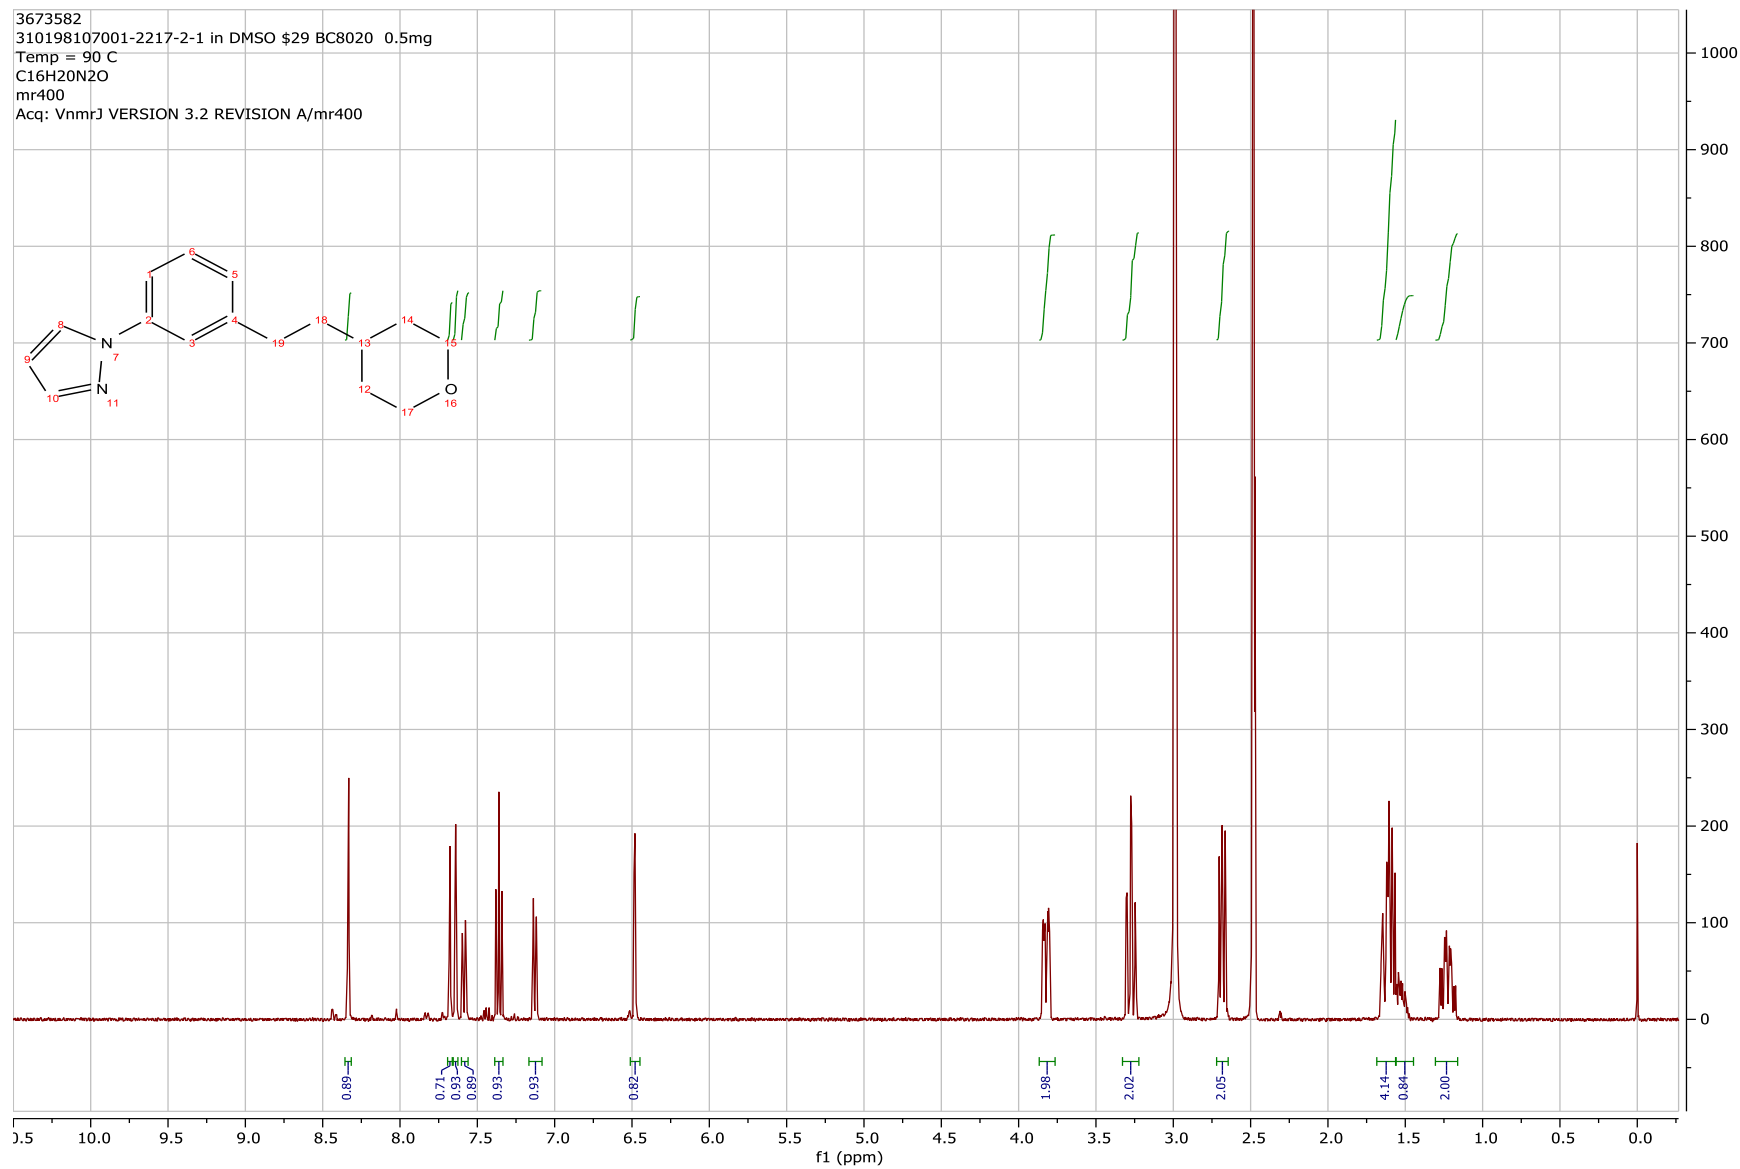

# Compound 2 <sup>13</sup>C NMR

3979927.brk.1.fid  
310198107001-2217-2-1 in DMSO \$20 BC2643 5mg

C16H20N2O  
s400

Acq:topspin3.6.1/s400

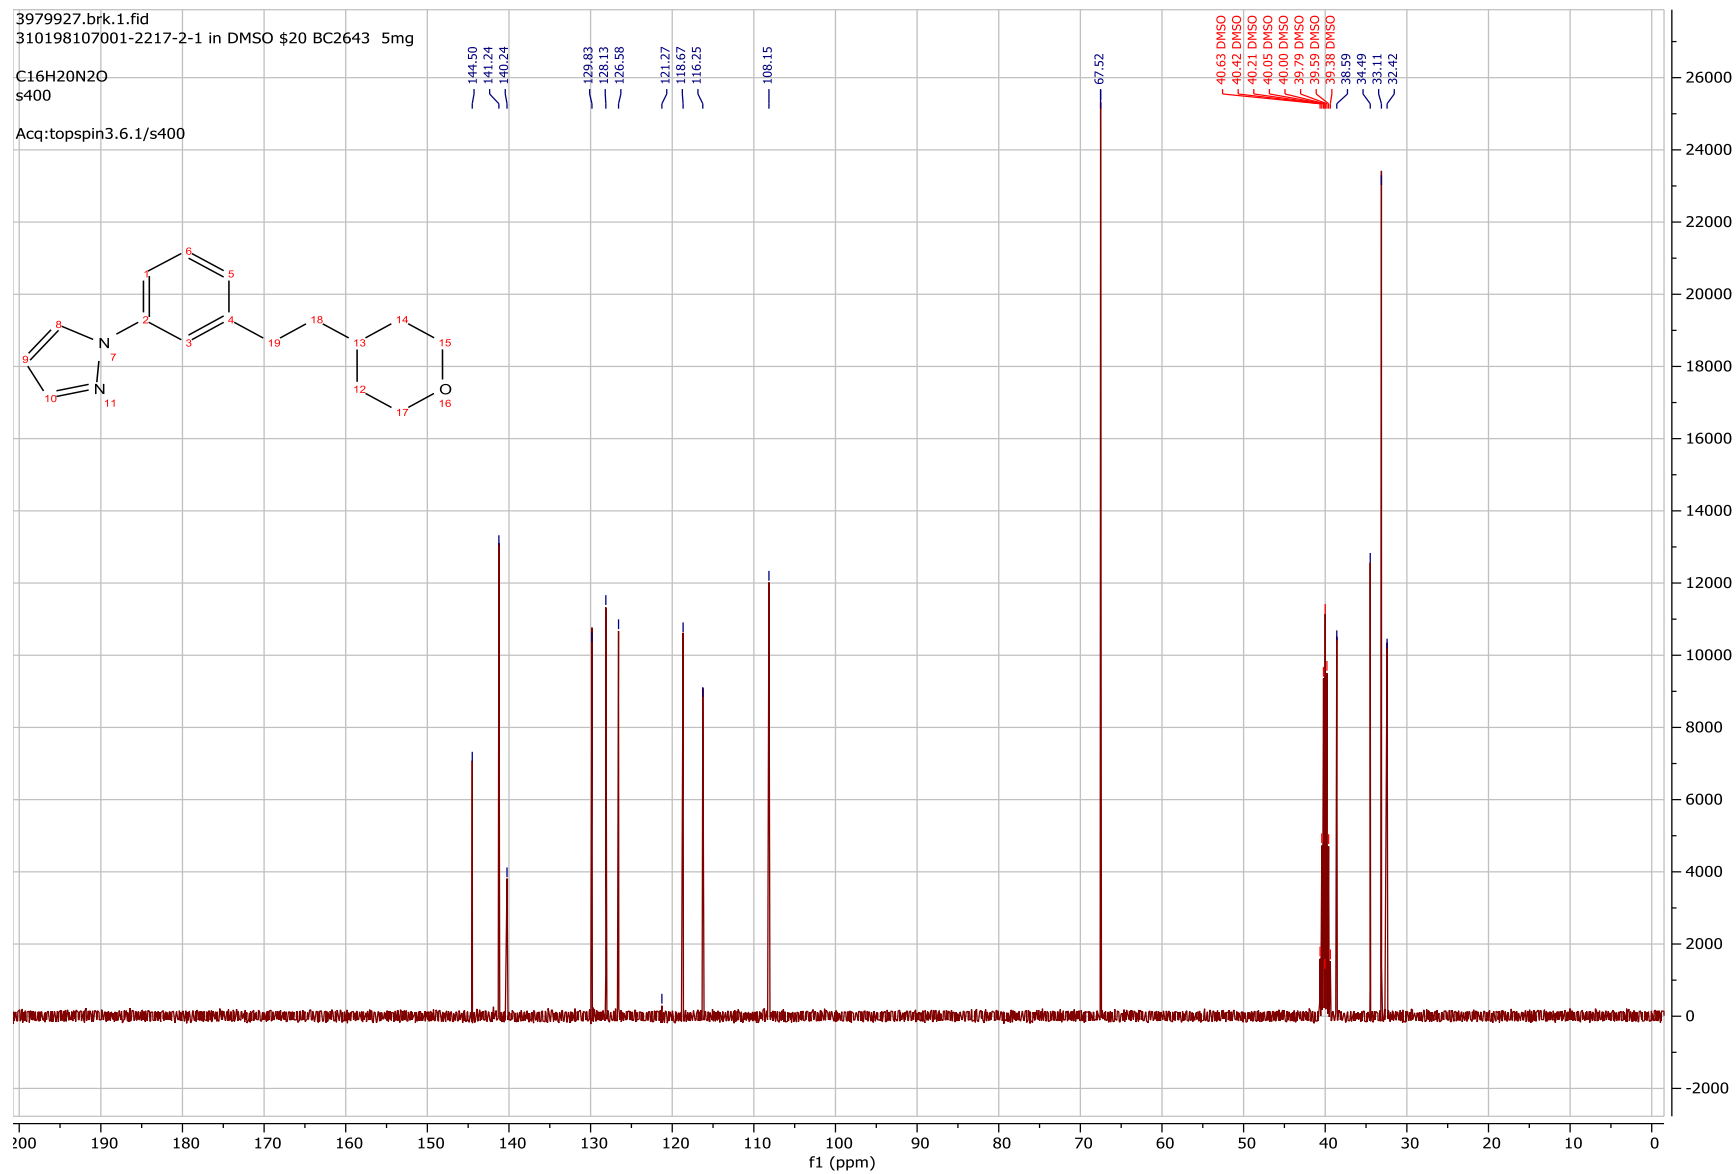

# Compound 16 <sup>1</sup>H NMR

3765009  
310198107001-2315-2-1 in DMSO  $\delta$ 17 BC9341 0.5mg  
Temp = 90 C  
C<sub>15</sub>H<sub>17</sub>N<sub>3</sub>O  
mr400  
Acq: VnmrJ VERSION 3.2 REVISION A/mr400

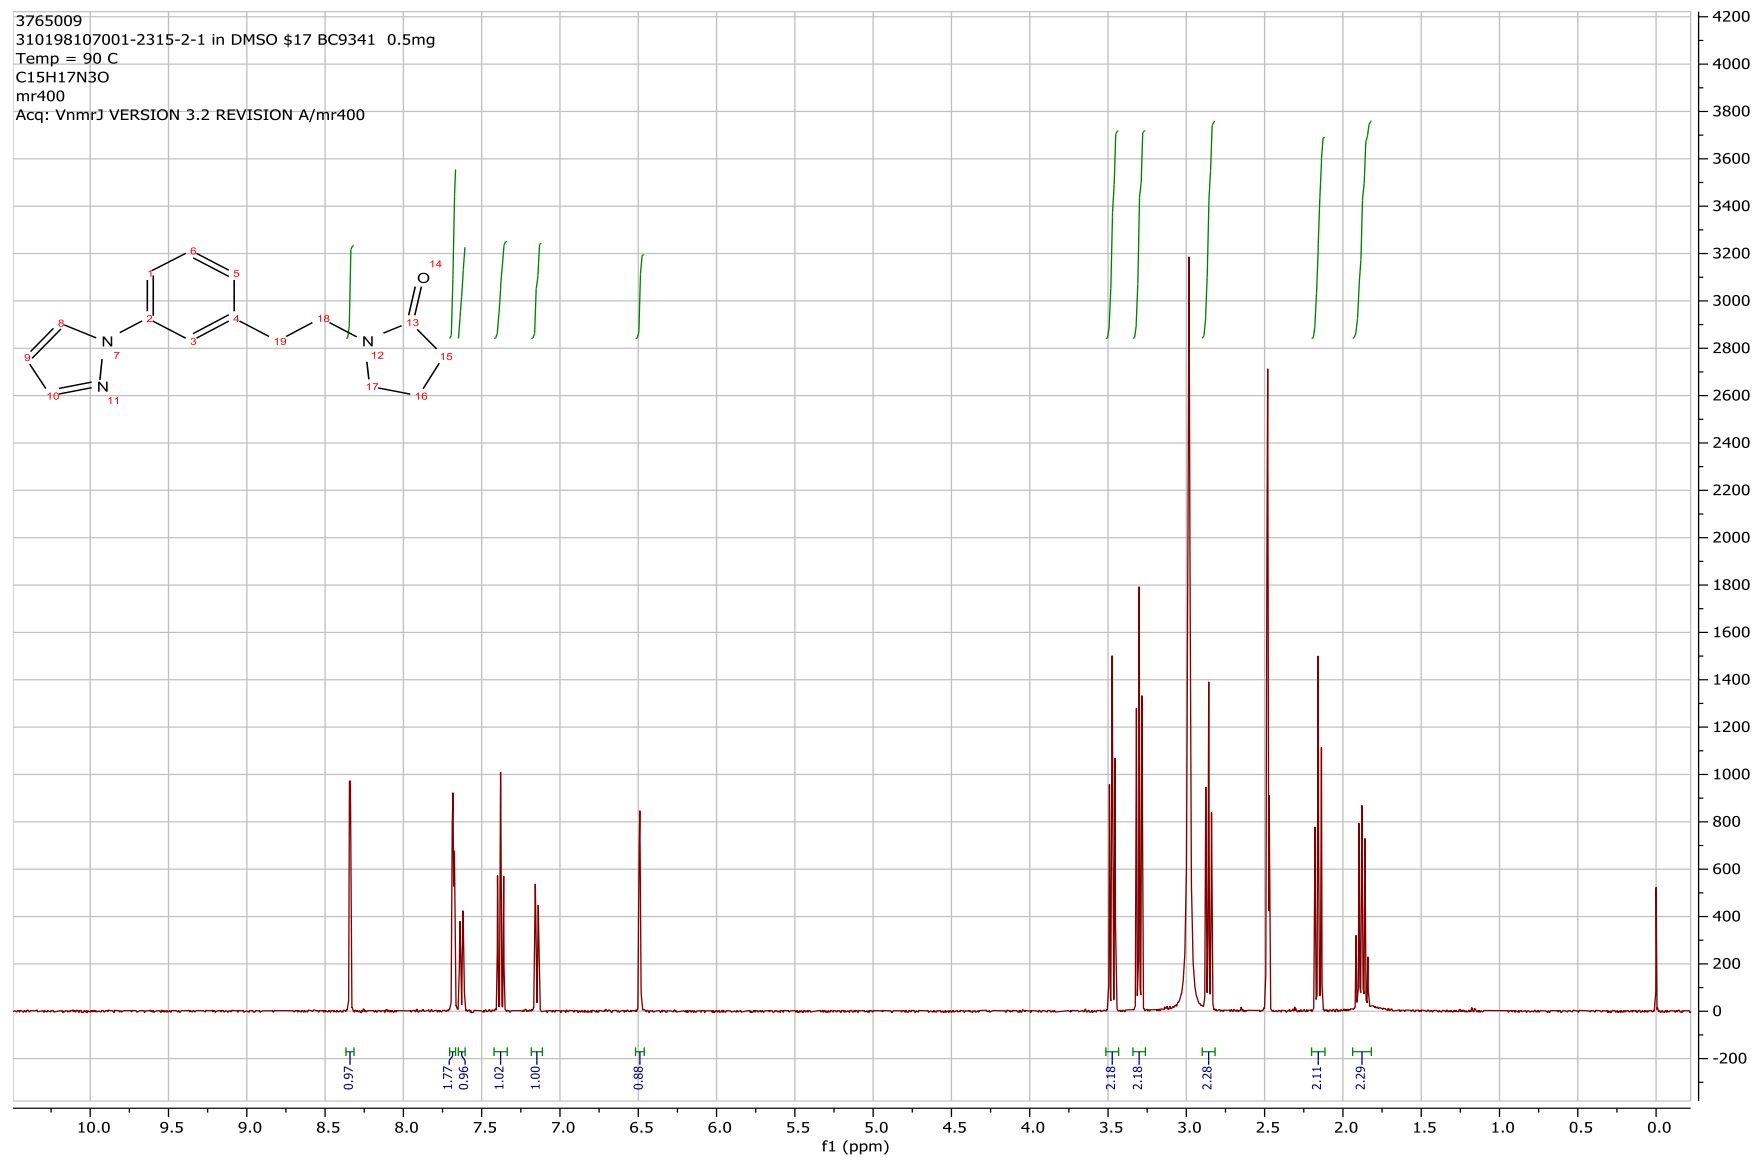

# Compound 16 <sup>13</sup>C NMR

3978067  
310198107001-2315-2-1 in DMSO \$19 BC2626 7.89mg  
Temp = 27 C  
C15H17N3O1  
mrs400  
Acq: VnmrJ VERSION 3.2 REVISION A/mrs400

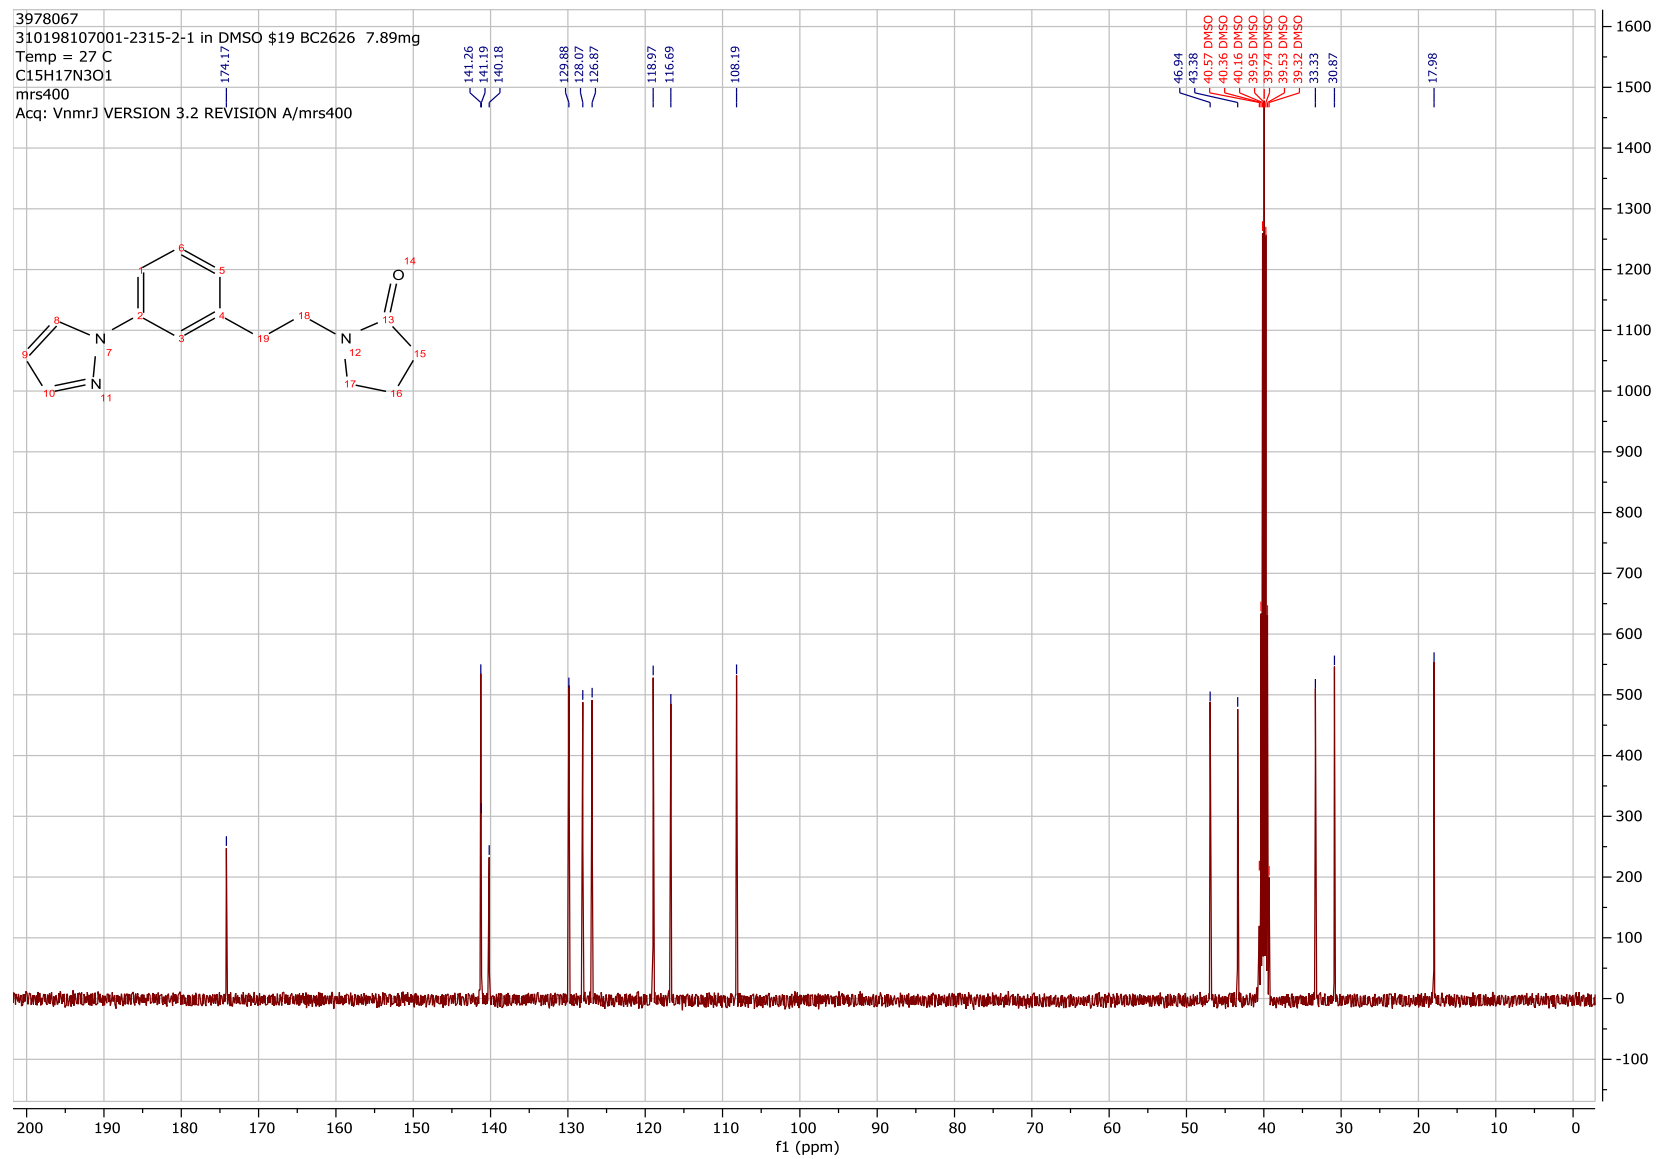

# Compound 17 <sup>1</sup>H NMR

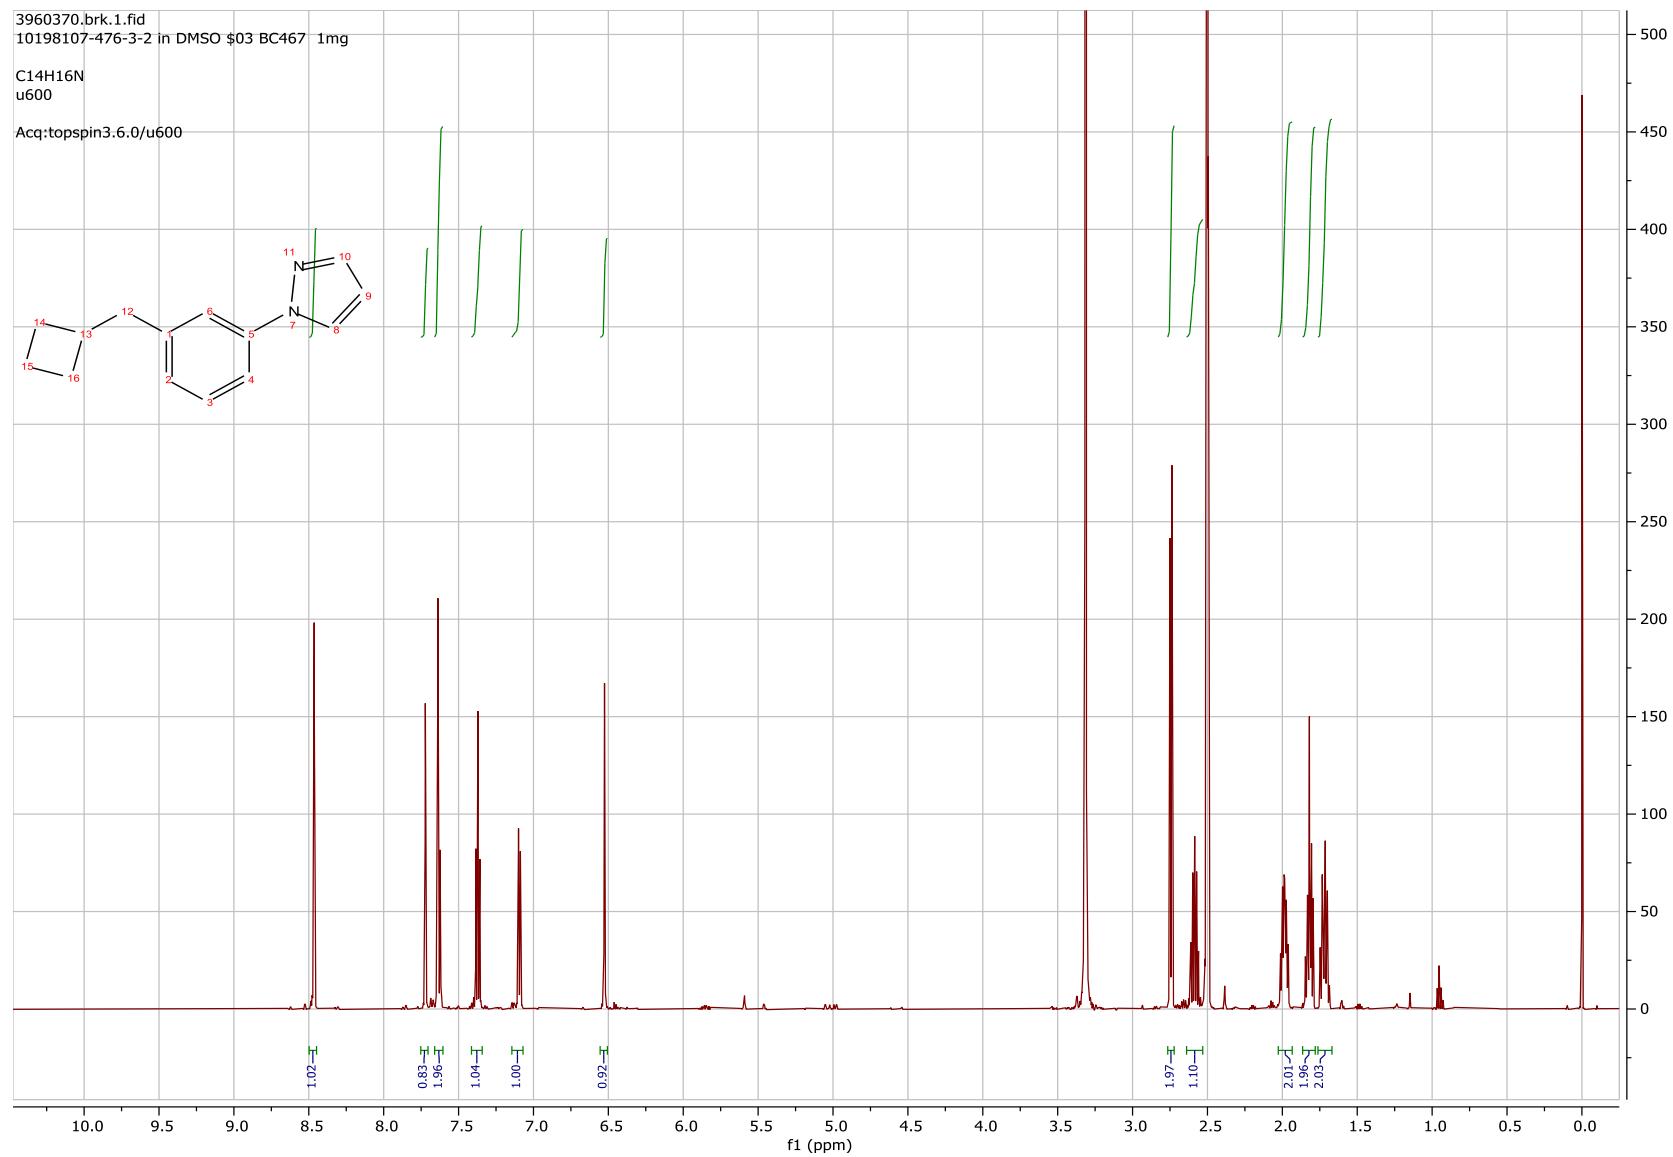

# Compound 17 <sup>13</sup>C NMR

3994737.brk.1.fid  
10198107-476-4-1 in DMSO  $\phi$ 02 BC2658 10.2mg

C14H16N  
s400

Acq:topspin3.6.1/s400

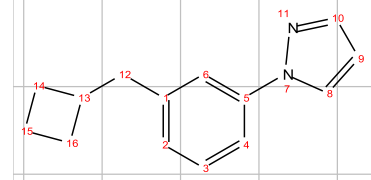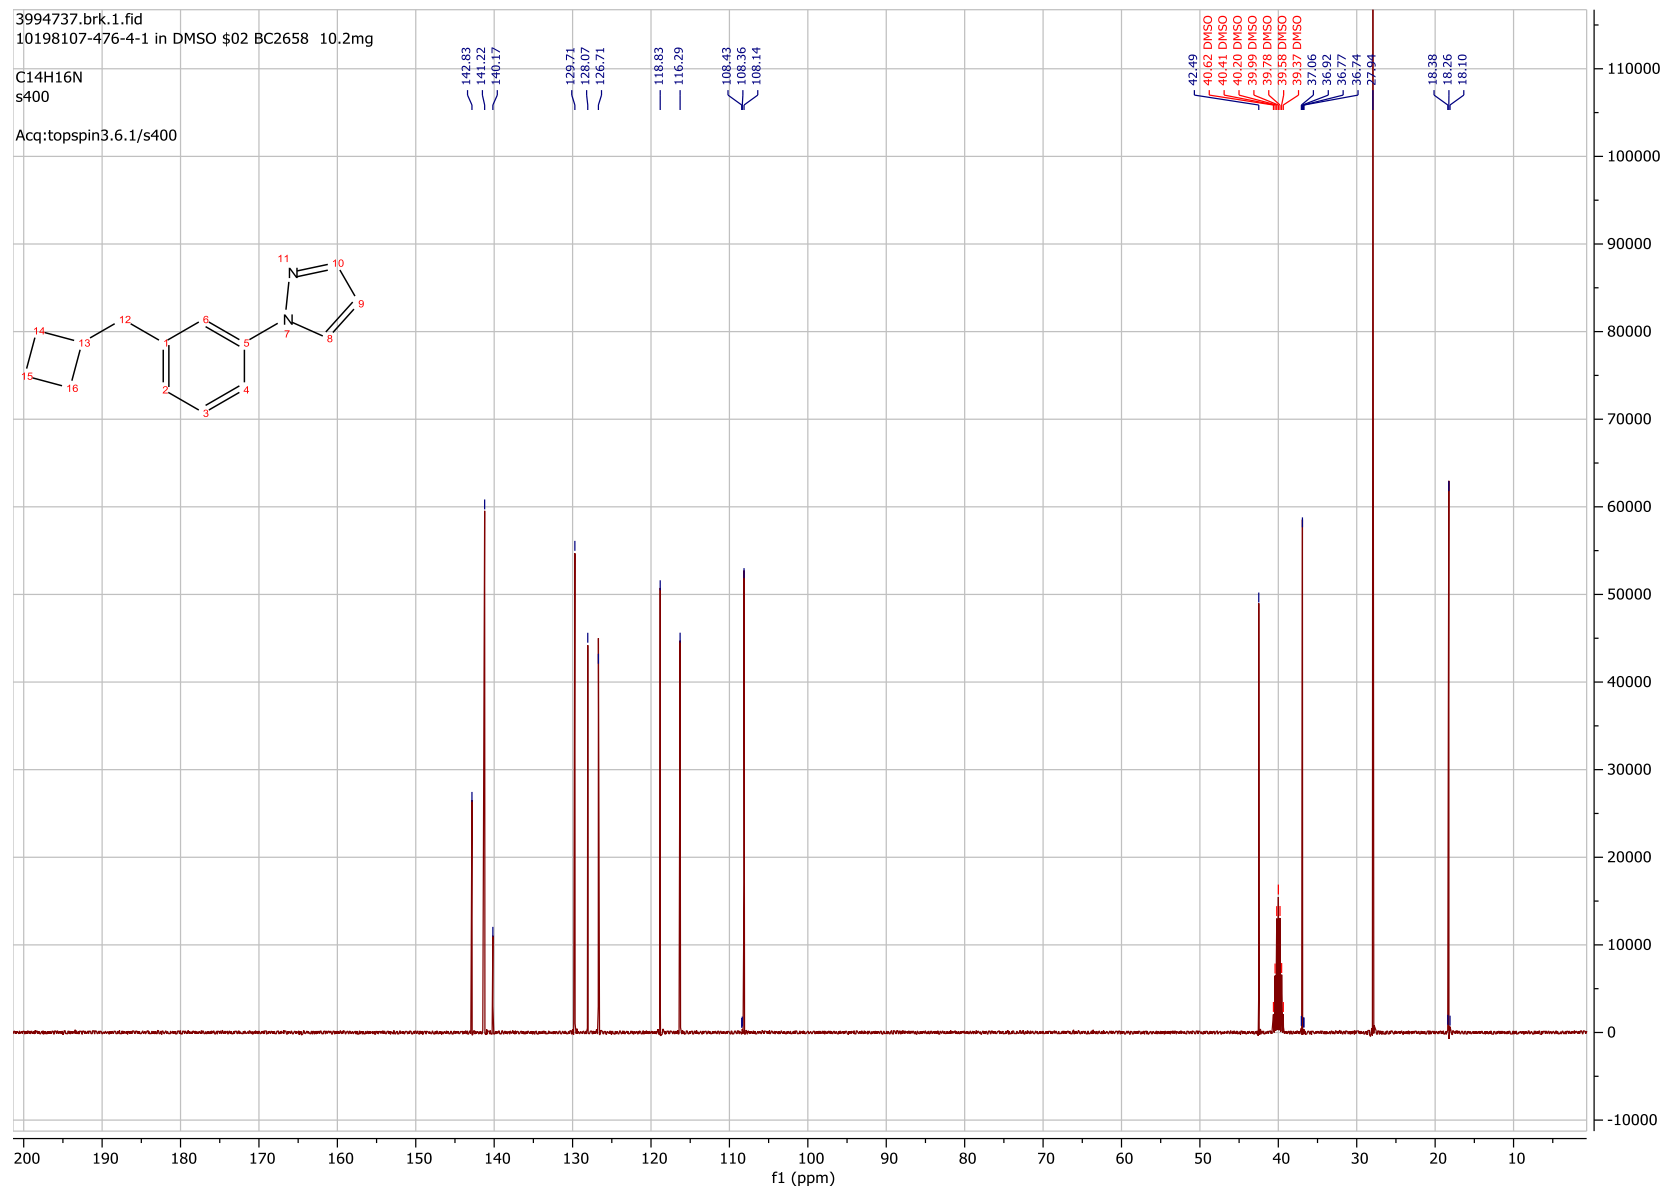

# Compound 19 <sup>1</sup>HNMR

hloud\_20201208\_10\_NLL-0-047A.10.fid  
NLL-0-047A  
H1\_standard.UW CDCl<sub>3</sub> 500 MHz

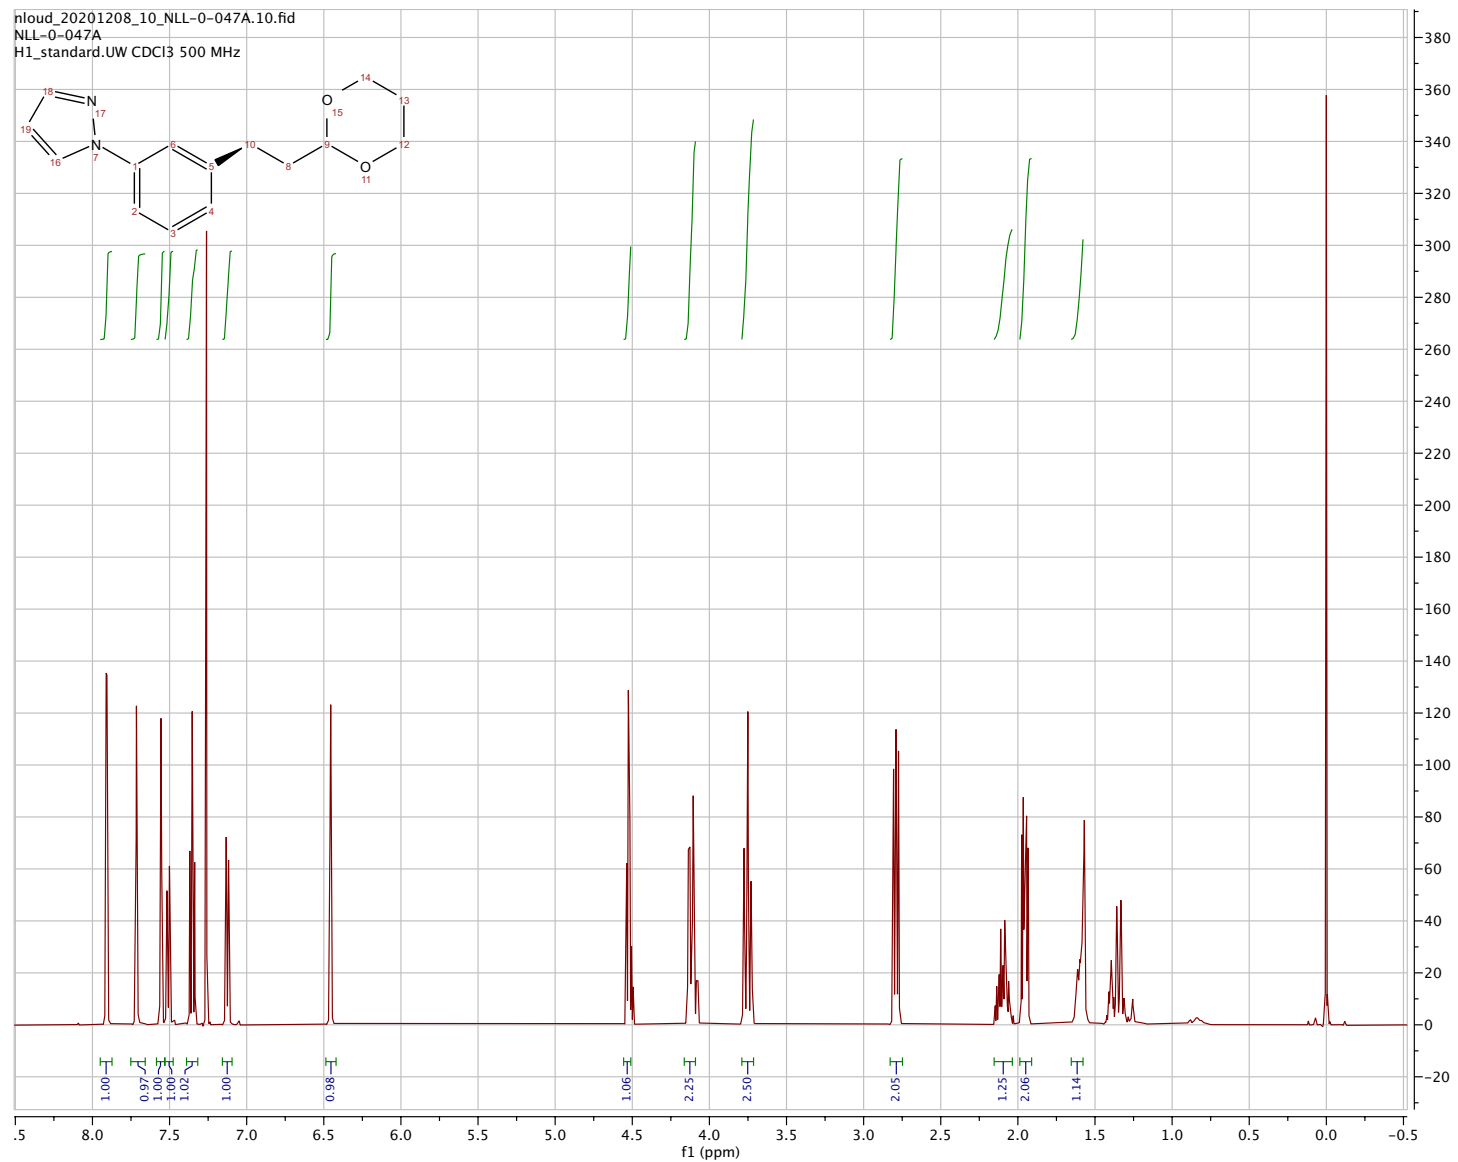

# Compound 19 <sup>13</sup>C NMR

nload\_20201208\_11\_NLL-0-047A.11.fid  
NLL-0-047A  
C13\_standard.UW CDCl3 126 MHz

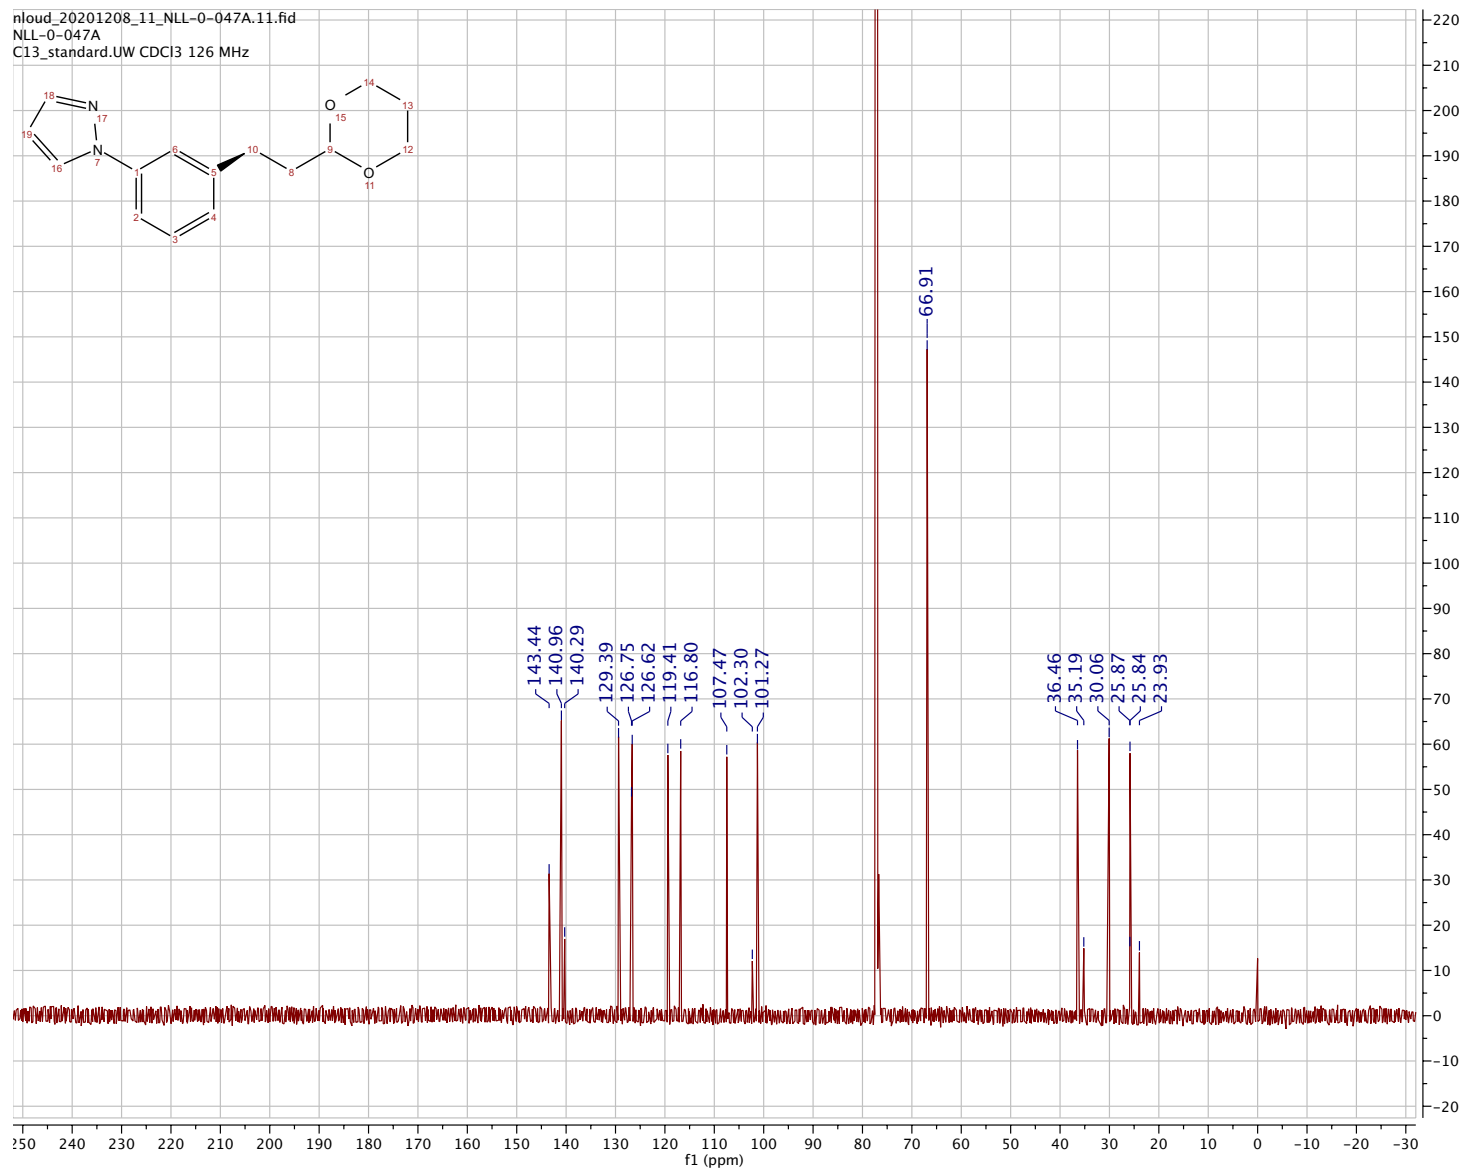



# Compound 23 <sup>1</sup>H NMR

3765014  
310198107001-2315-4-1 in DMSO  $\delta$ 17 BC9343 0.5mg  
Temp = 90 C  
C<sub>14</sub>H<sub>16</sub>N<sub>2</sub>O  
mr400  
Acq: VnmrJ VERSION 3.2 REVISION A/mr400

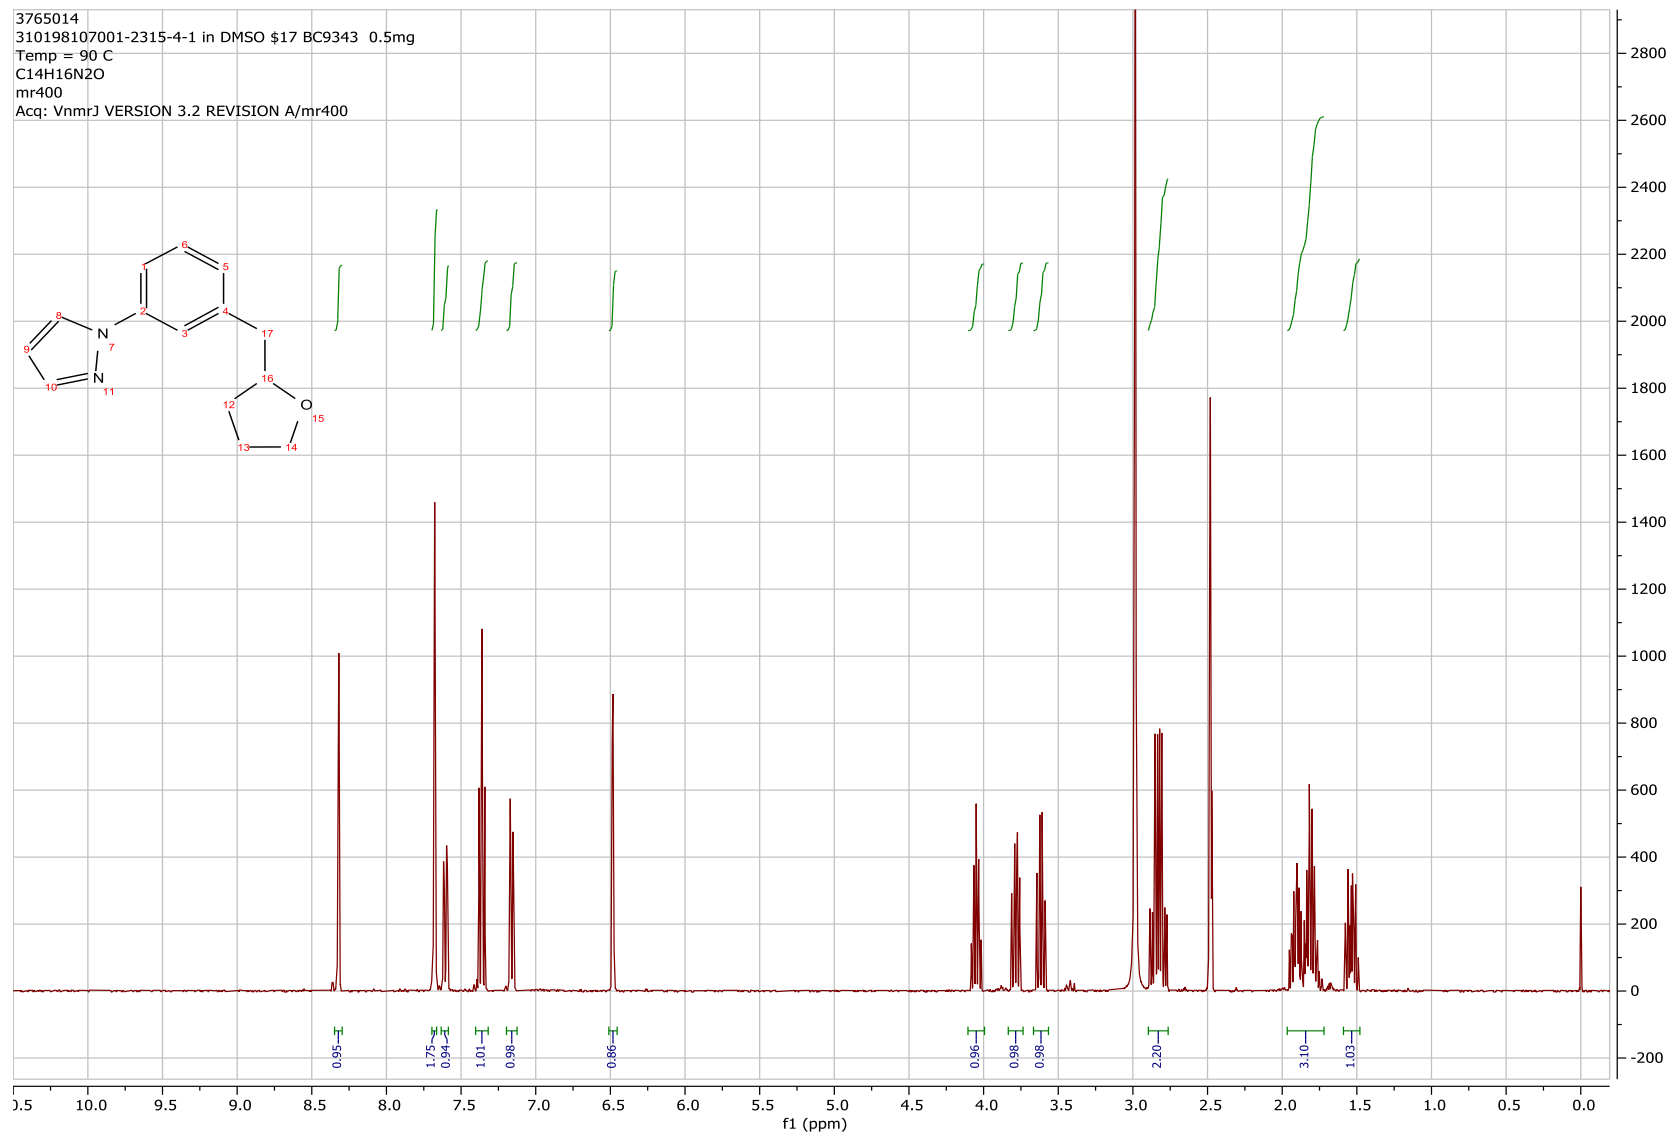

# Compound 23 <sup>13</sup>C NMR

3978168  
310198107001-2315-4-1 in DMSO \$19 BC2627 9mg  
Temp = 27 C  
C14H16N2O1  
mrs400  
Acq: VnmrJ VERSION 3.2 REVISION A/mrs400

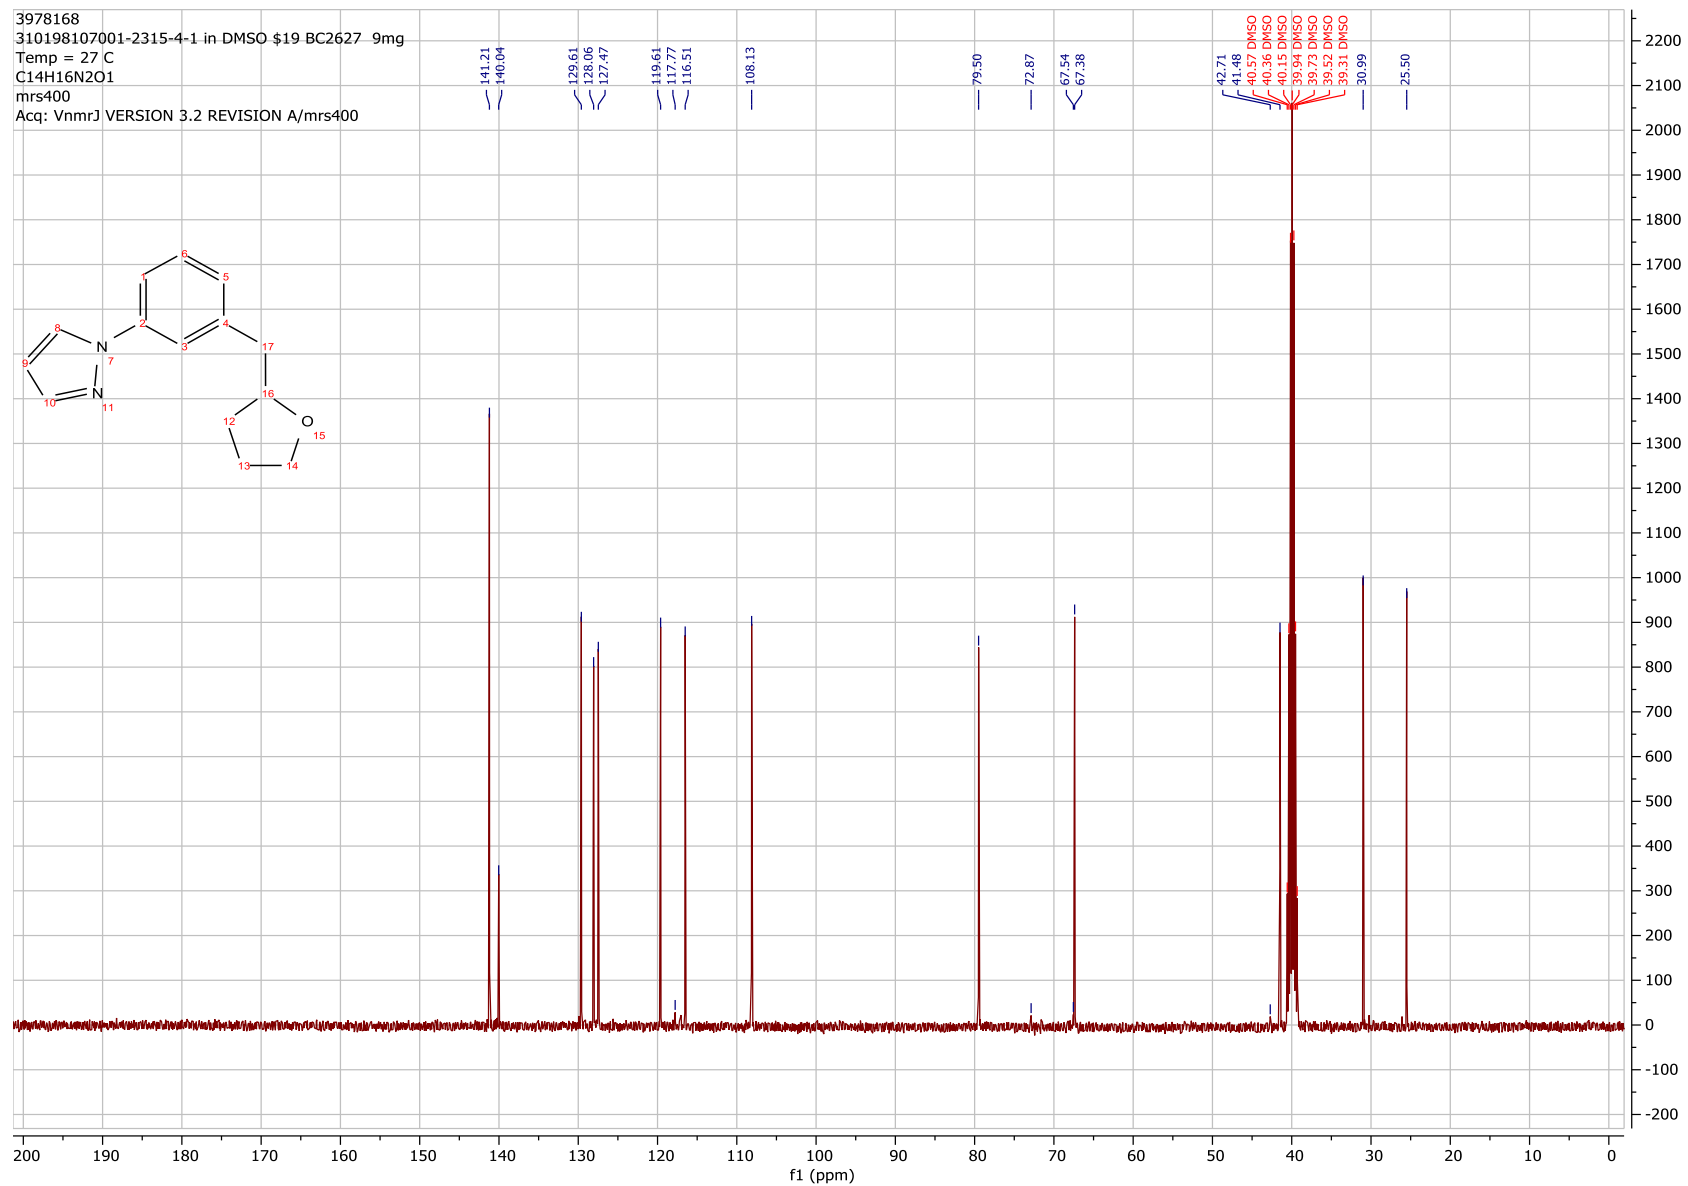

# Compound 24 <sup>1</sup>HNMR

3765015  
310198107001-2315-5-1 in DMSO  $\delta$ 17 BC9344 0.5mg  
Temp = 90 C  
C13H14N2  
mr400  
Acq: VnmrJ VERSION 3.2 REVISION A/mr400

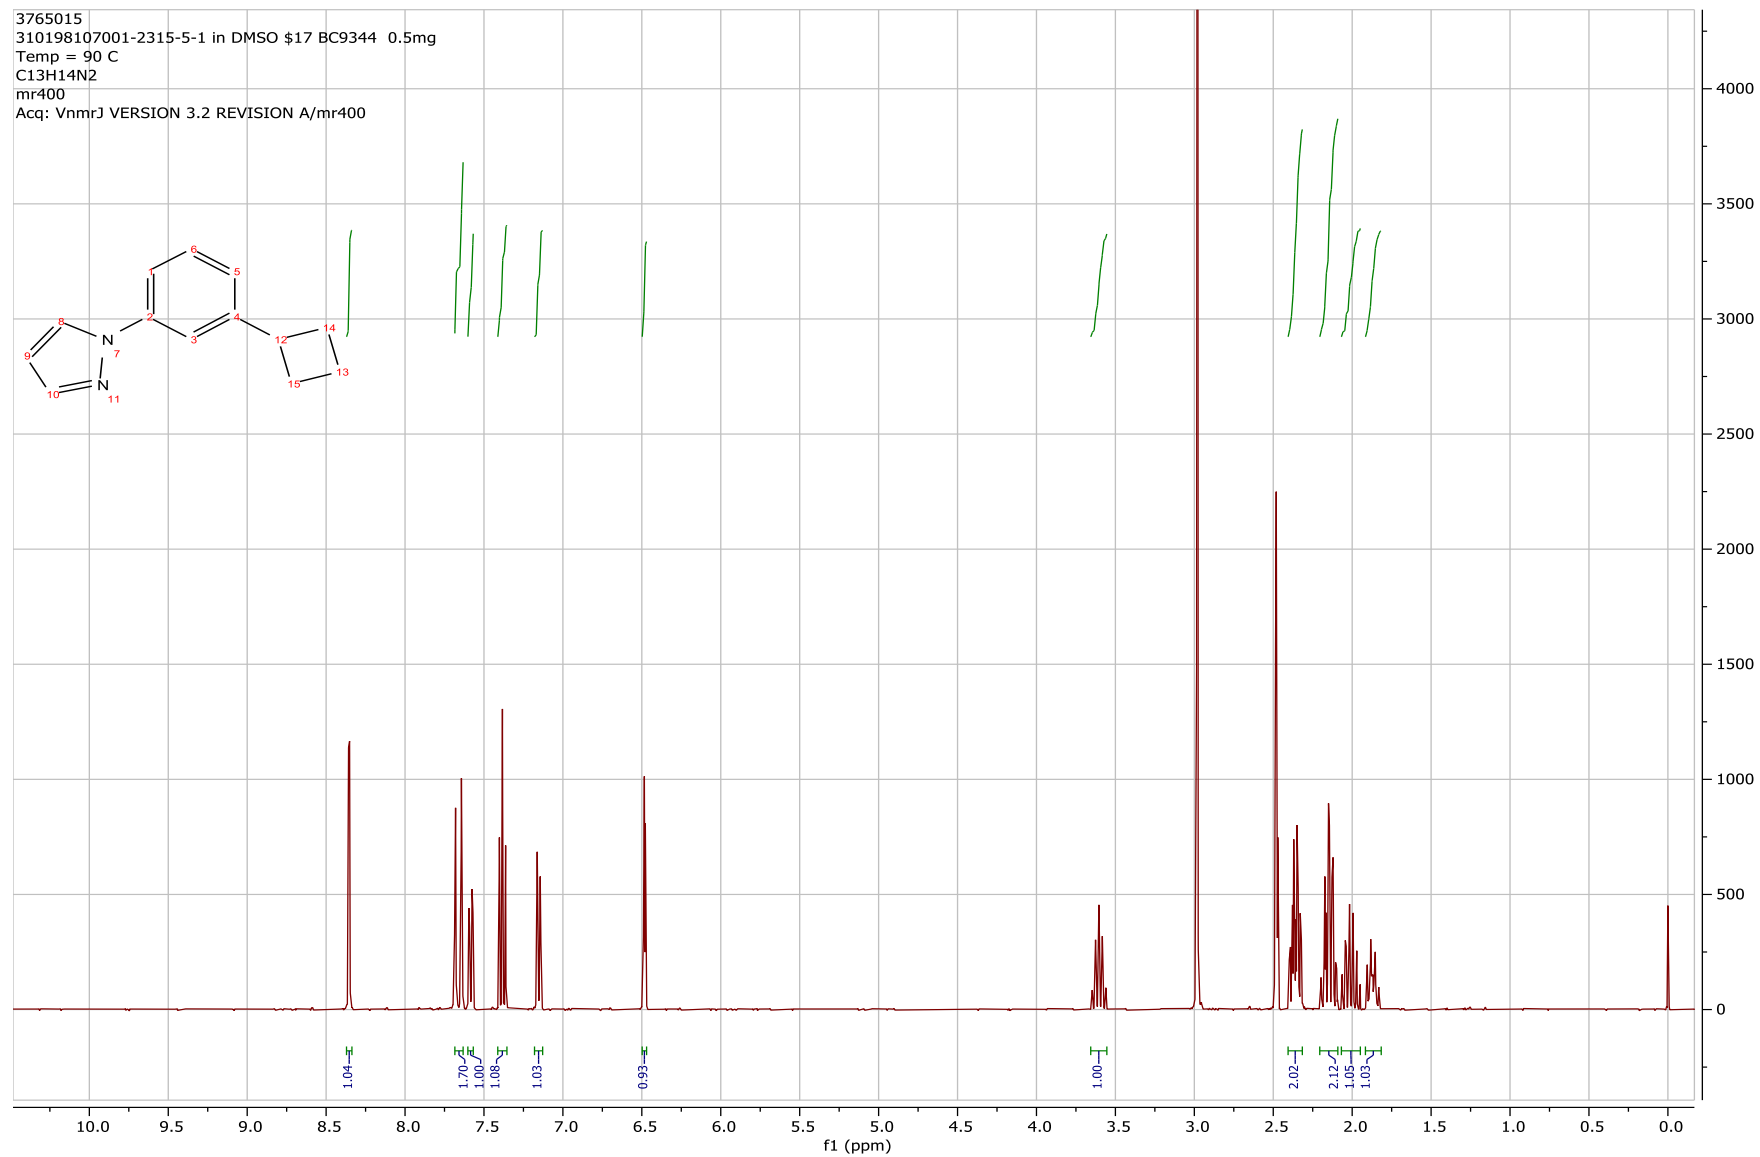

# Compound 24 <sup>13</sup>C NMR

3978278  
310198107001-2315-5-1 in DMSO \$19 BC2628 9mg  
Temp = 27 C  
C13H14N2  
mrs400  
Acq: VnmrJ VERSION 3.2 REVISION A/mrs400

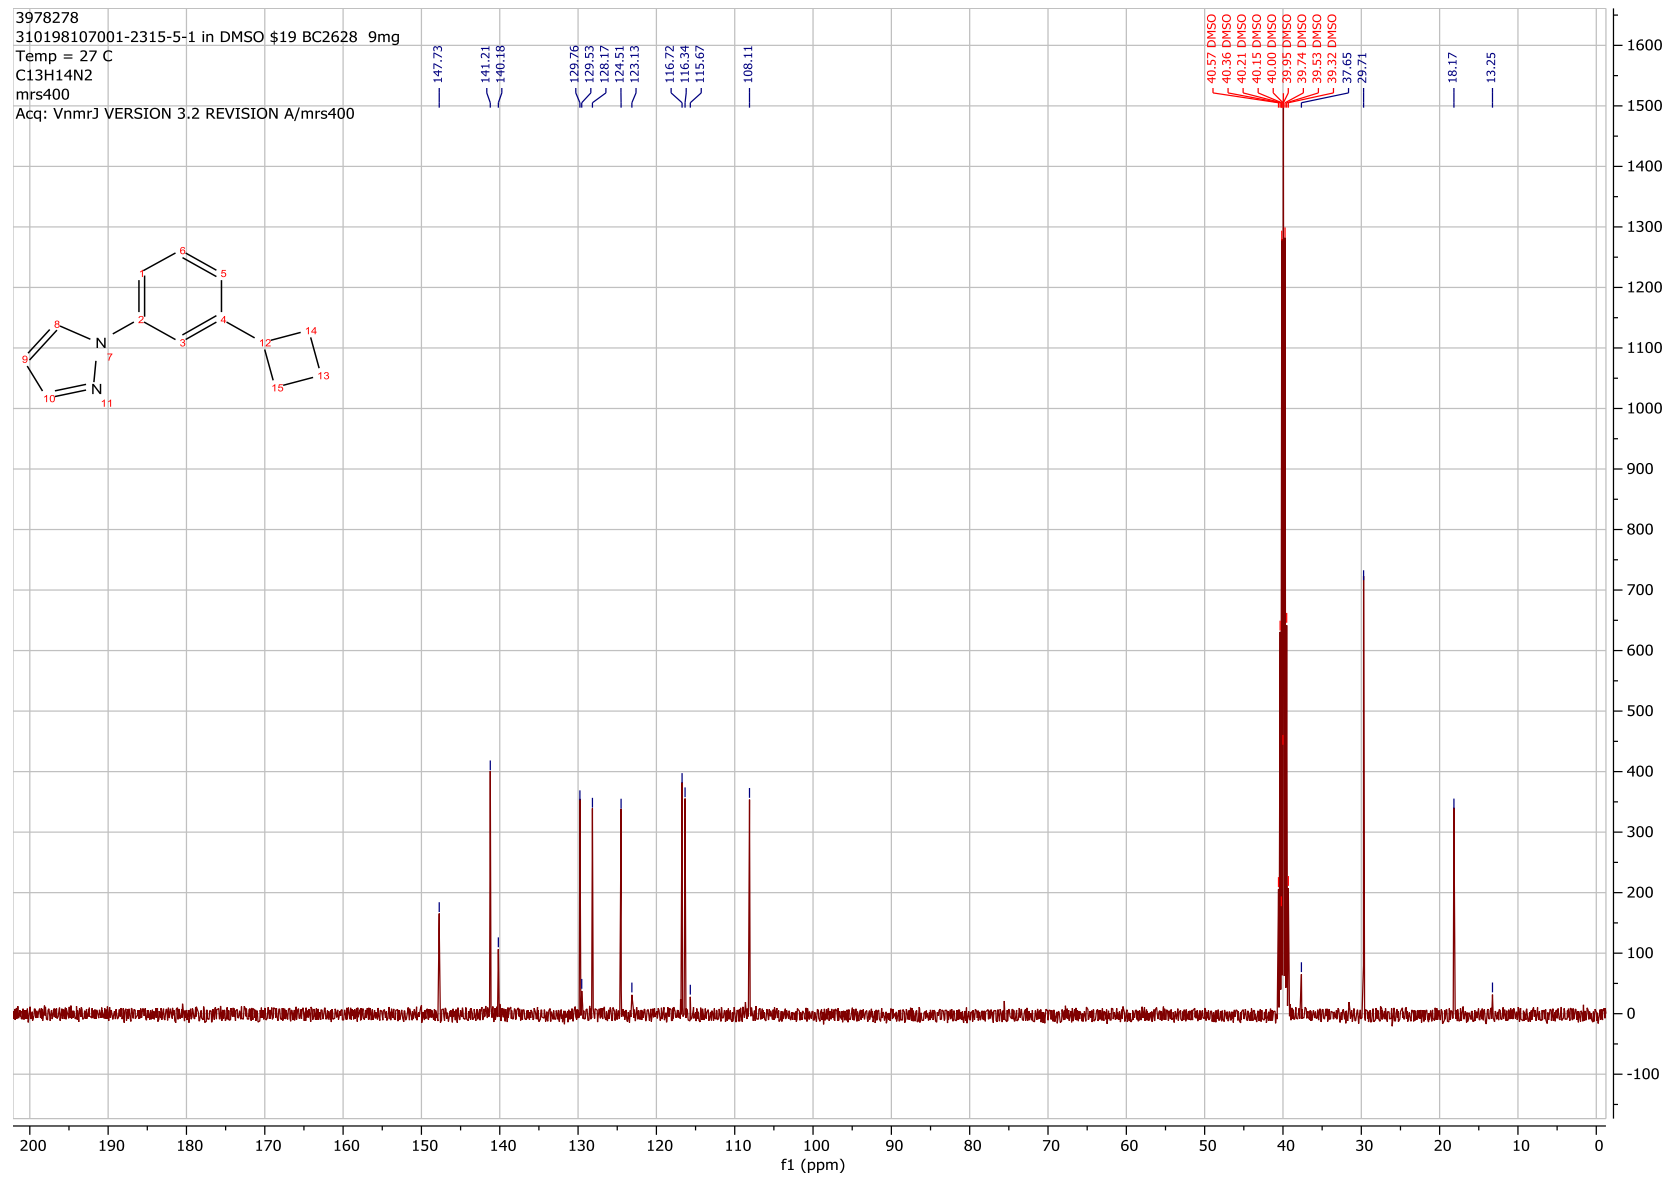

# Compound 35 <sup>1</sup>HNMR

3967573.brk.1.fid  
10198107-477-2-1 in DMSO  $\delta$ 10 BC1471 1.06mg

C20H20N2O  
u600

Acq:topspin3.6.0/u600

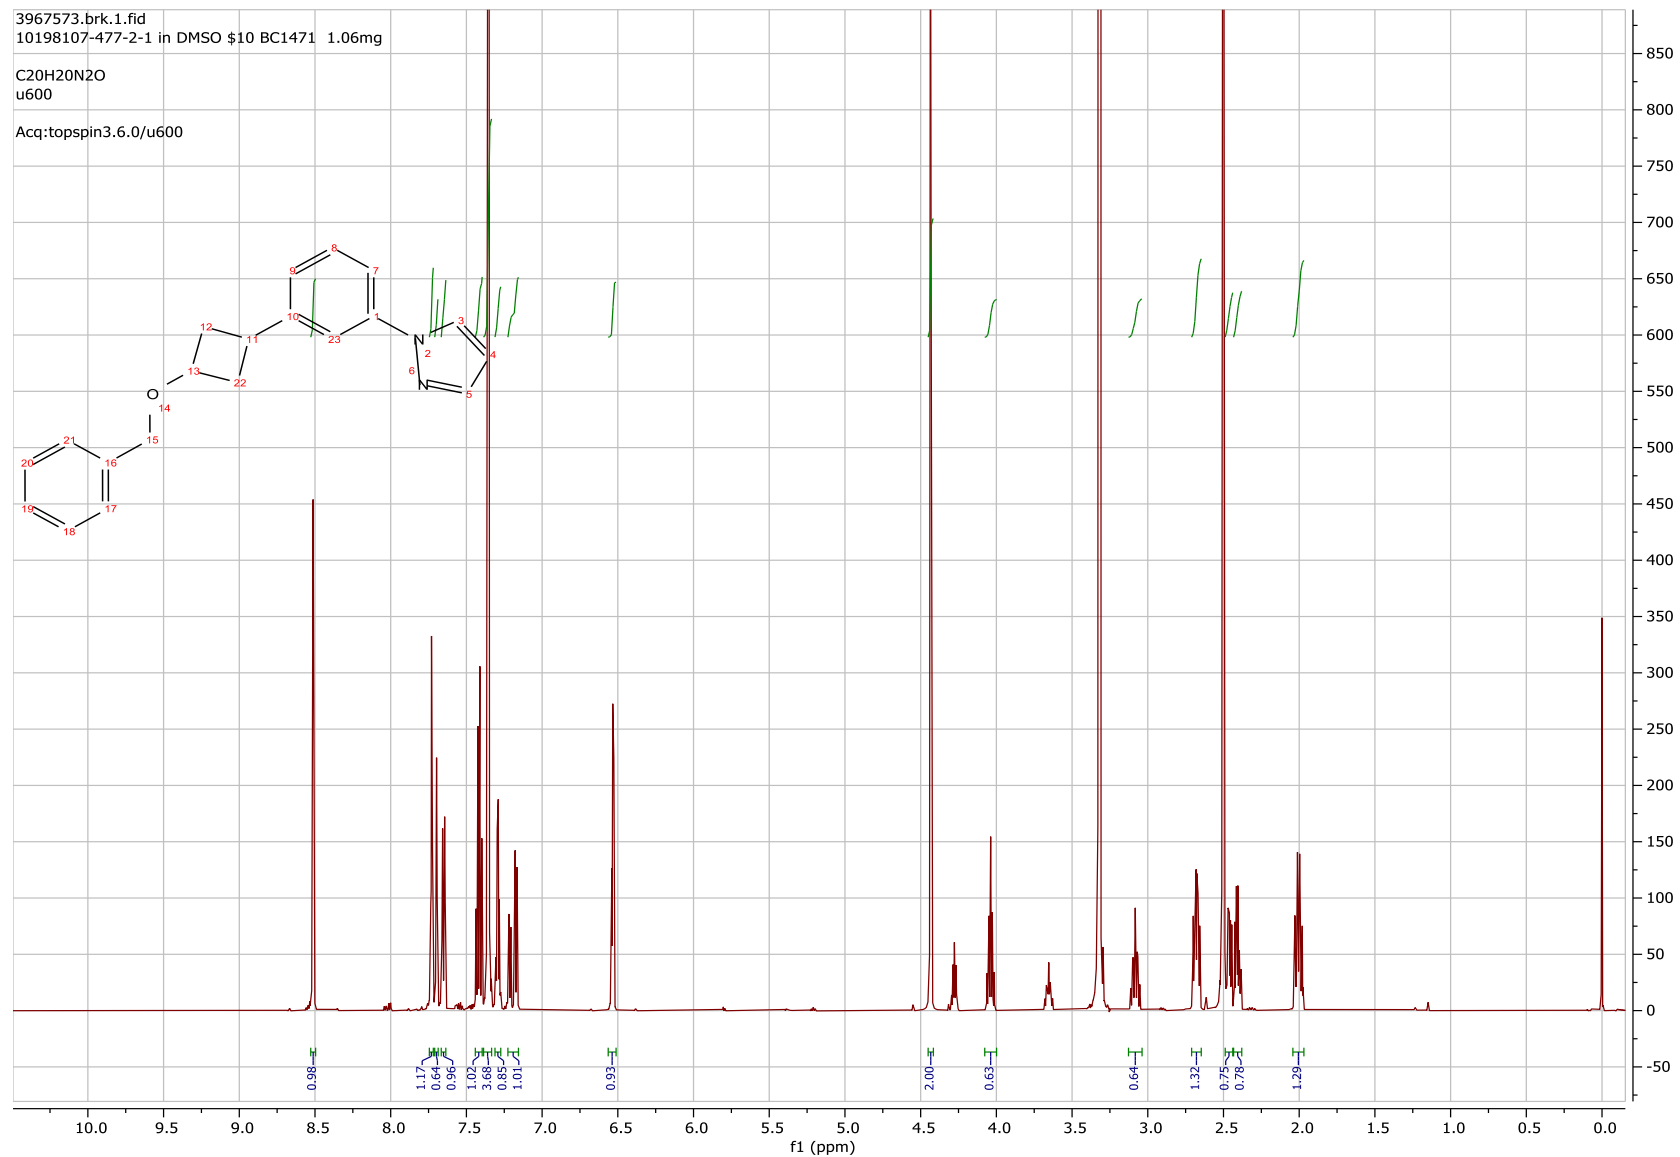

# Compound 35 <sup>13</sup>C NMR

3978391  
10198107-477-2-1 in DMSO  $\delta$ 10 BC2629 9mg  
Temp = 27 C  
C<sub>20</sub>H<sub>20</sub>N<sub>2</sub>O<sub>1</sub>  
mrs400  
Acq: VnmrJ VERSION 3.2 REVISION A/mrs400

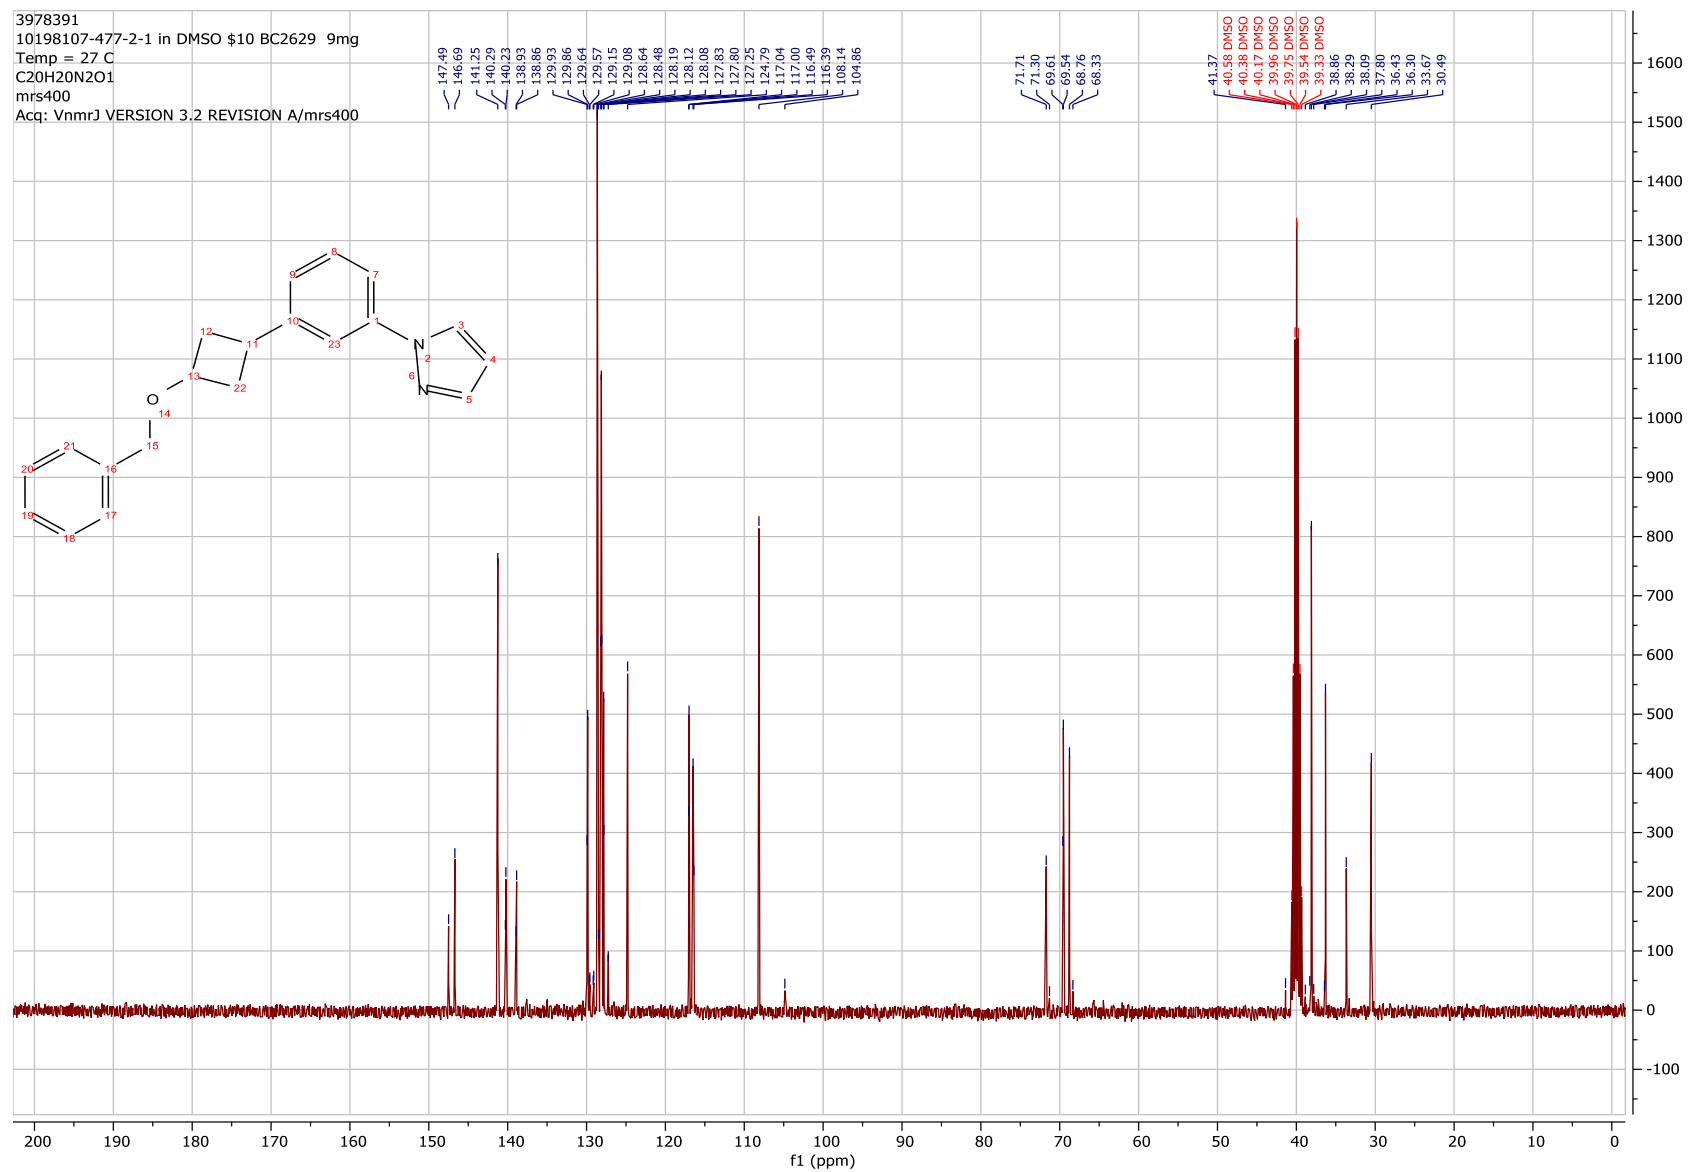

# Compound 37 <sup>1</sup>H NMR

3765039  
310198107001-2315-7-1 in DMSO  $\delta$ 17 BC9346 0.5mg  
Temp = 90 C  
C<sub>14</sub>H<sub>17</sub>N<sub>3</sub>O  
mr400  
Acq: VnmrJ VERSION 3.2 REVISION A/mr400

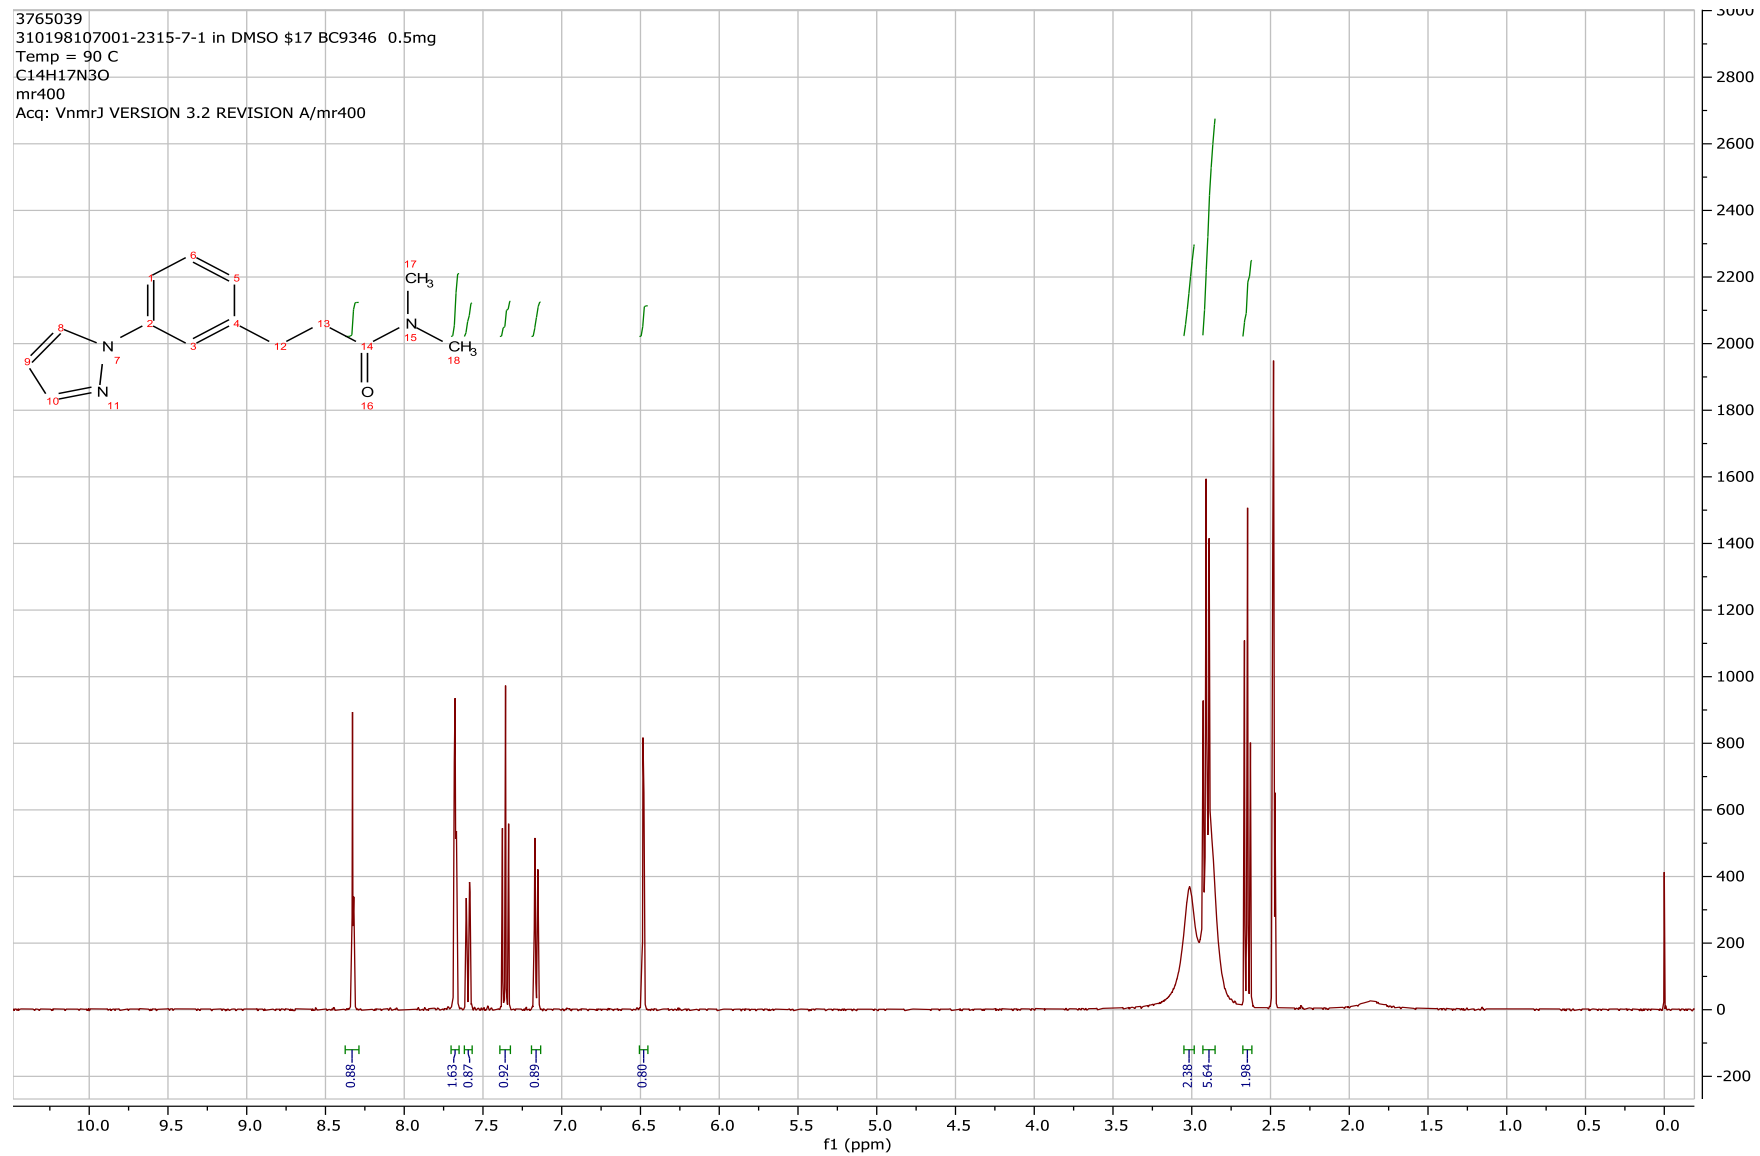

# Compound 37 <sup>13</sup>C NMR

3977944.brk.1.fid  
310198107001-2315-7-1 in DMSO \$19 BC2630 9mg

C14H17N3O  
s400

Acq:topspin3.6.1/s400

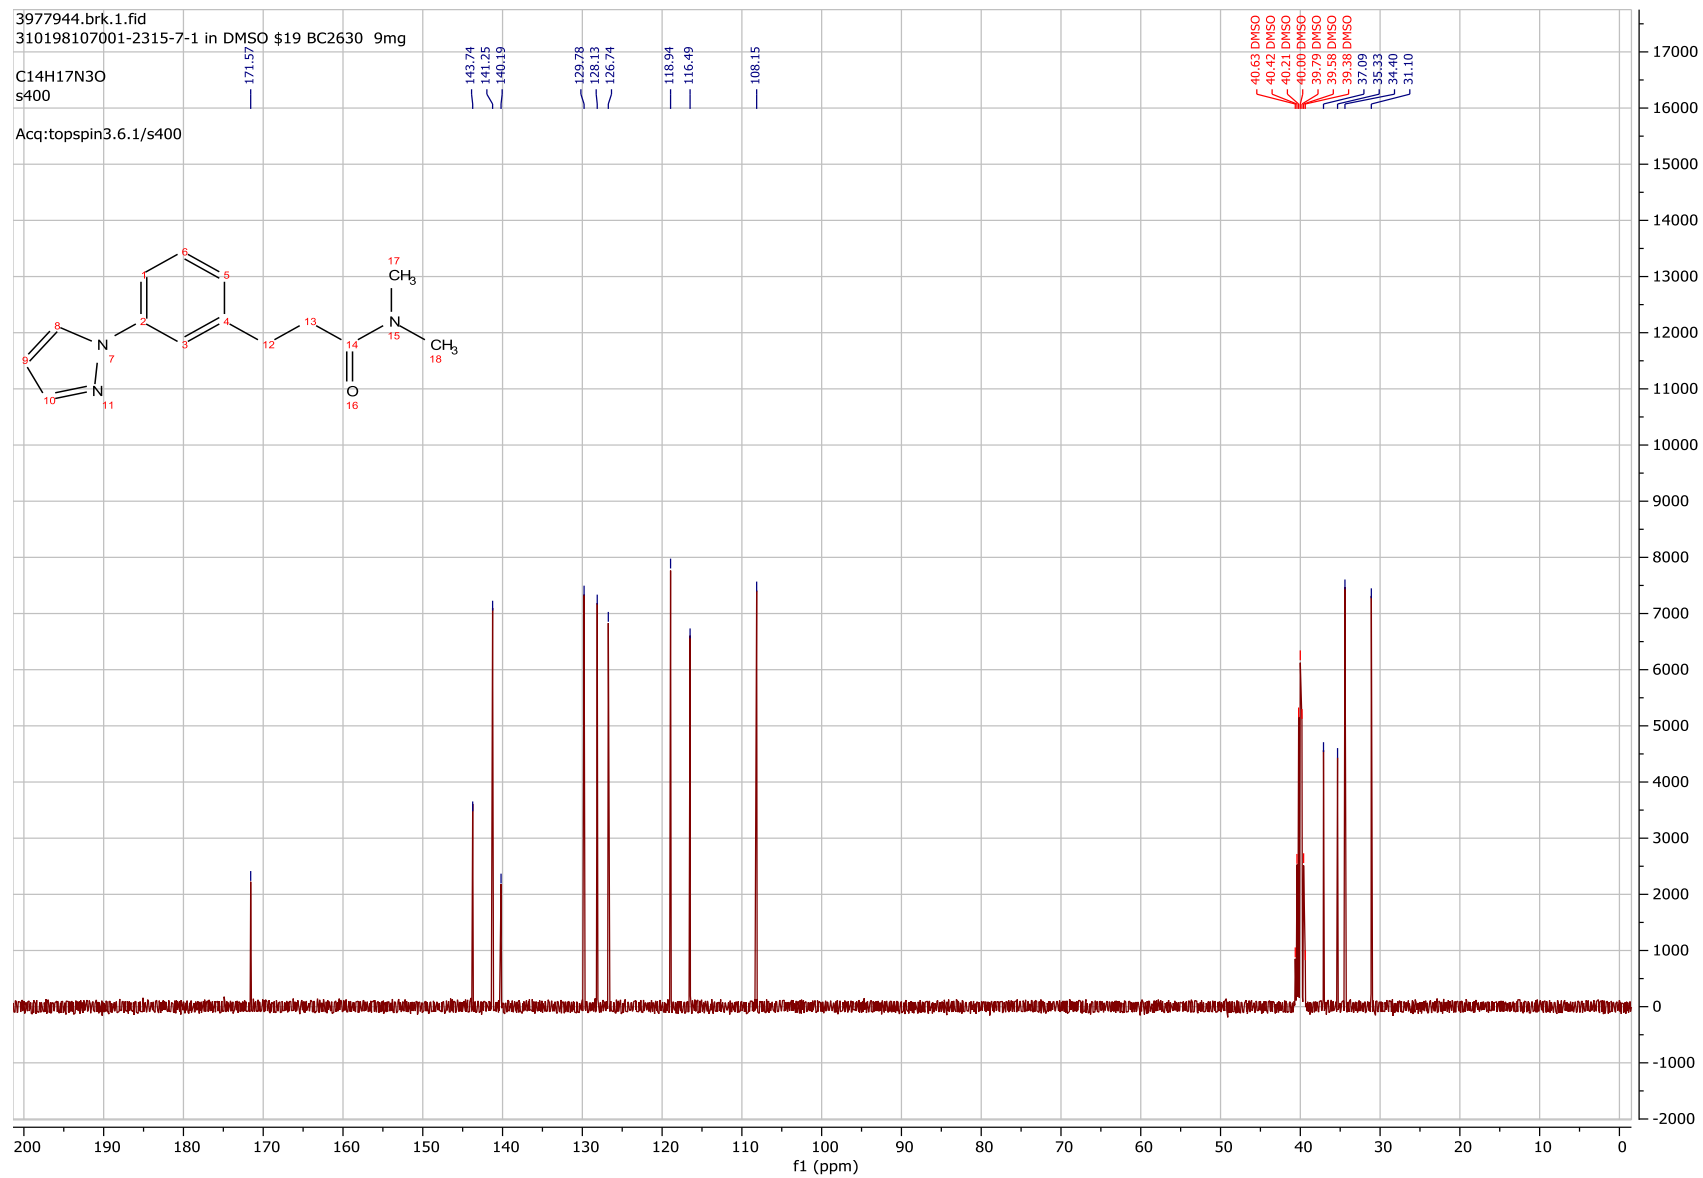



# Compound 40 <sup>1</sup>H NMR

3959878.brk.1.fid  
310198107001-2378-3-2 in DMSO  $\phi$ 29 BC8146 0.5mg

C15H22N2  
s400

Acq:topspin3.6.1/s400

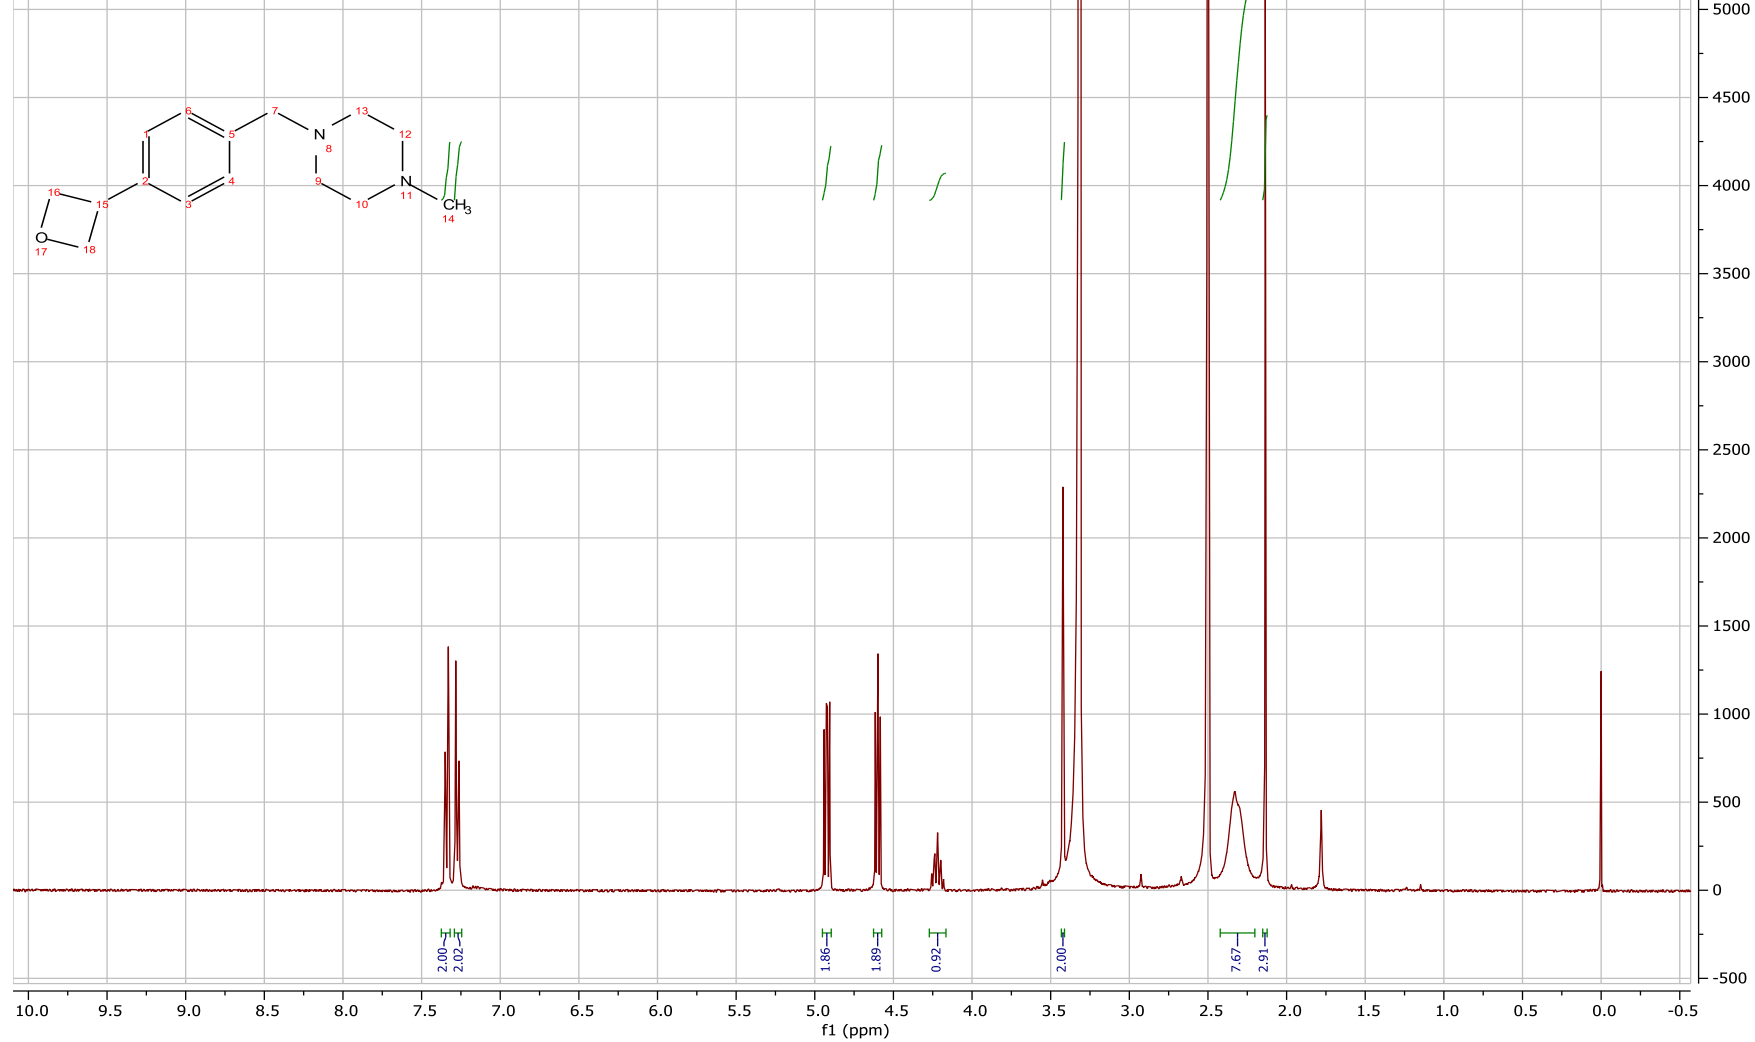

# Compound 40 <sup>13</sup>C NMR

3979723  
310198107001-2378-3-2 in DMSO \$29 BC2644 7.93mg  
Temp = 27 C  
C15H22N2O  
mrs400  
Acq: VnmrJ VERSION 3.2 REVISION A/mrs400

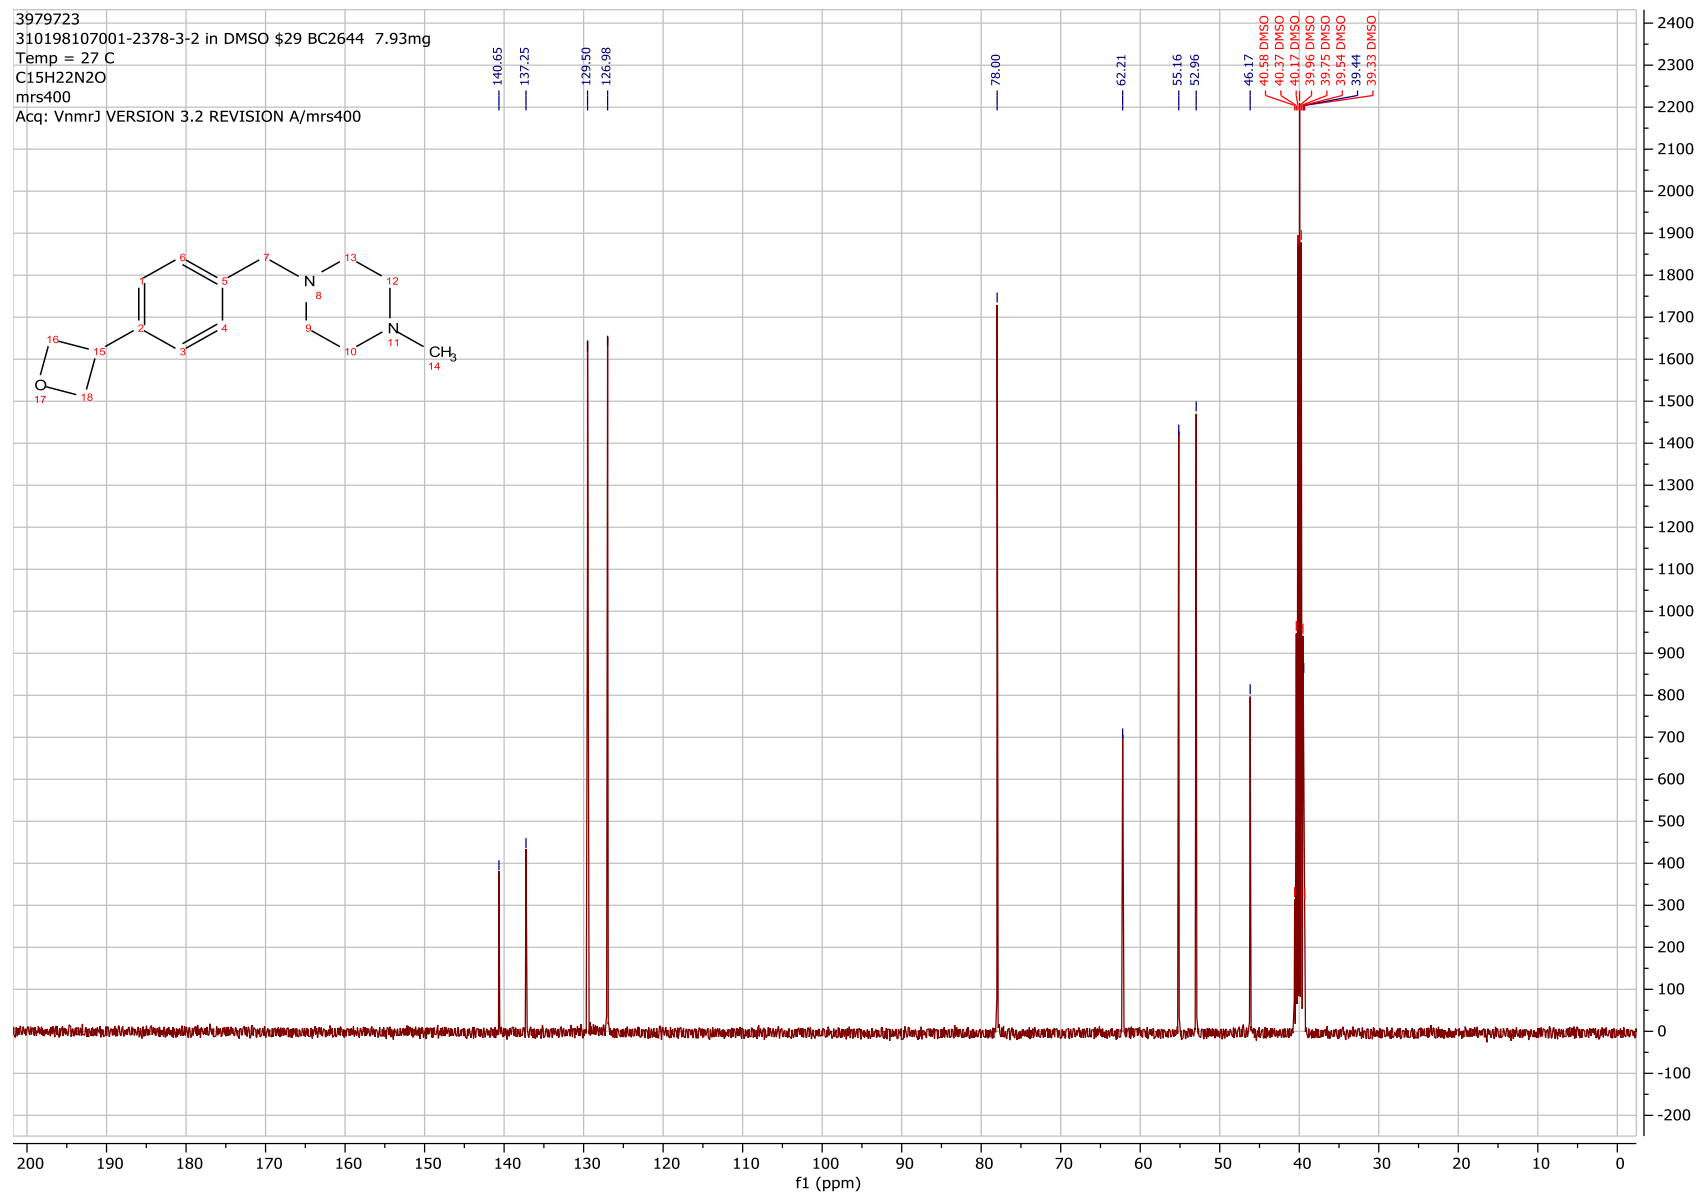

# Compound 54 <sup>1</sup>HNMR

3883571.brk.1.fid  
310198107001-2322-1-1 in PYRIDINE \$18 BC9166 0.5mg

C17H26N  
av499

Acq:topspin3.6.1/av499

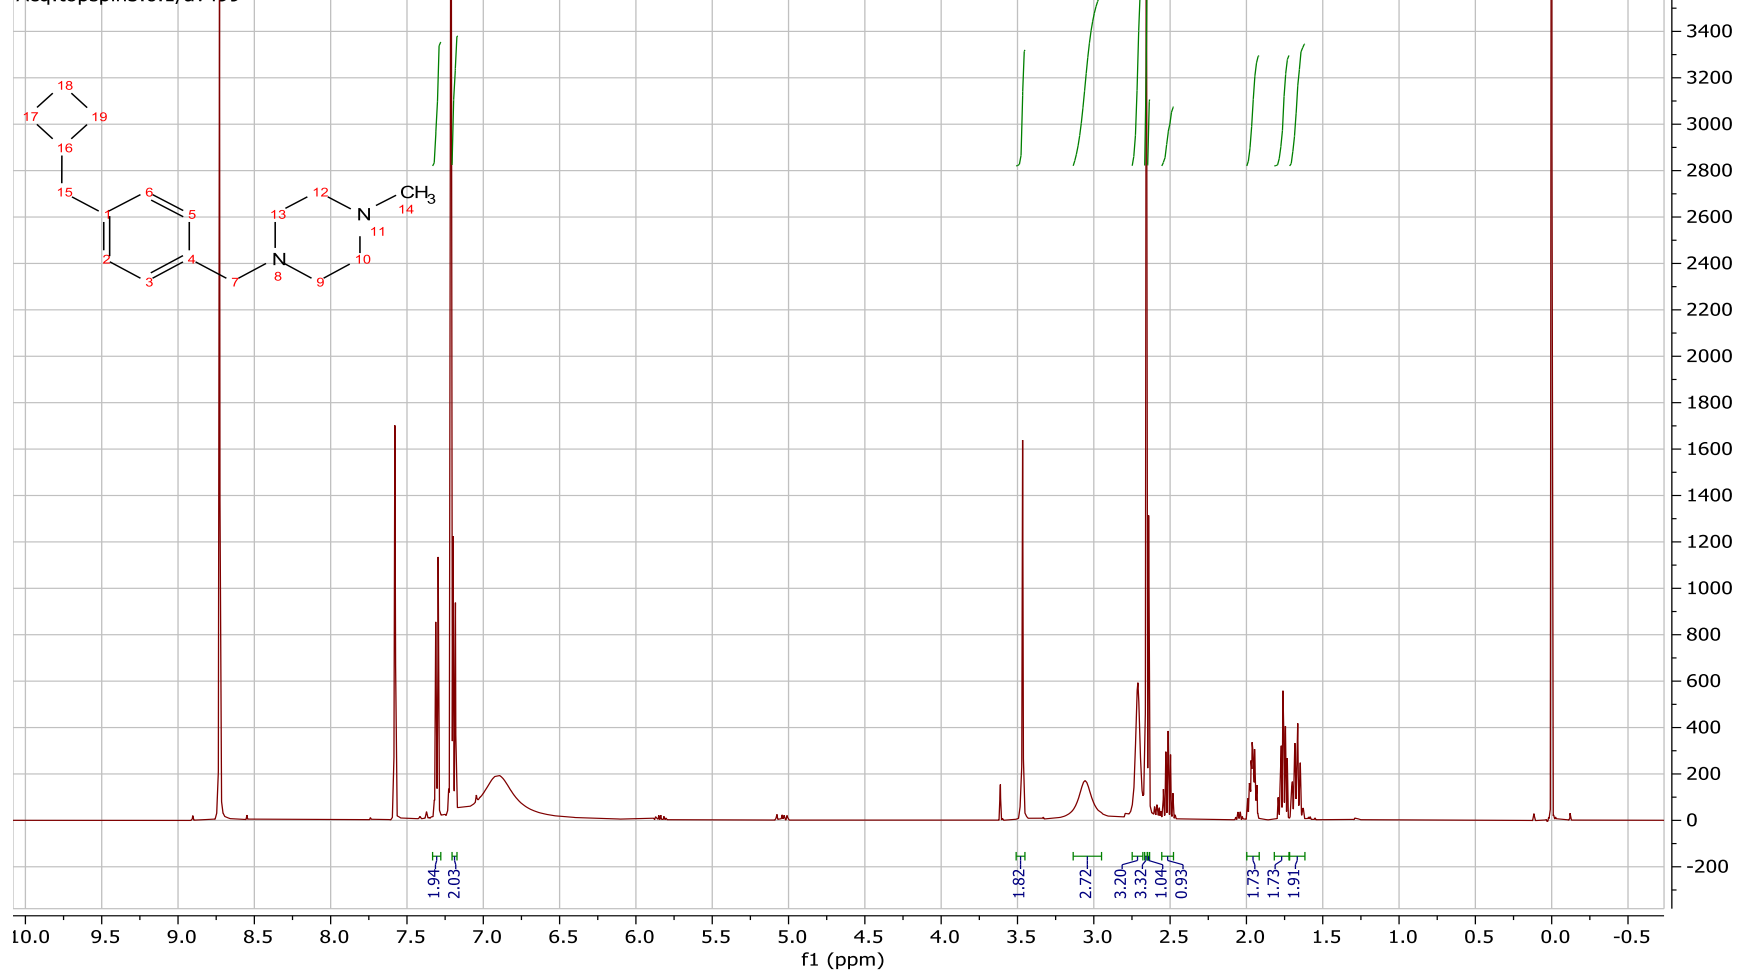

# Compound 54 <sup>13</sup>C NMR

3977634.brk.1.fid  
10198107-483-1-1 in DMSO \$18 BC2634 7.11mg

C17H26N  
s400

Acq:topspin3.6.1/s400

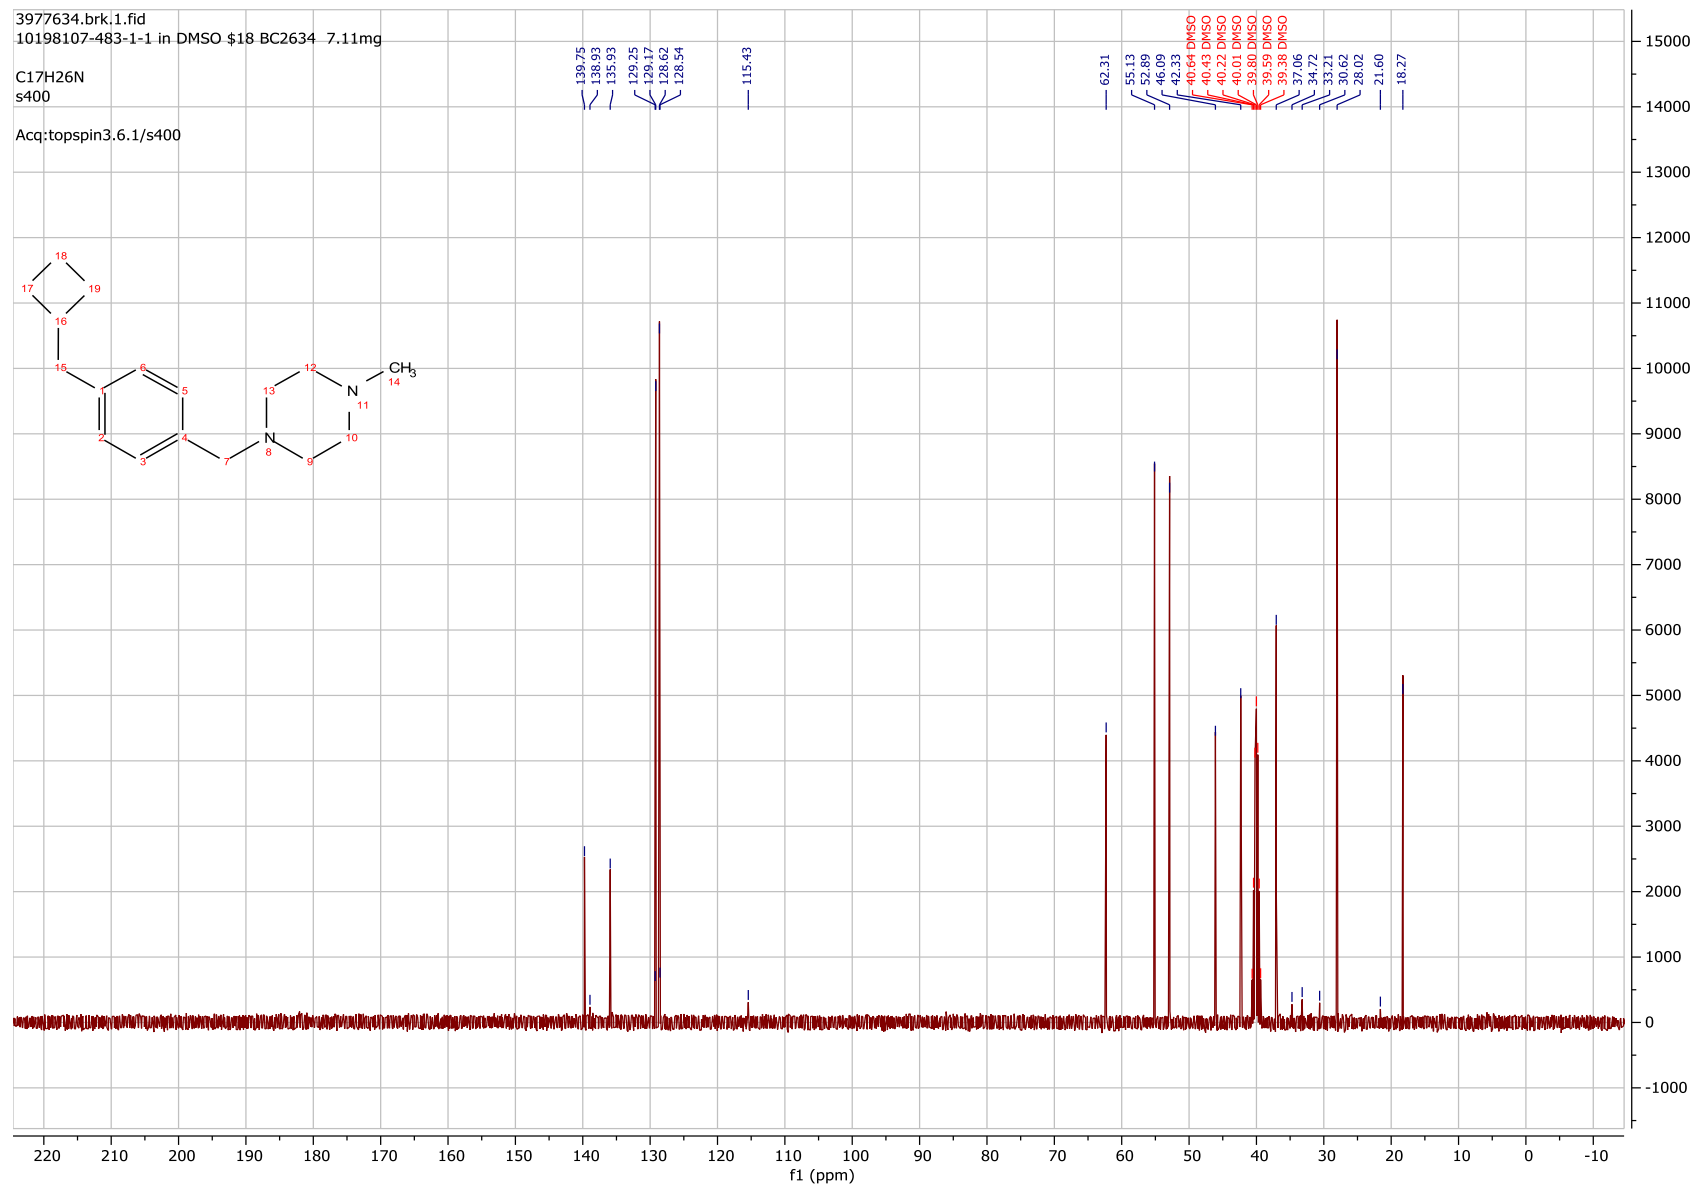

# Compound 57 <sup>1</sup>H NMR

3883575.brk.1.fid  
310198107001-2322-3-1 in PYRIDINE \$18 BC9169 0.5mg

C15H24N2  
av499

Acq:topspin3.6.1/av499

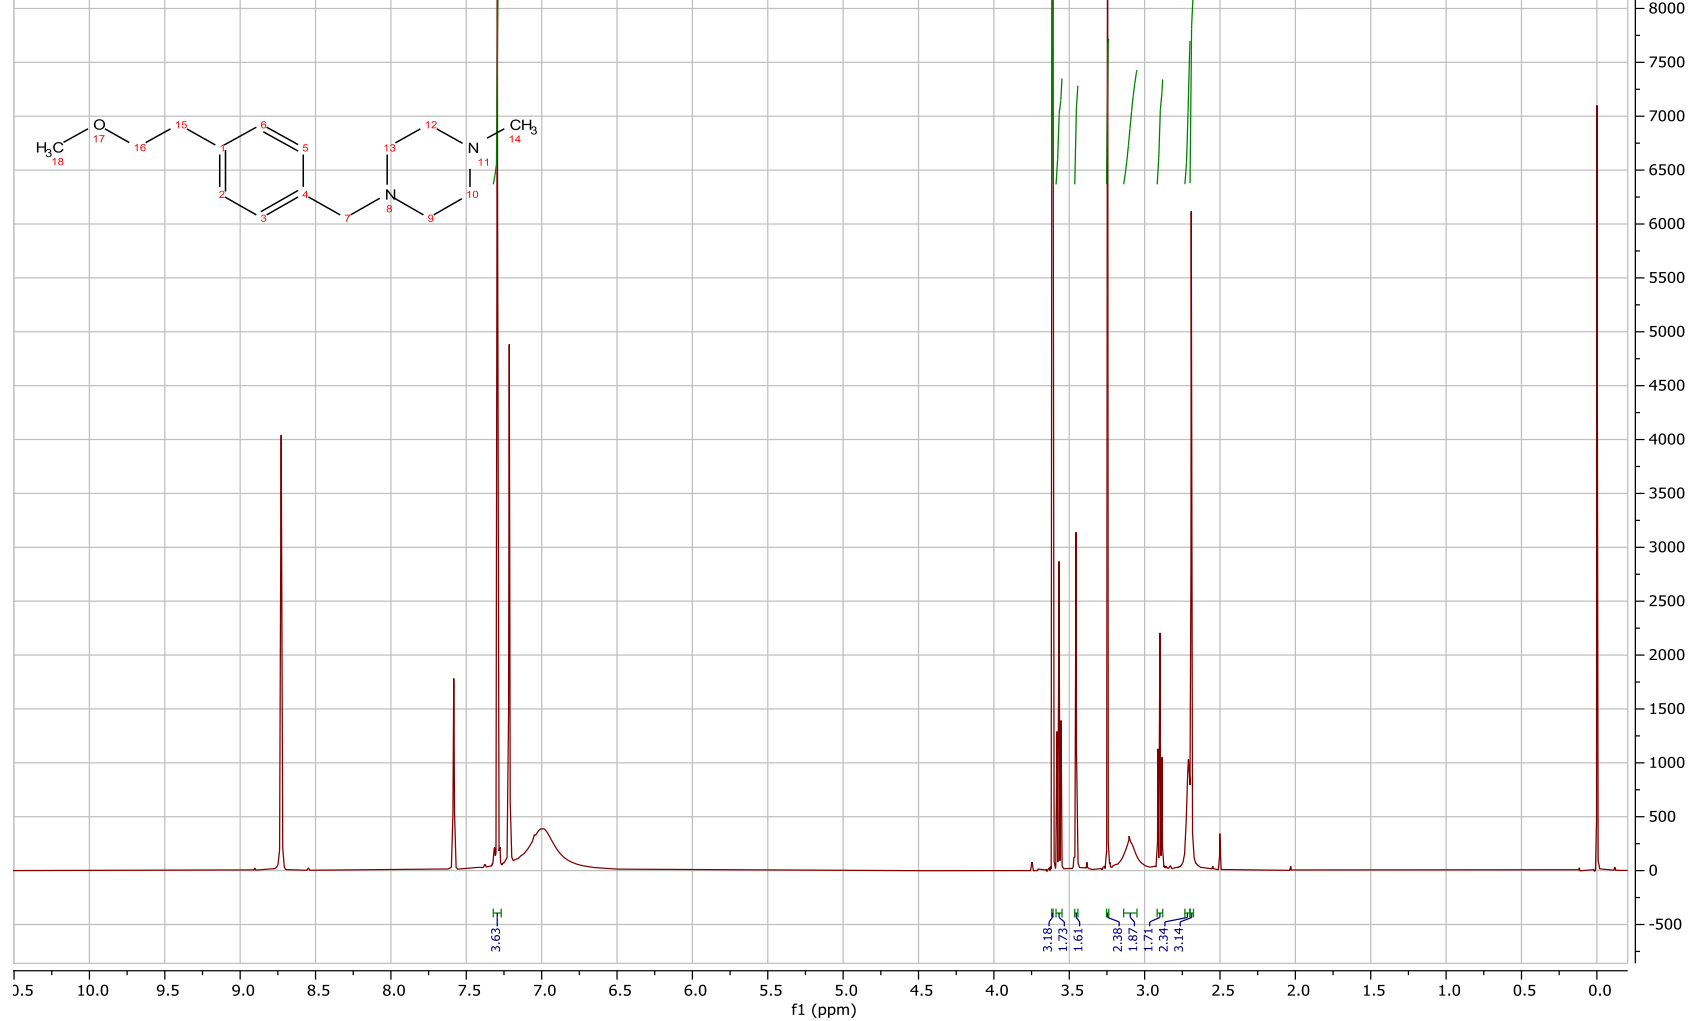

# Compound 57 <sup>13</sup>C NMR

3978614  
310198107001-2322-3-1 in DMSO \$19 BC2632 9.0mg  
Temp = 27 C  
C15H24N2O1  
mrs400  
Acq: VnmrJ VERSION 3.2 REVISION A/mrs400

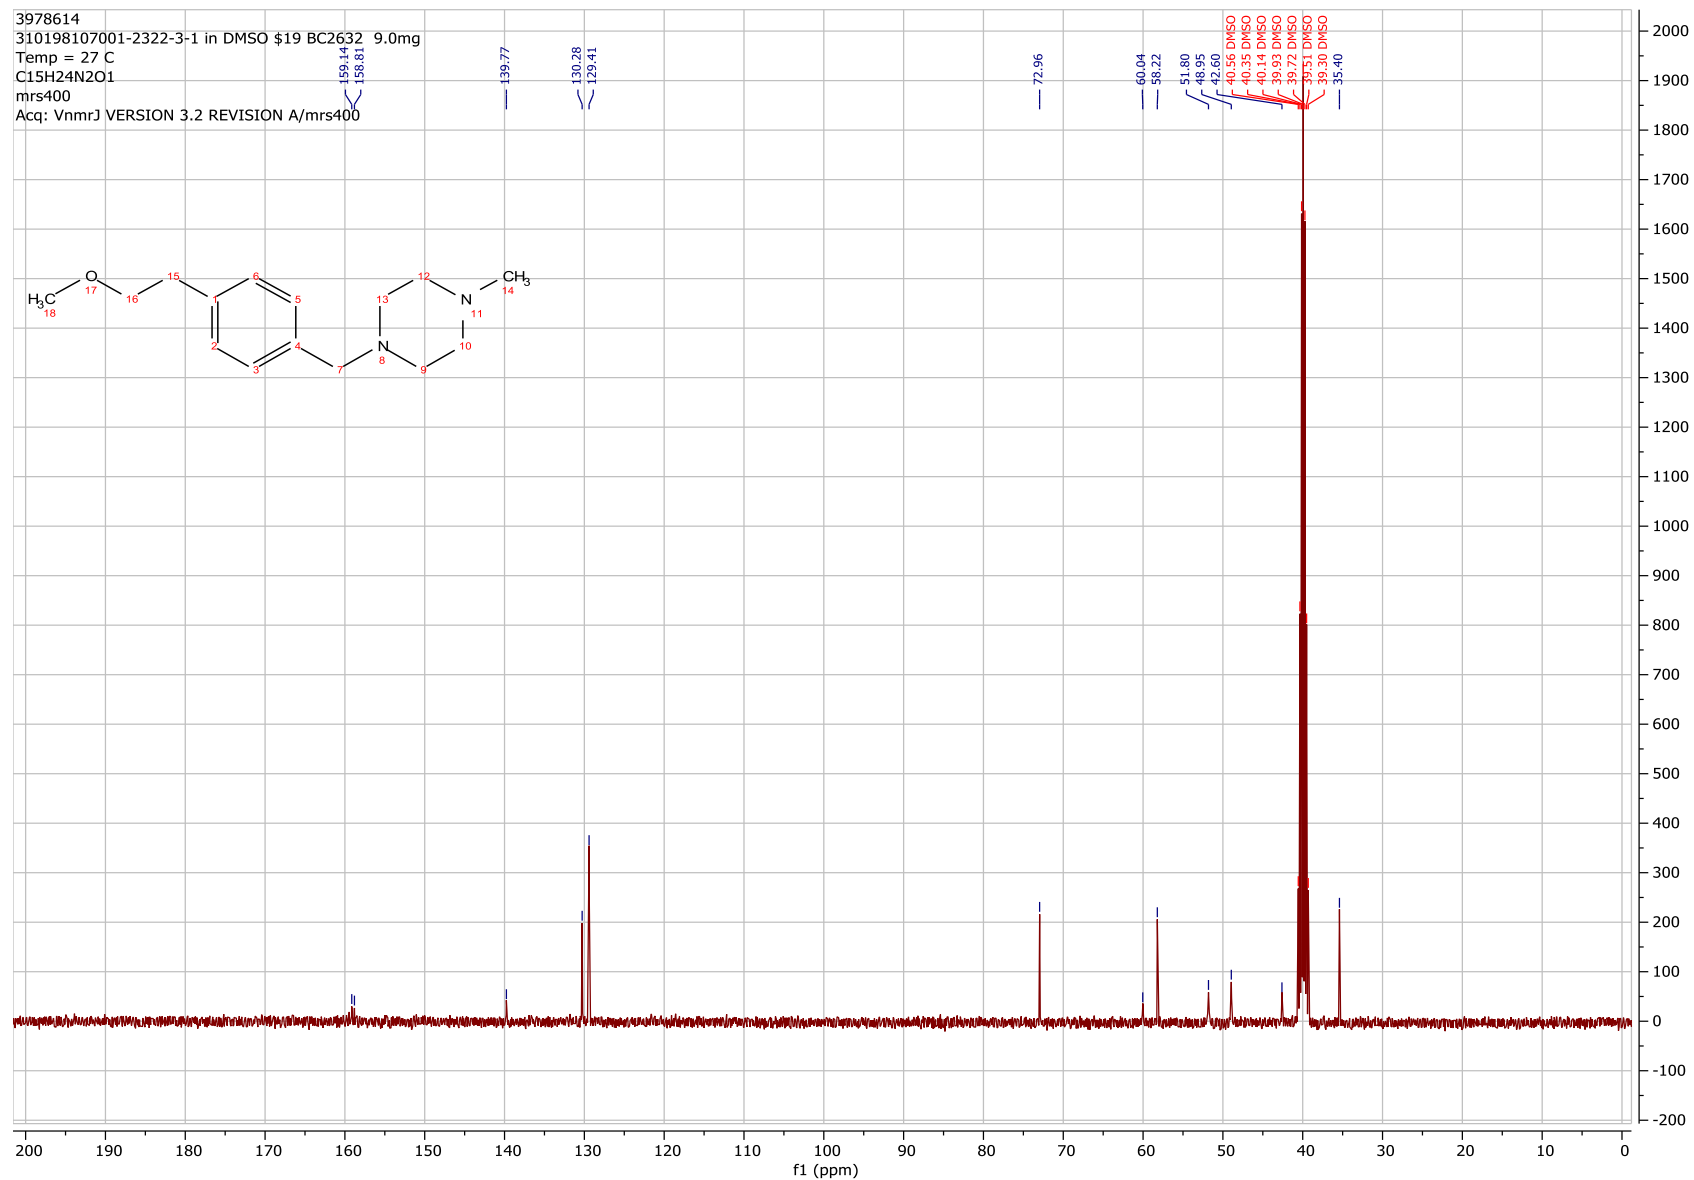

# Compound 58 <sup>1</sup>H NMR

3985167  
310198107001-2406-2-1 in DMSO  $\phi$ 02 BC8912 0.5mg  
Temp = 27 C  
C<sub>16</sub>H<sub>24</sub>N<sub>2</sub>O  
mrs400  
Acq: VnmrJ VERSION 3.2 REVISION A/mrs400

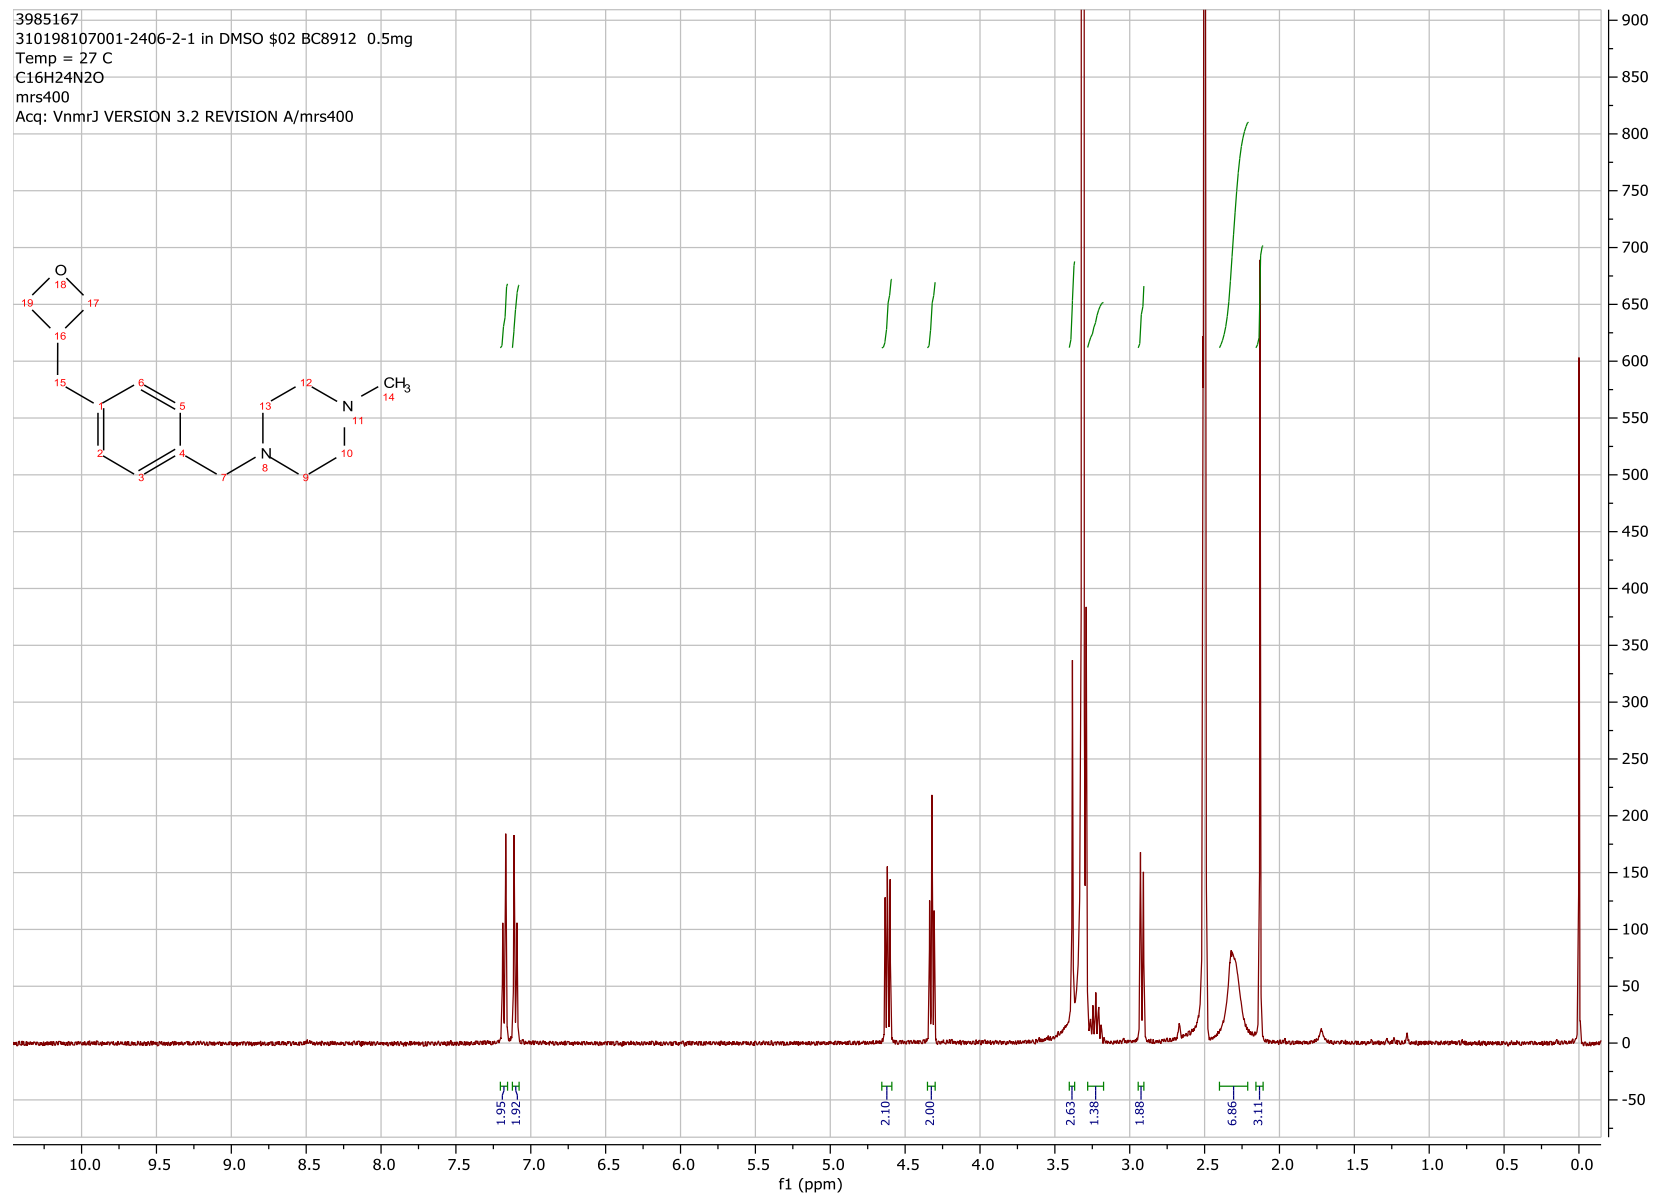

# Compound 58 <sup>13</sup>C NMR

3994372.brk.1.fid  
310198107001-2406-2-1 in DMSO  $\phi$ 02 BC2657 5mg

C16H24N2  
s400

Acq:topspin3.6.1/s400

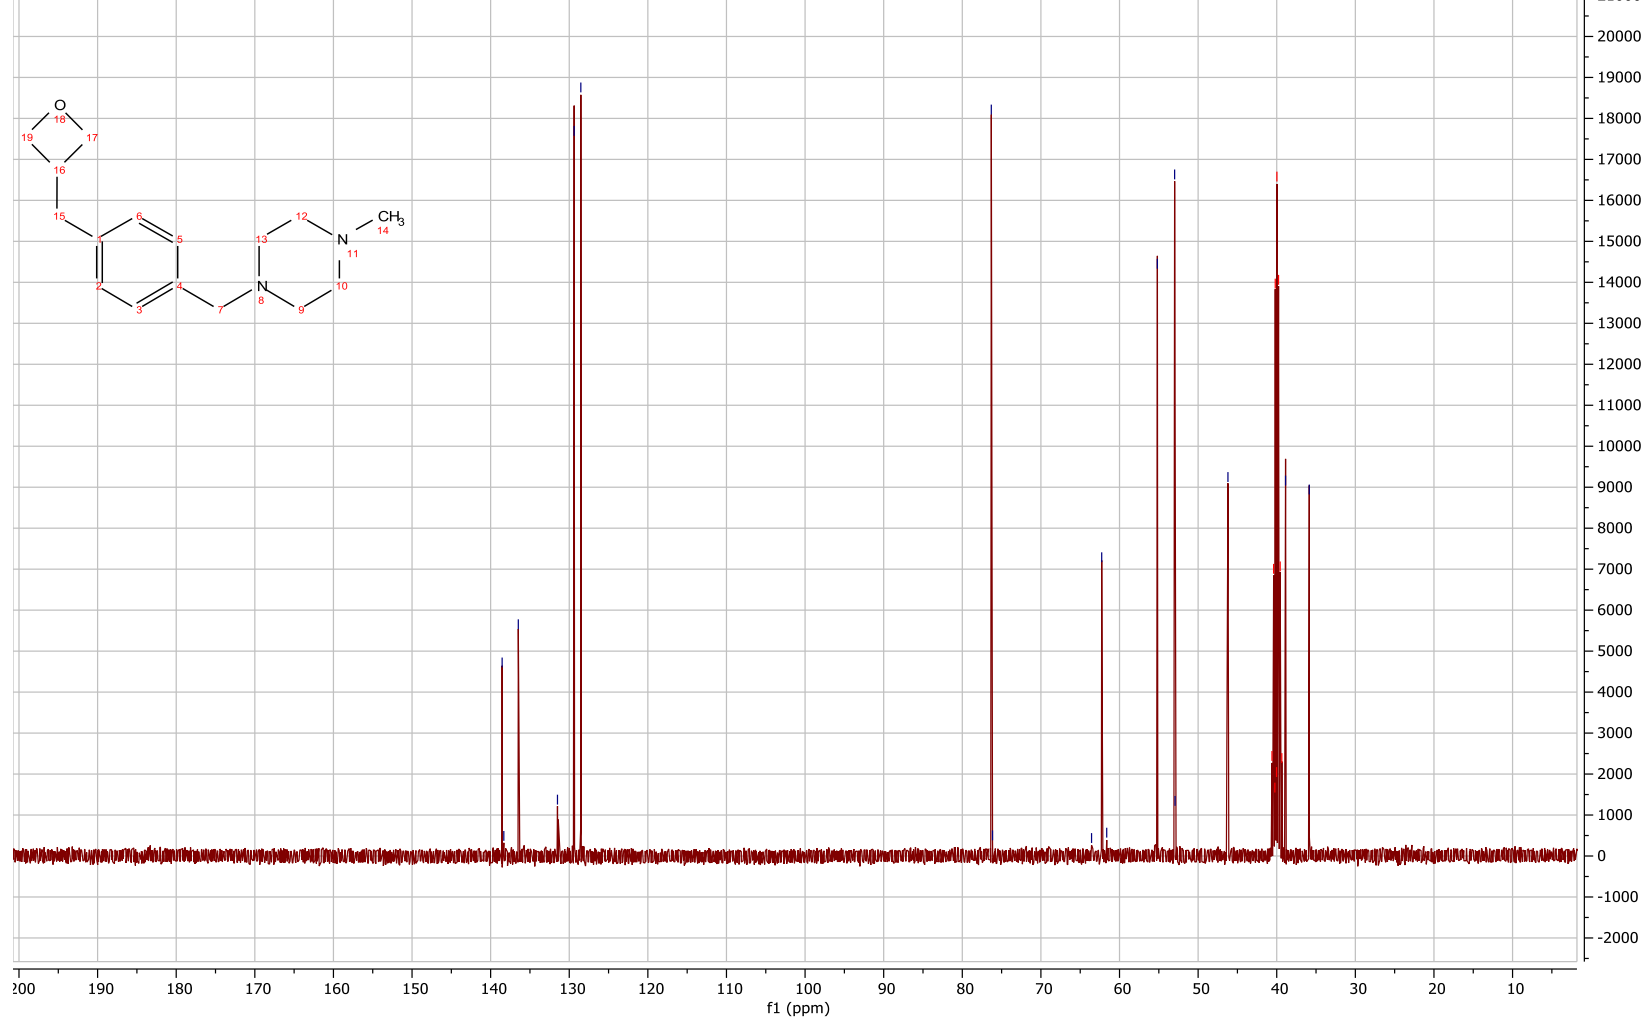



# Compound 59 <sup>1</sup>H NMR

3883582.brk.1.fid  
310198107001-2322-5-1 in PYRIDINE \$18 BC9172 0.5mg

C17H24F2N  
av499

Acq:topspin3.6.1/av499

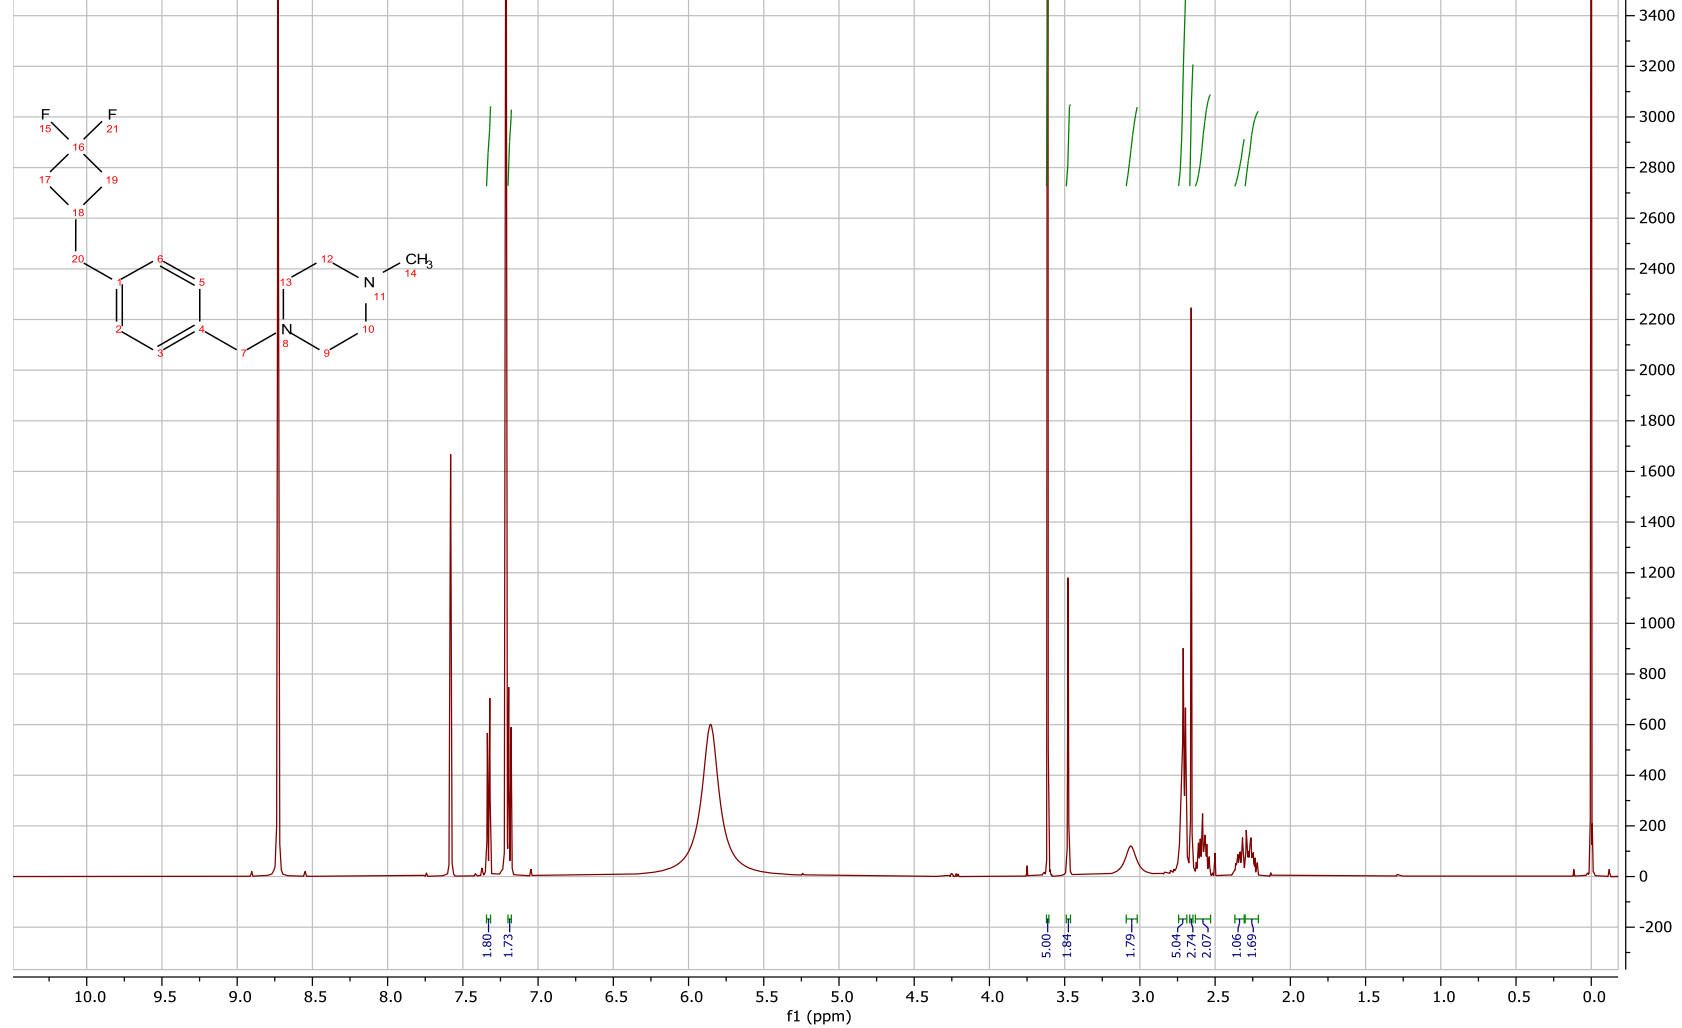

# Compound 59 <sup>13</sup>C NMR

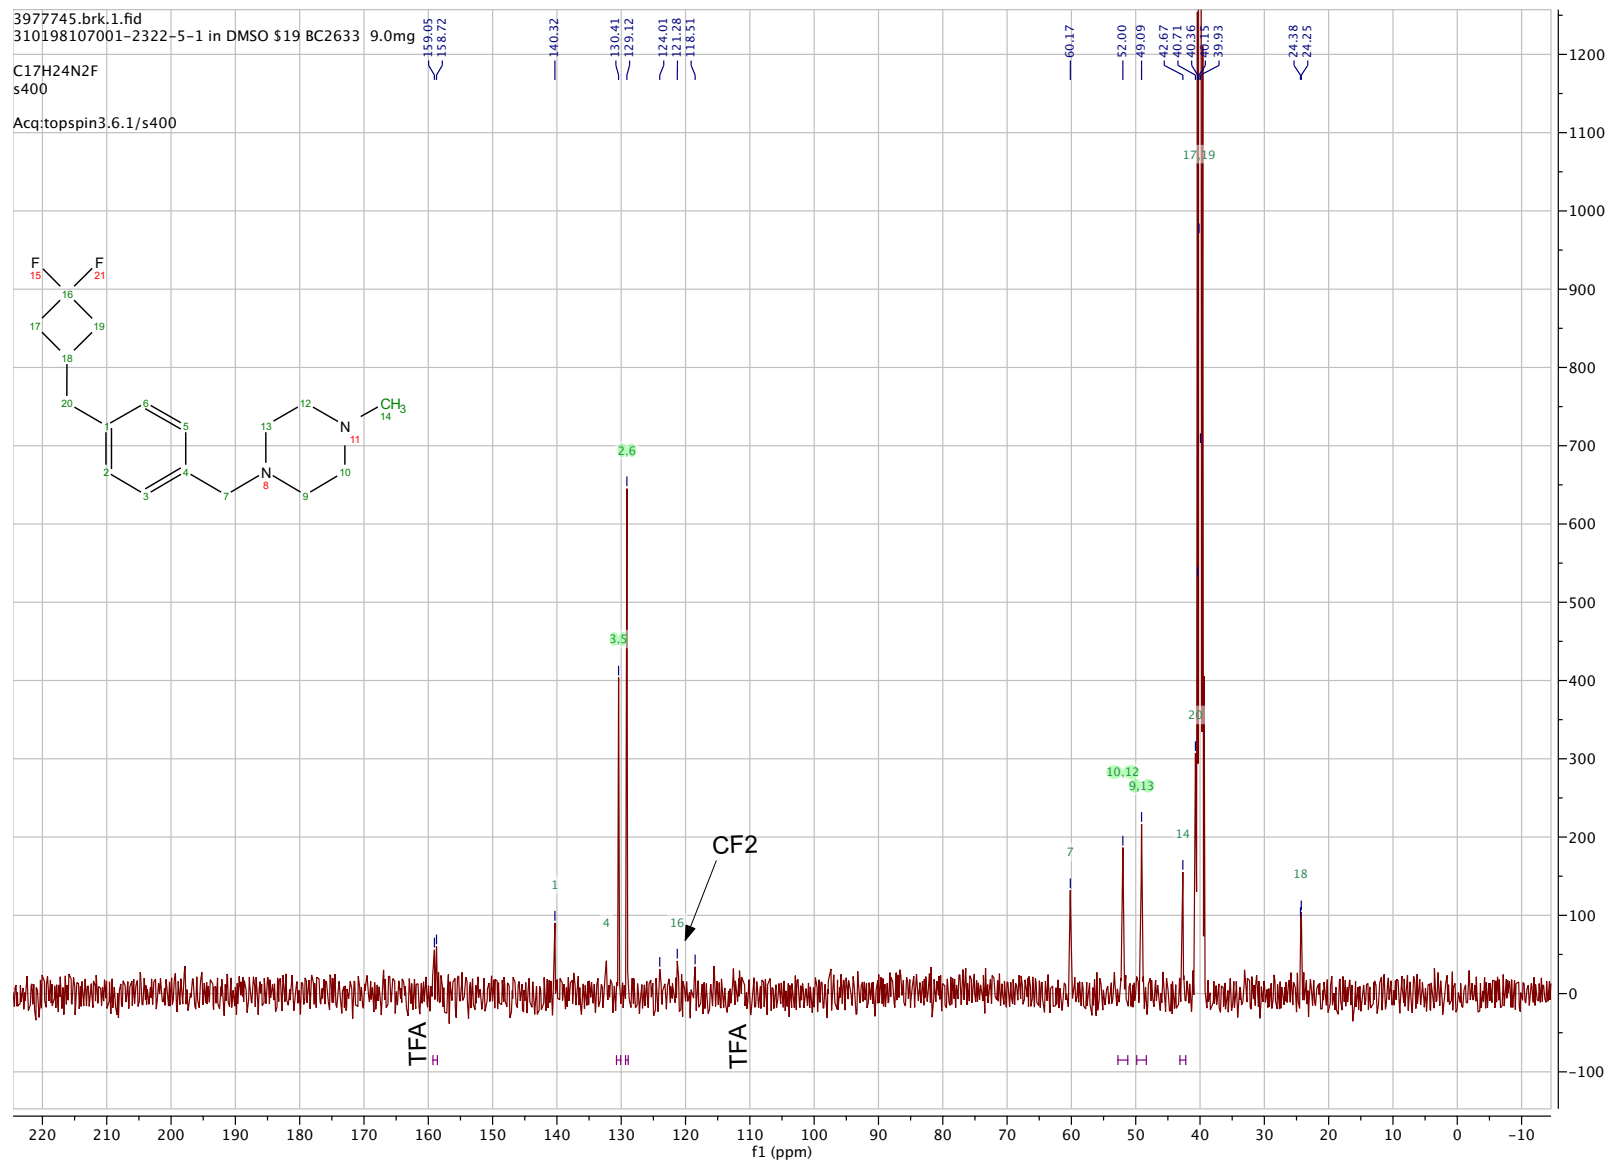

# Compound 60 <sup>1</sup>H NMR

3972443.brk.1.fid  
310198107001-2397-1-1 in DMSO  $\phi$ 16 BC8507 0.5mg

C17H26N2  
av500

Acq:topspin3.5pl7/av500

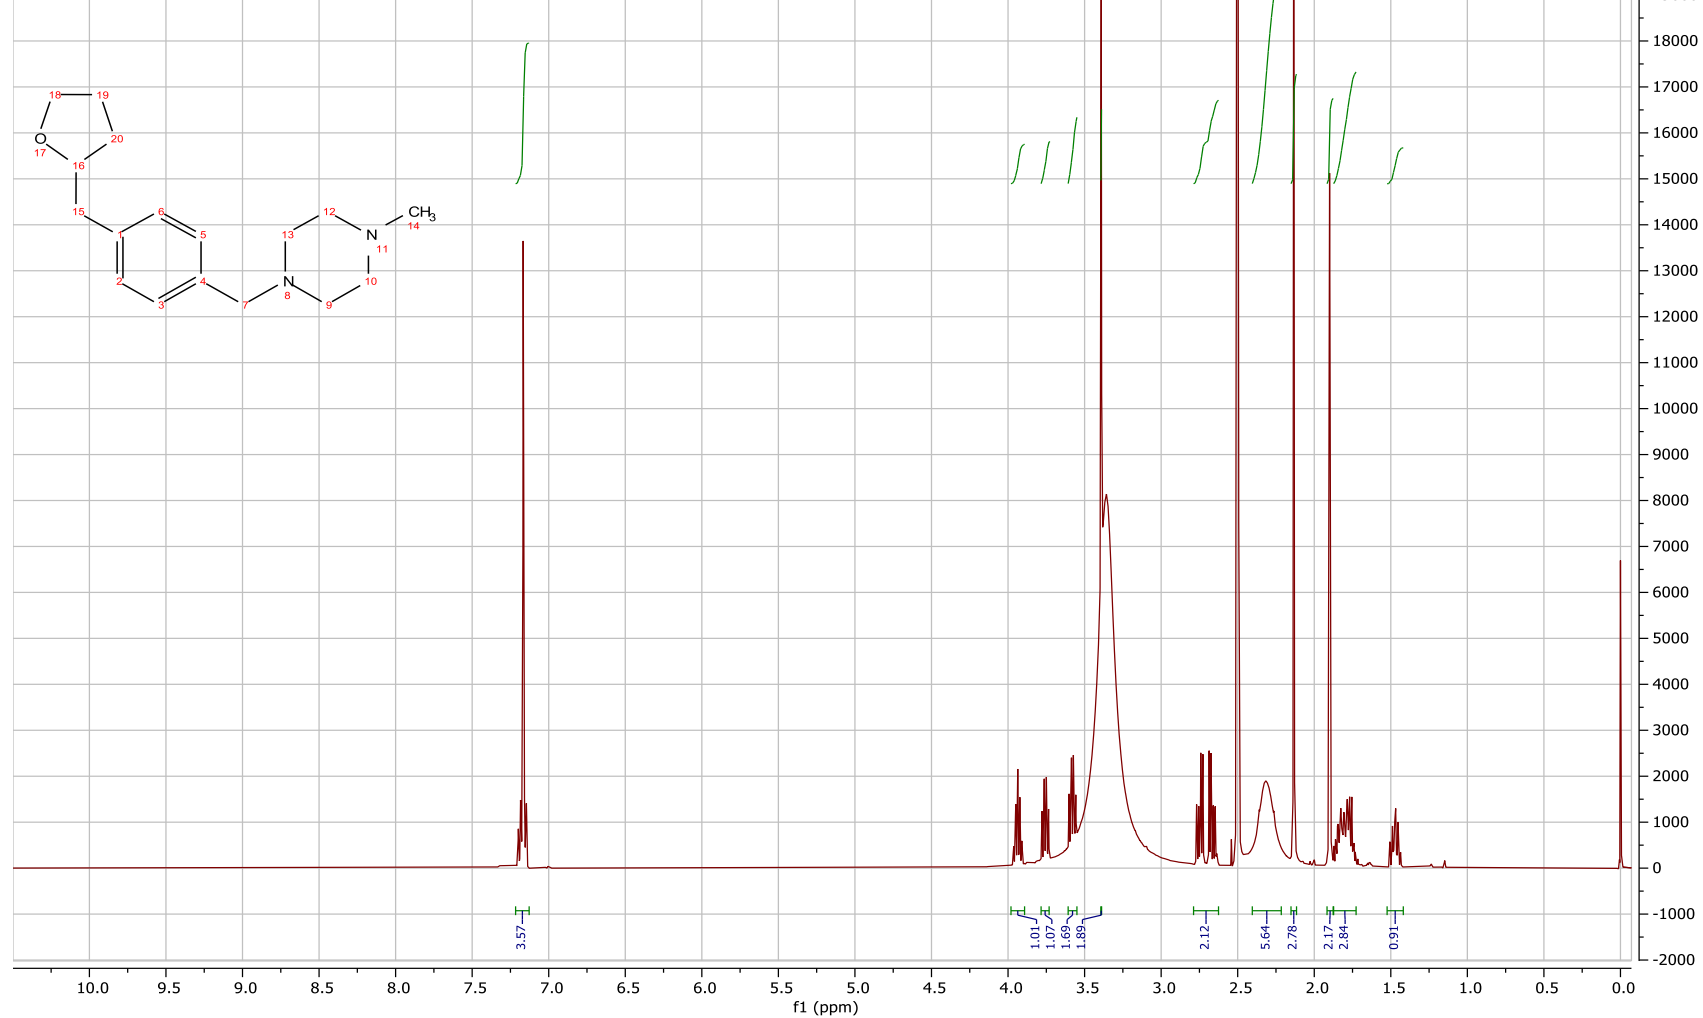

# Compound 60 <sup>13</sup>C NMR

3978508  
310198107001-2397-1-1 in DMSO \$16 BC2631 9.6mg  
Temp = 27 C  
C17H26N2O  
mrs400  
Acq: VnmrJ VERSION 3.2 REVISION A/mrs400

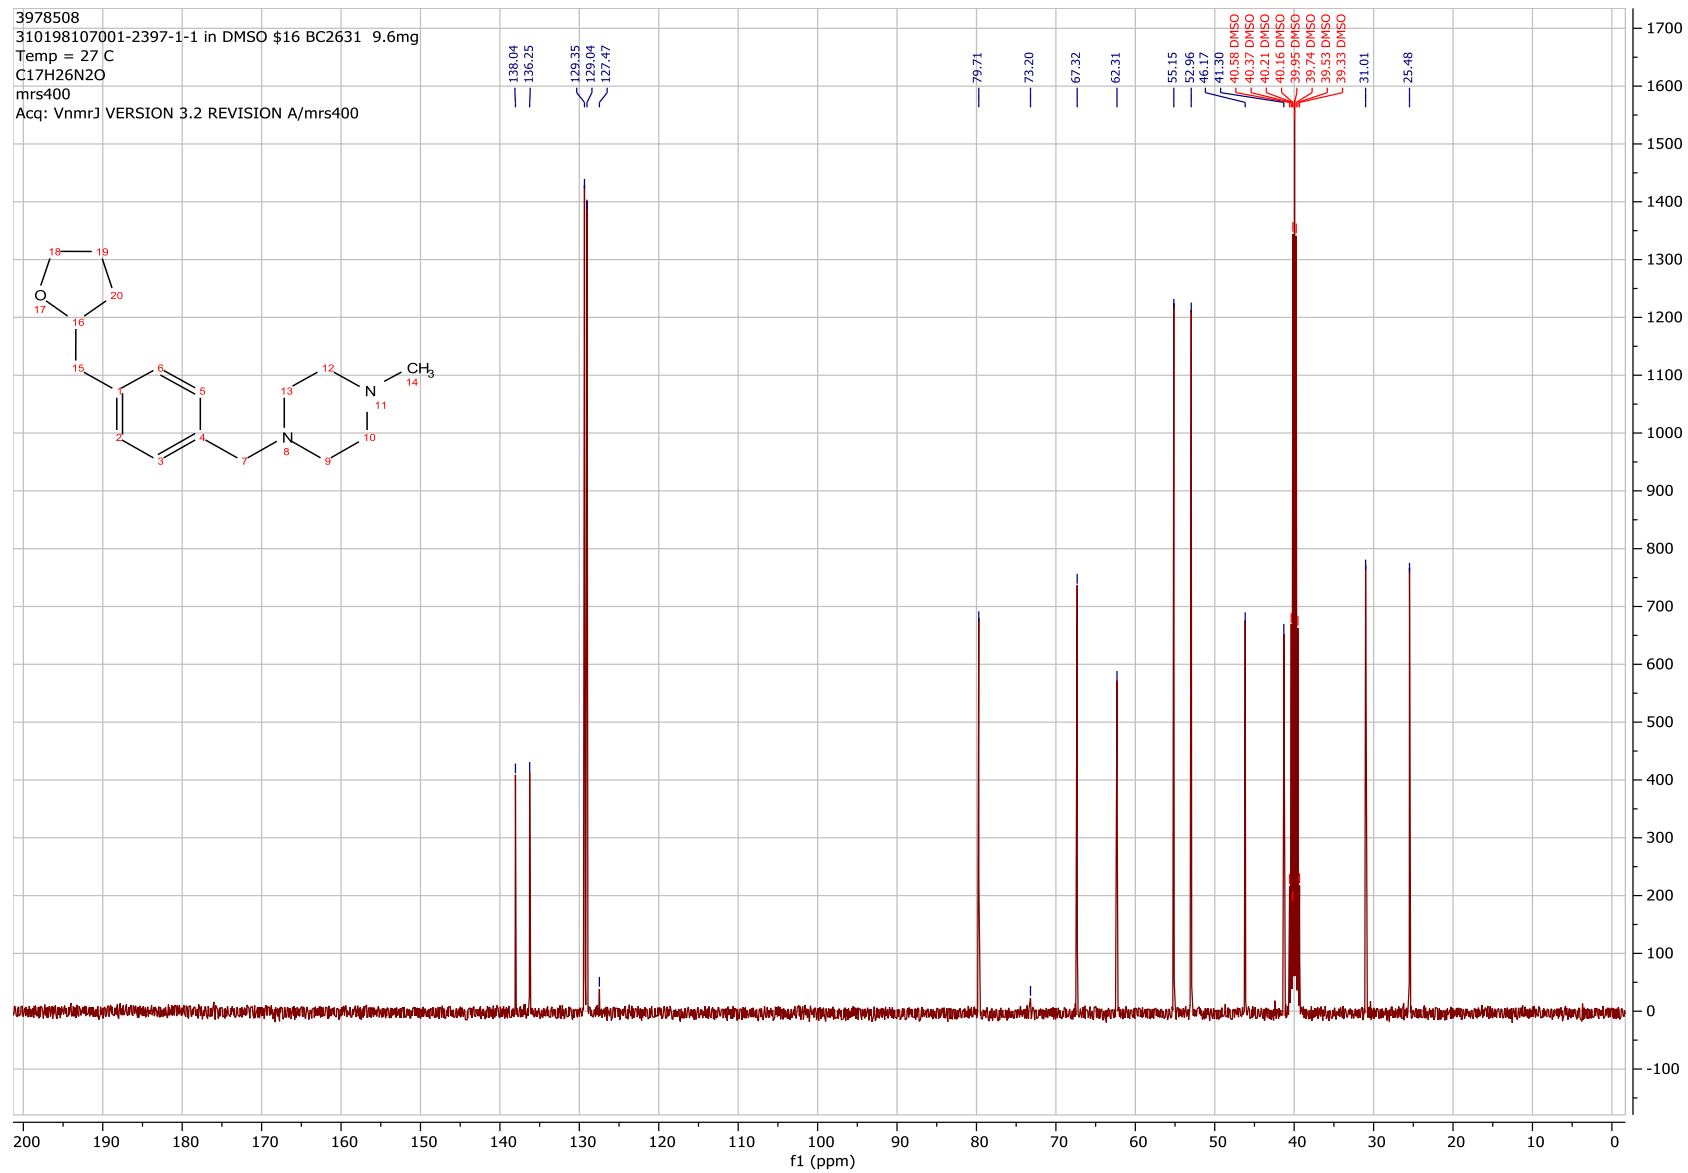

# Compound 94 <sup>1</sup>HNMR

3764985  
310198107001-2317-2-1 in DMSO  $\delta$ 17 BC9376 0.5mg  
Temp = 90 C  
C11H12N2O  
mr400  
Acq: VnmrJ VERSION 3.2 REVISION A/mr400

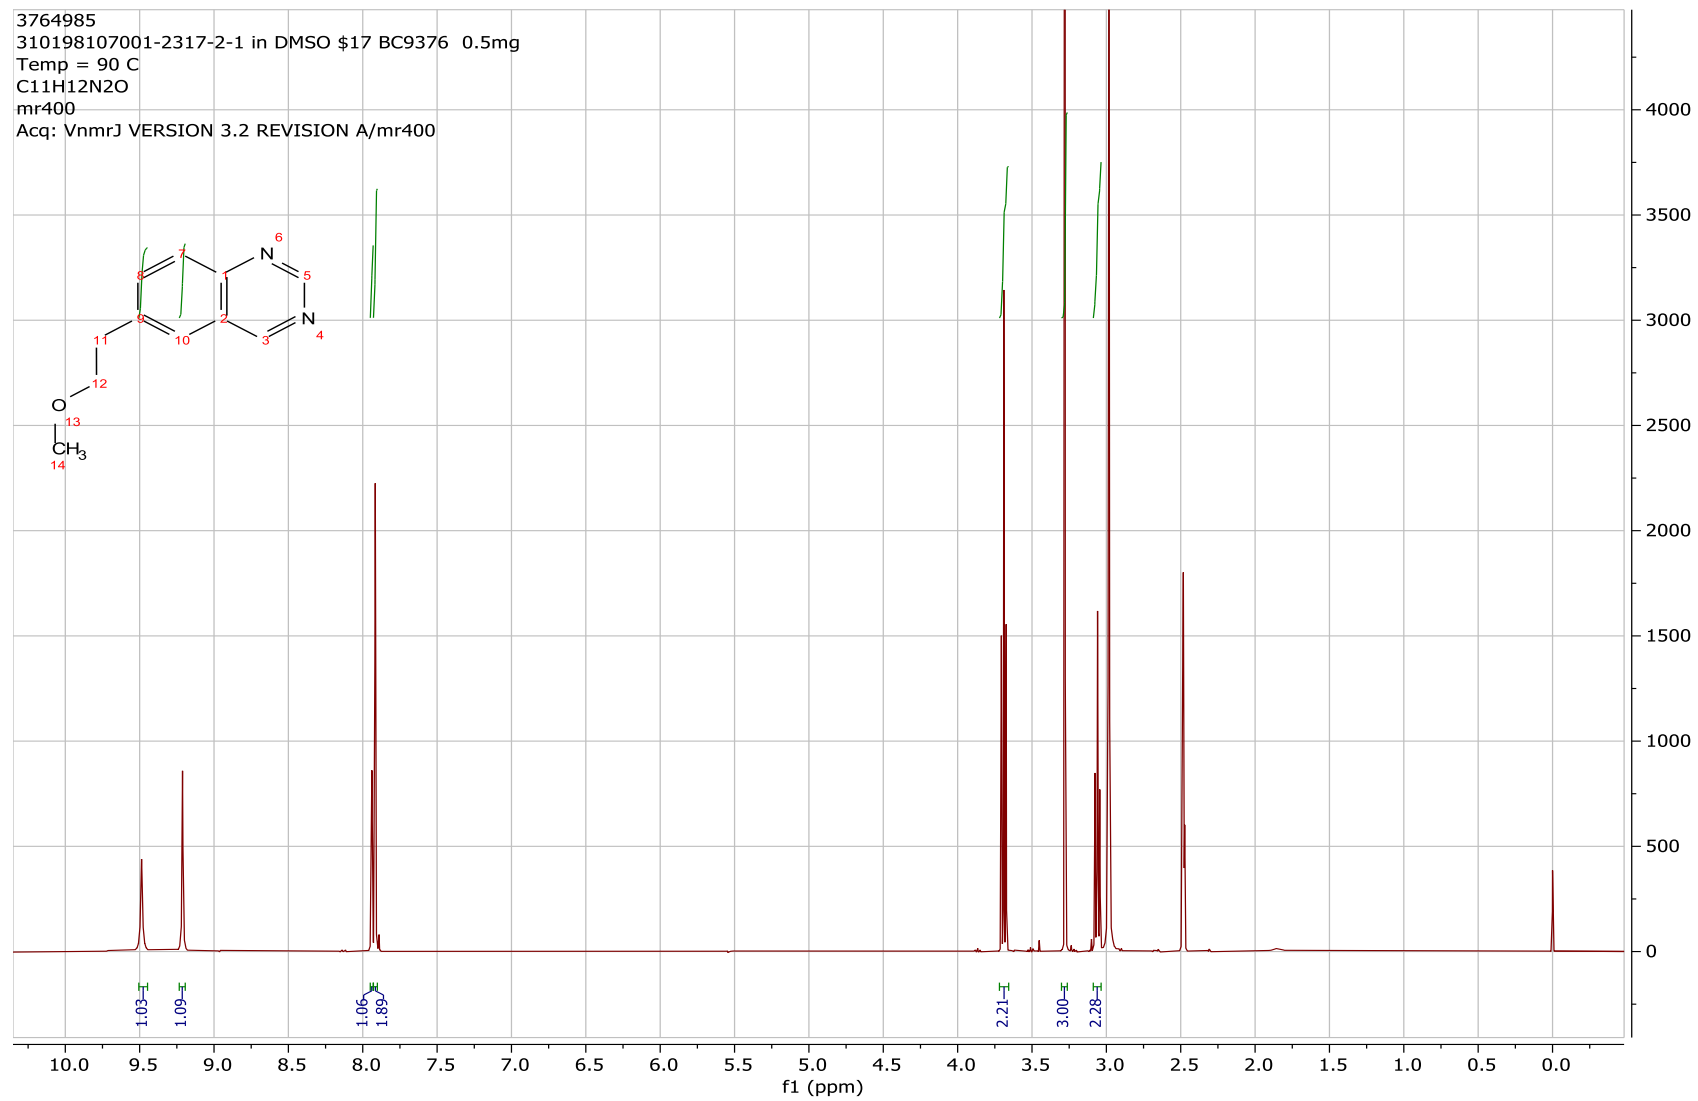

# Compound 94 <sup>13</sup>C NMR

3978419.brk.1.fid  
310198107001-2317-2-1 in DMSO \$19 BC2635 6.28mg

C11H12N2O  
s400

Acq:topspin3.6.1/s400

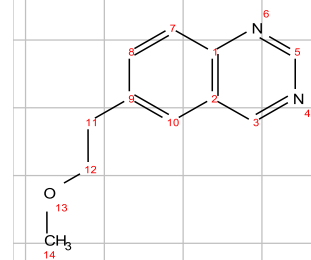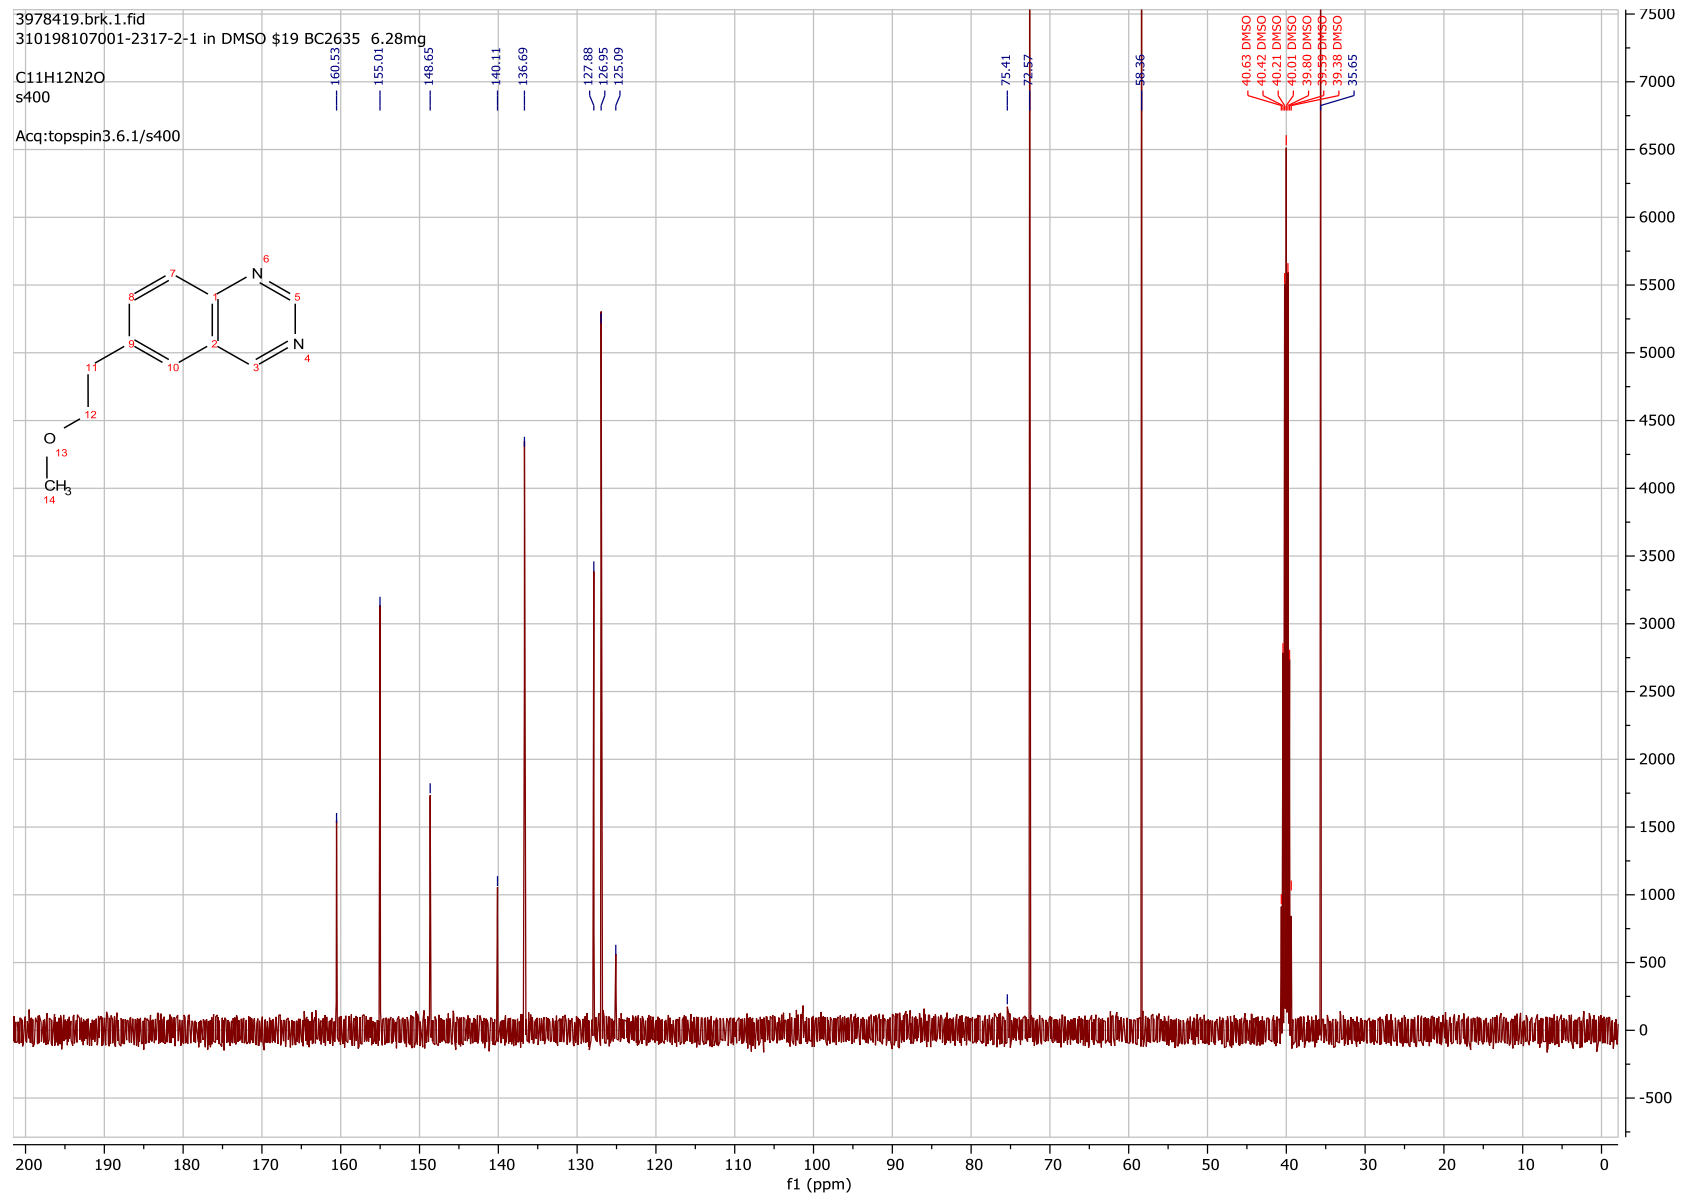

# Compound 95 <sup>1</sup>H NMR

3764989  
310198107001-2317-3-1 in DMSO  $\delta$ 17 BC9377 0.5mg  
Temp = 90 C  
C<sub>12</sub>H<sub>12</sub>N<sub>2</sub>O  
mr400  
Acq: VnmrJ VERSION 3.2 REVISION A/mr400

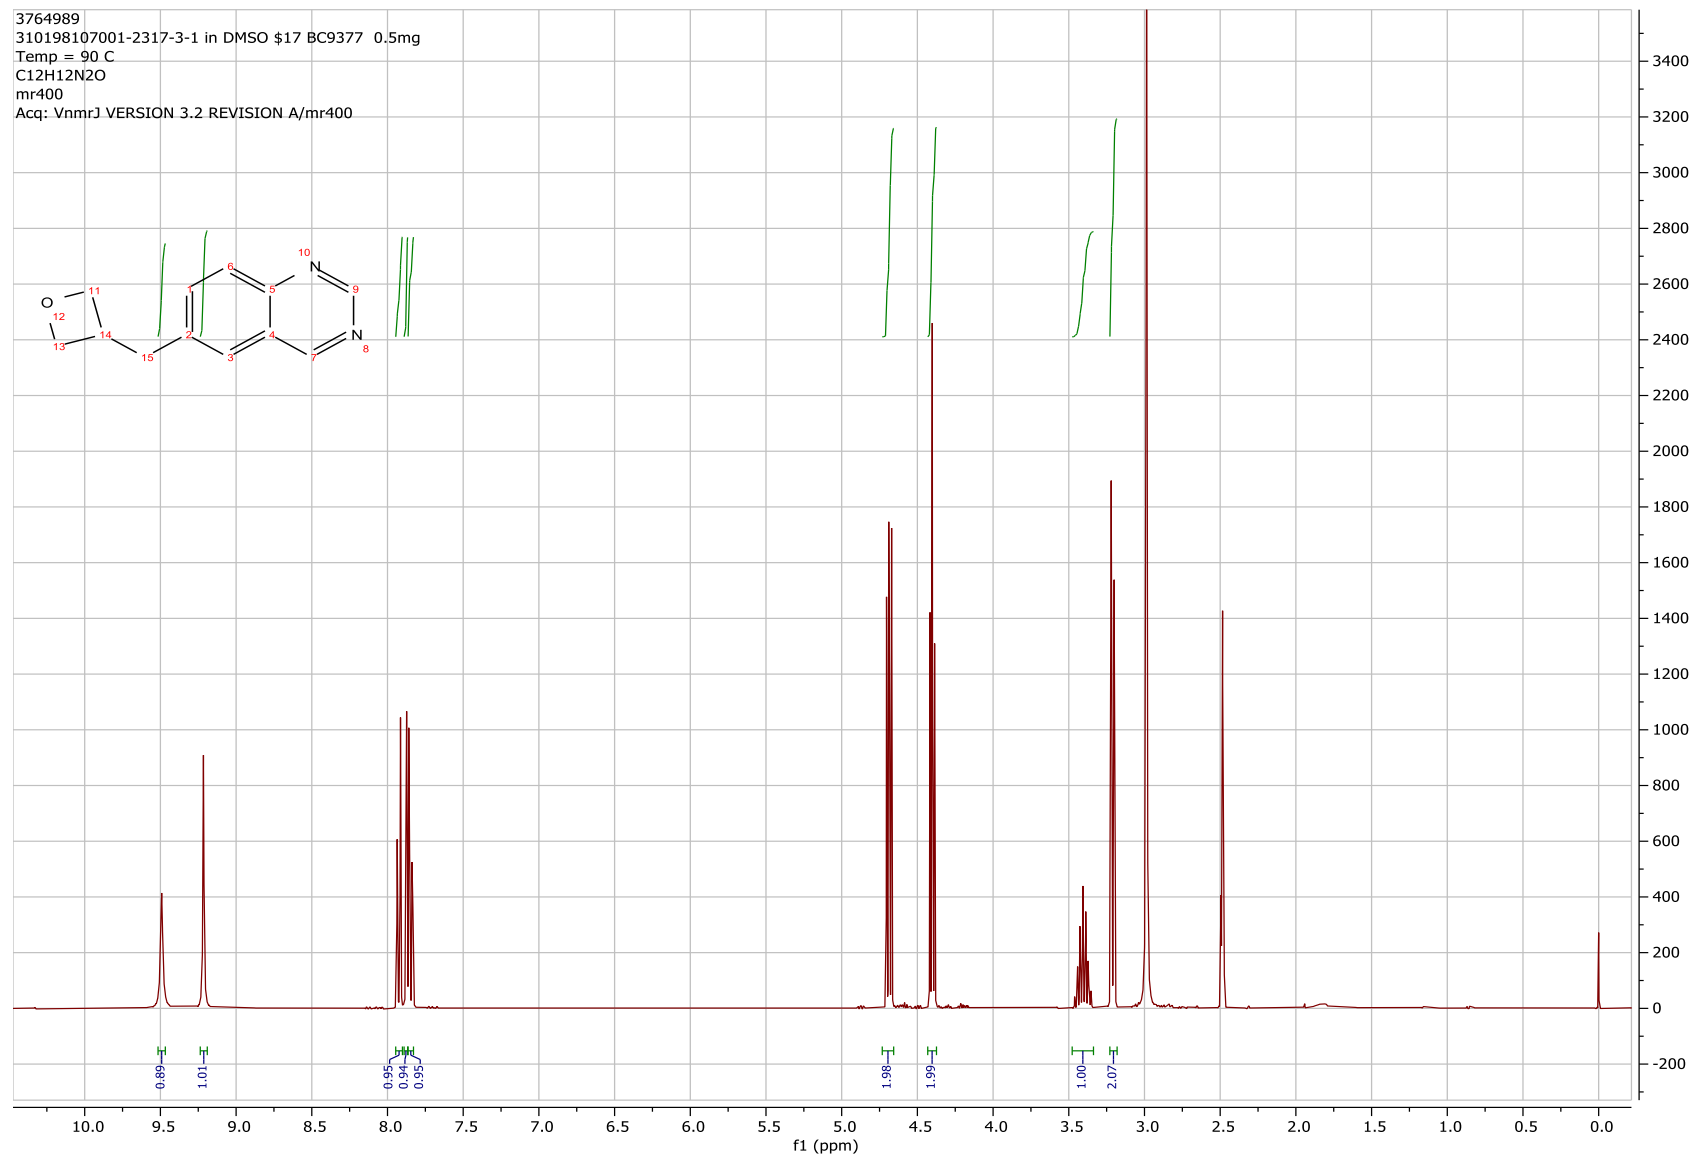

# Compound 95 <sup>13</sup>C NMR

3979608  
310198107001-2317-3-1 in DMSO \$19 BC2636 9mg  
Temp = 27 C  
C12H12N2O1  
mrs400  
Acq: VnmrJ VERSION 3.2 REVISION A/mrs400

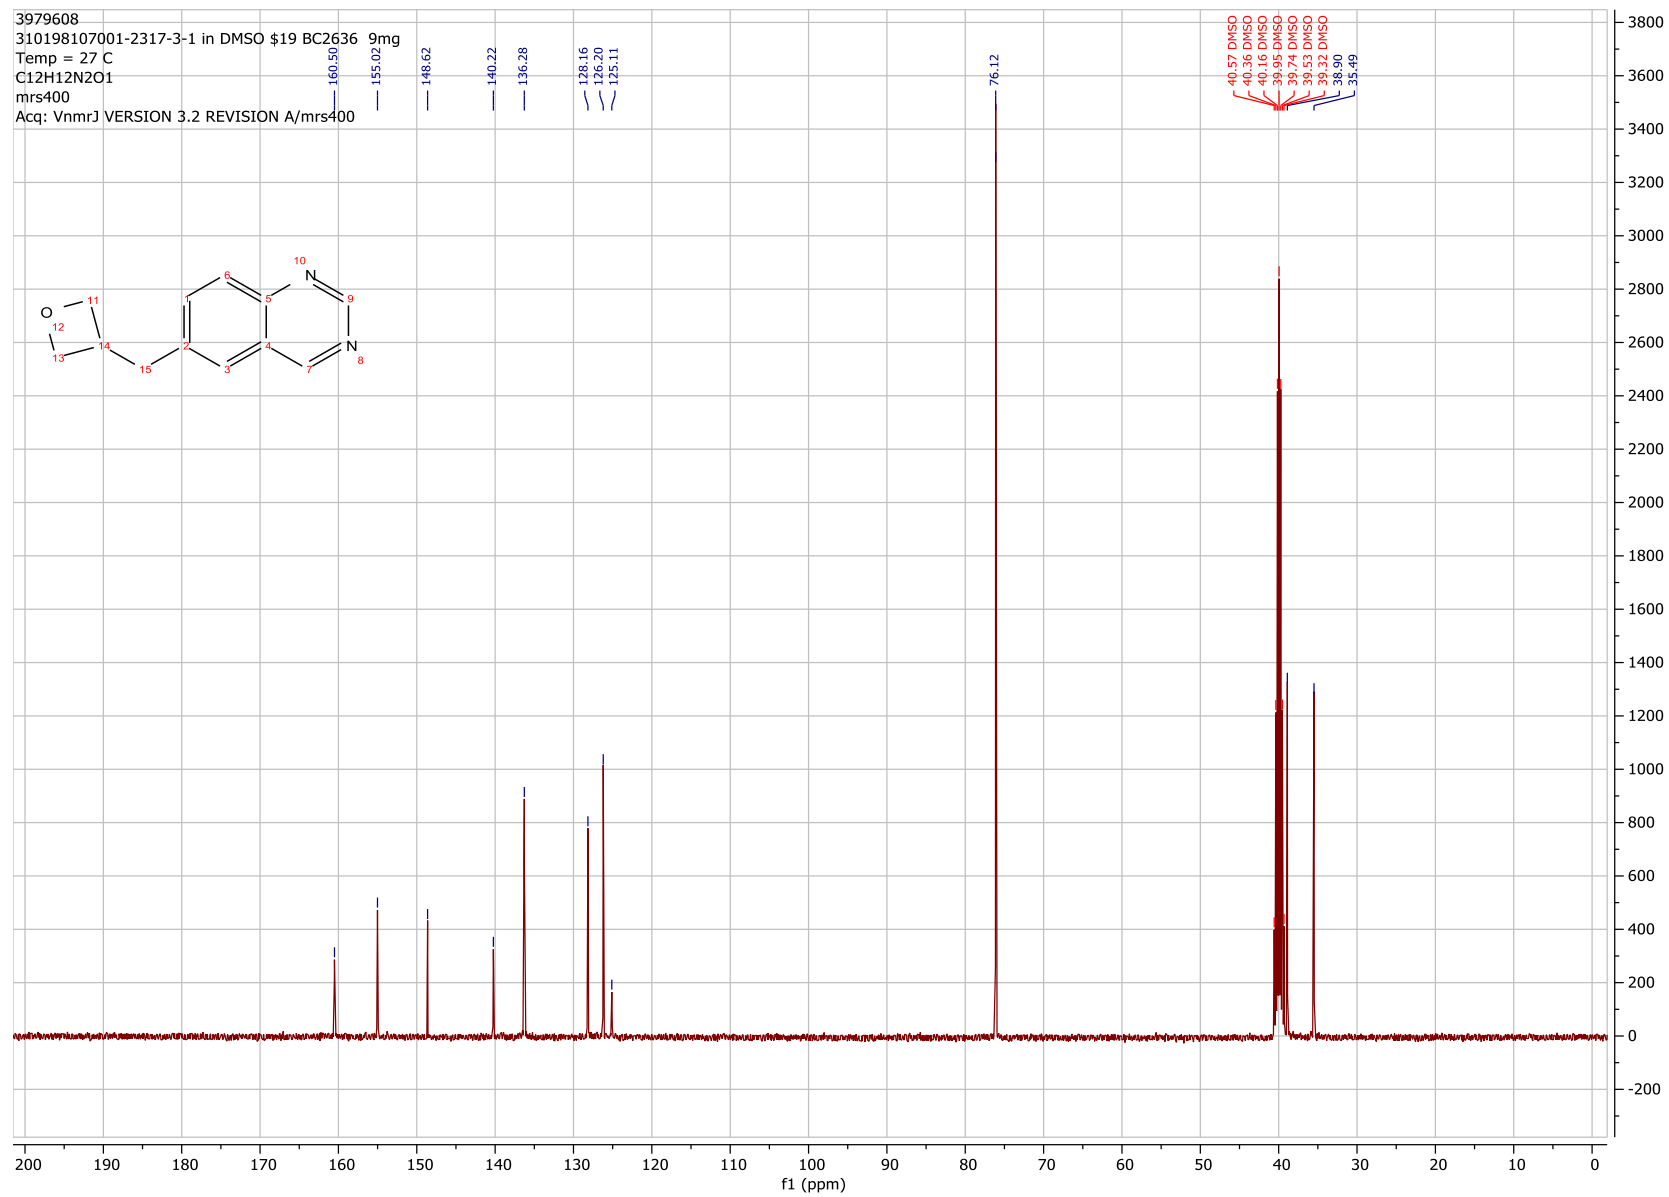



# Compound 98 <sup>1</sup>H NMR

3764991  
310198107001-2317-4-1 in DMSO  $\delta$ 17 BC9378 0.5mg  
Temp = 90 C  
C12H12N2  
mr400  
Acq: VnmrJ VERSION 3.2 REVISION A/mr400

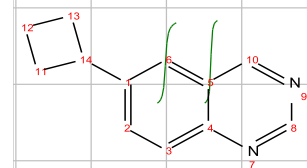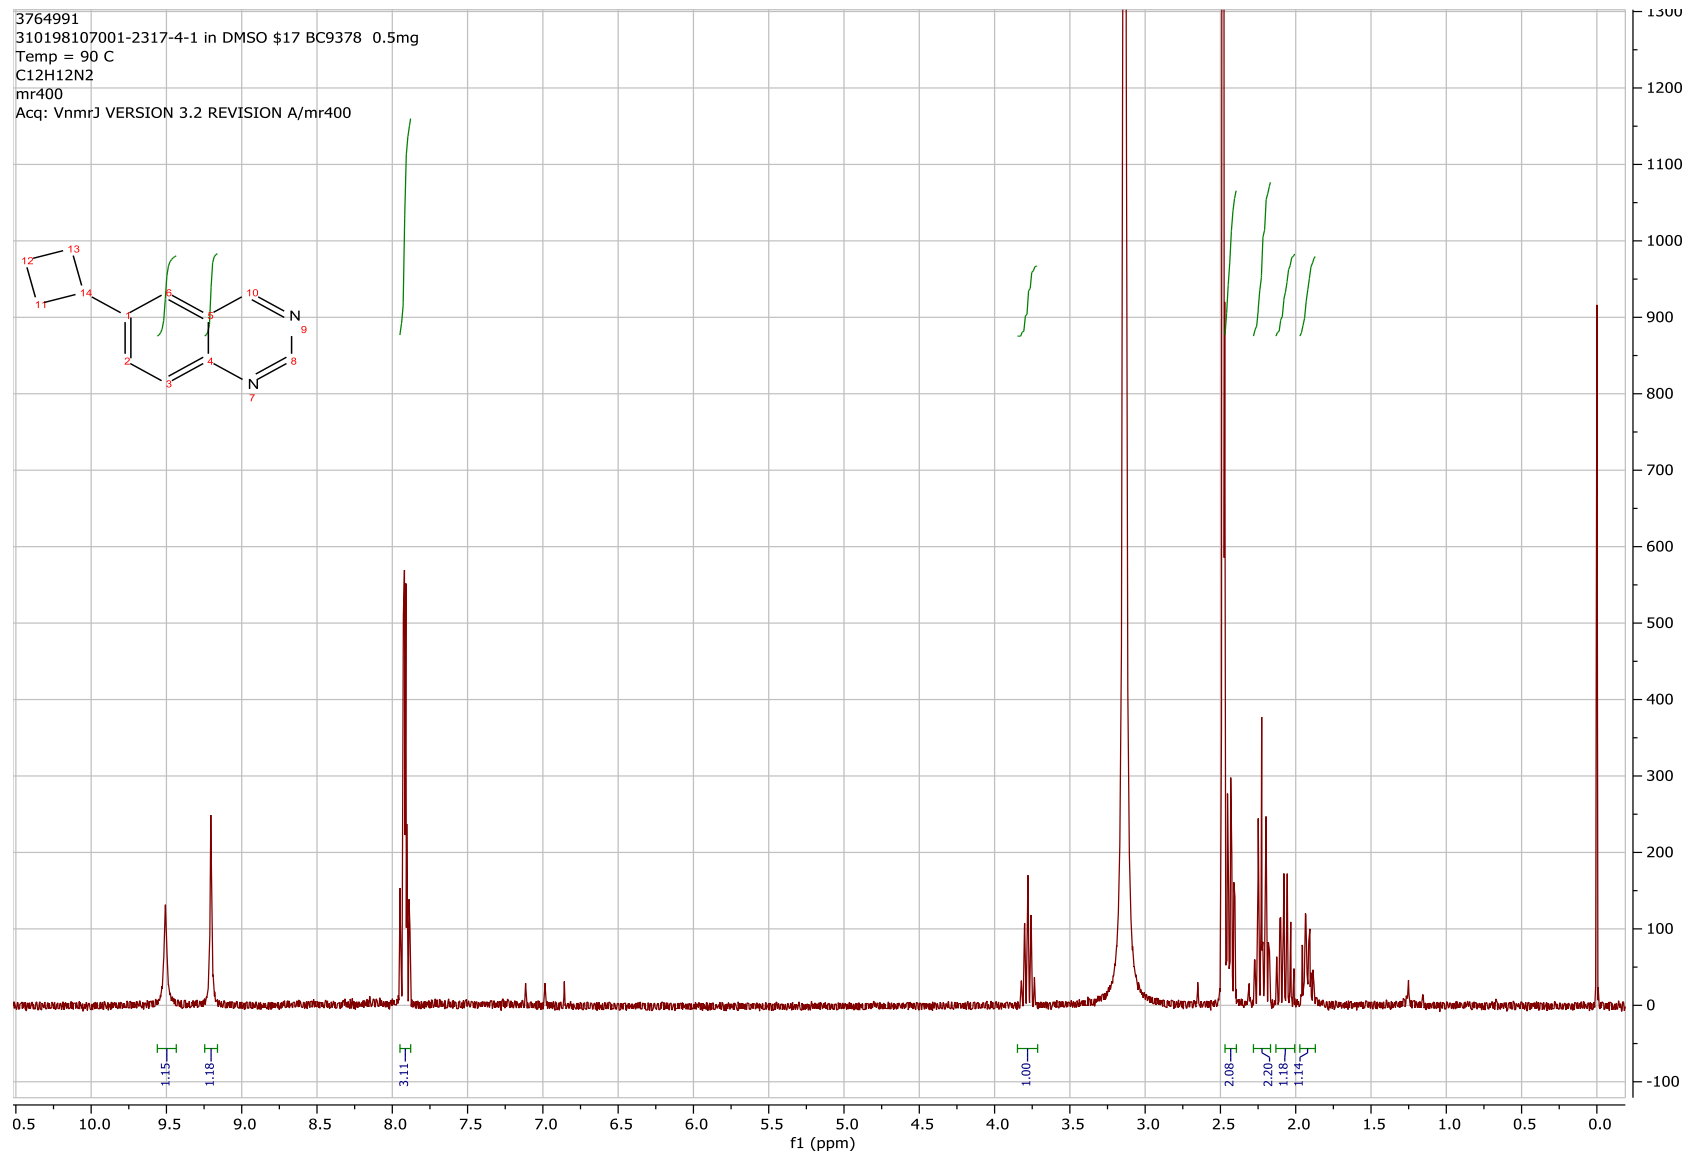

# Compound 98 <sup>13</sup>C NMR

3979847  
310198107001-2317-4-1 in DMSO \$20 BC2645 5mg  
Temp = 27 C  
C12H12N2  
mrs400  
Acq: VnmrJ VERSION 3.2 REVISION A/mrs400

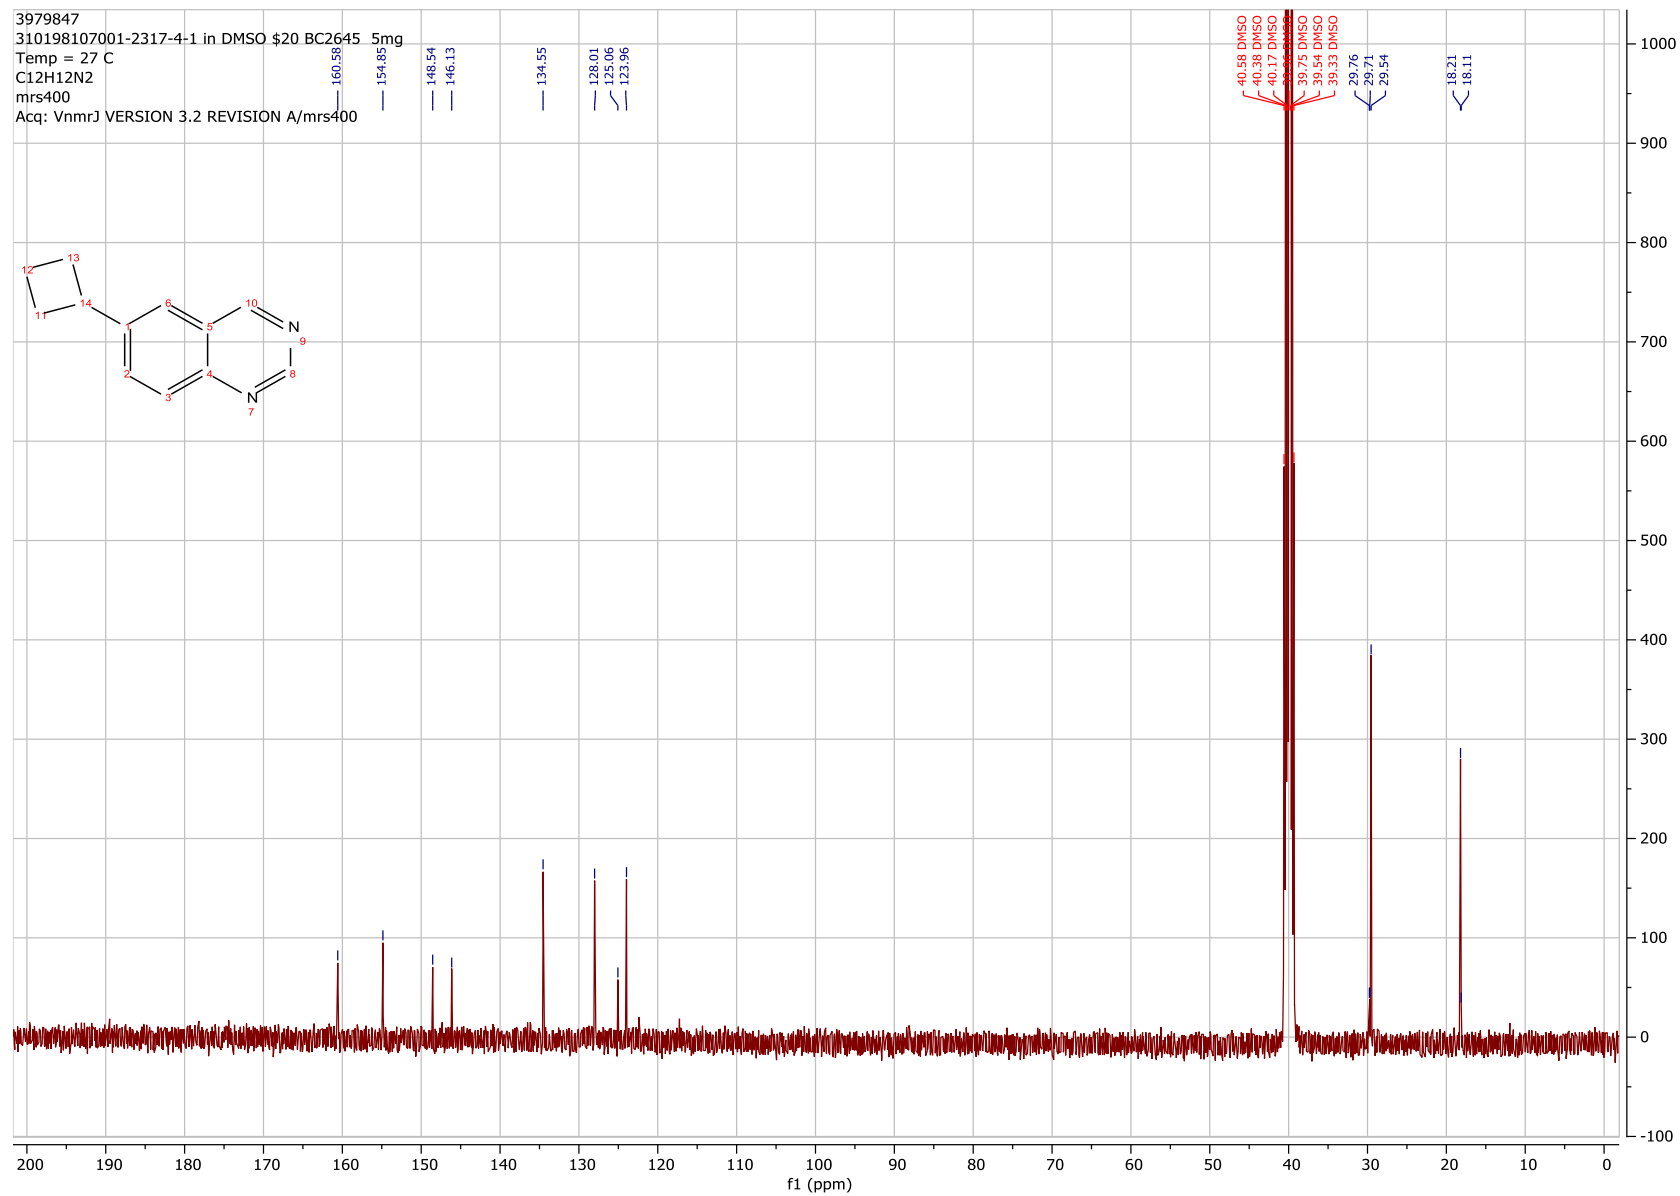

# Compound 112 <sup>1</sup>HNMR

3968961  
310198107001-2396-1-1 in DMSO  $\delta$ 13 BC8444 0.5mg  
Temp = 25 C  
C10H11N3O  
mrs400  
Acq: VnmrJ VERSION 3.2 REVISION A/mrs400

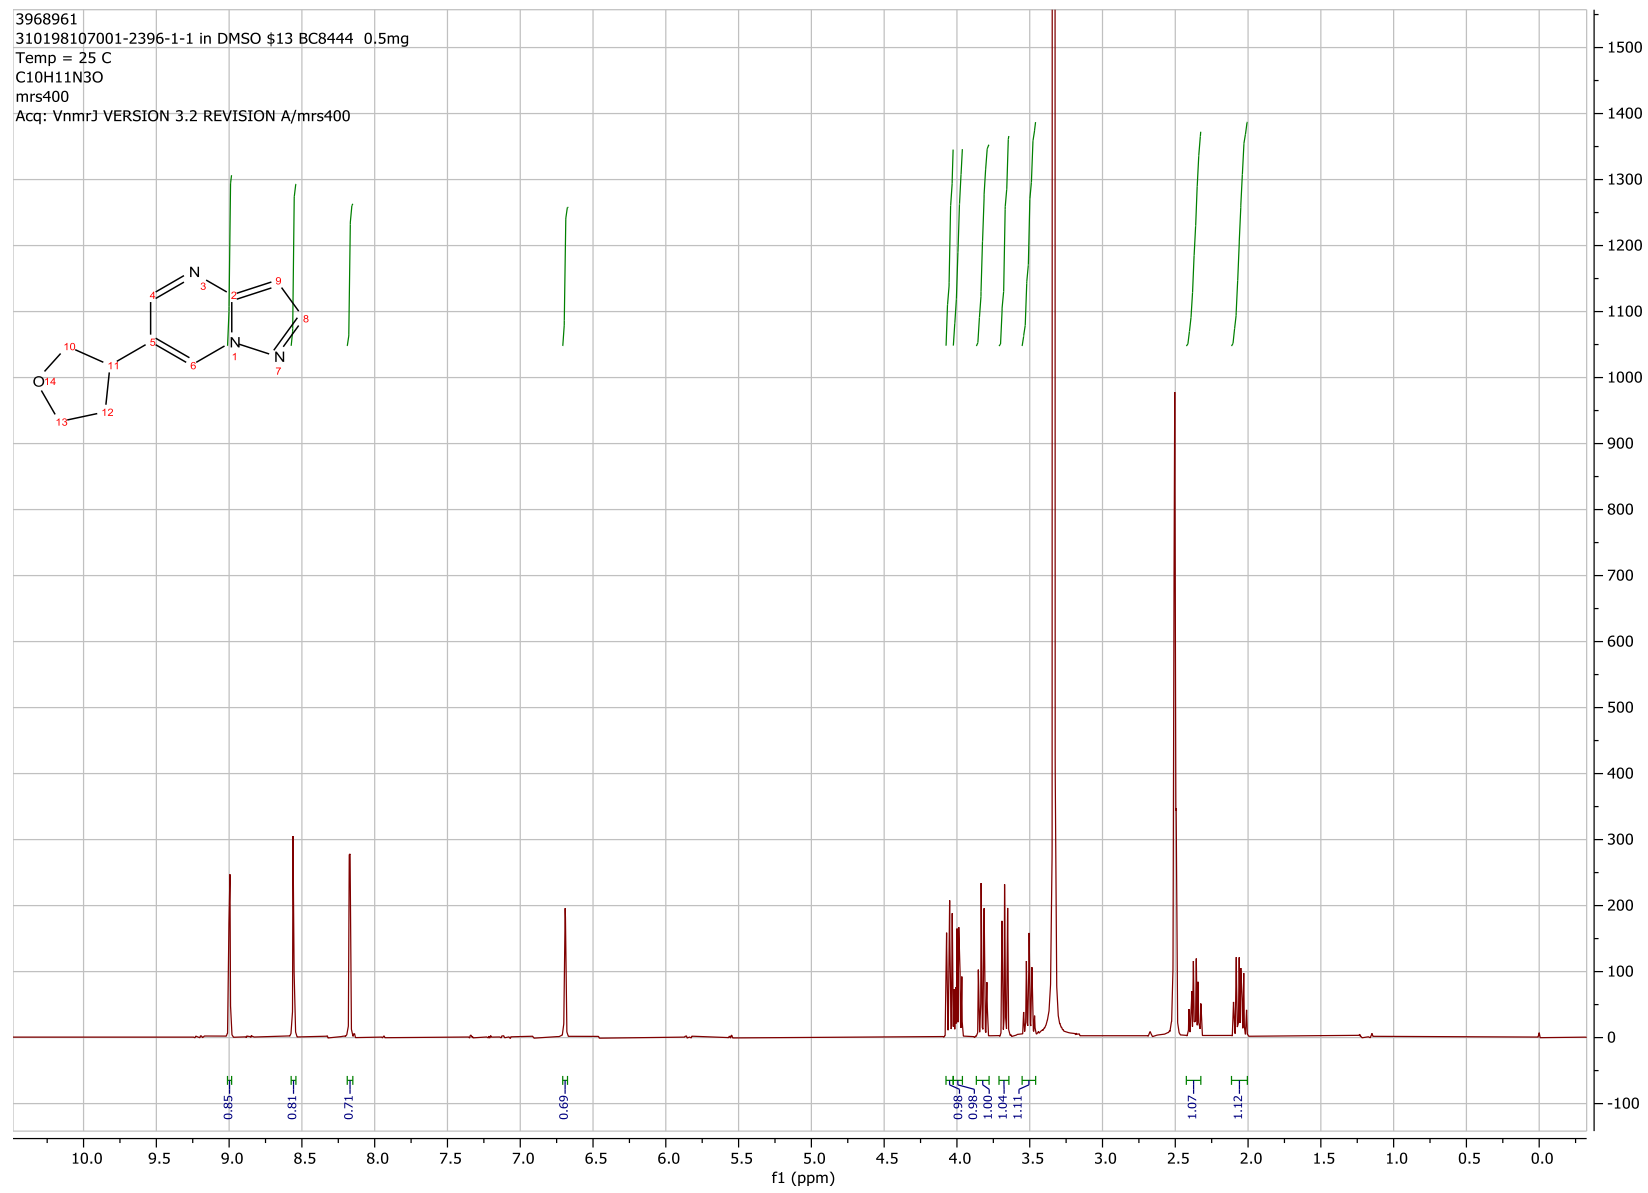

# Compound 112 <sup>13</sup>C NMR

3994716  
310198107001-2404-3-1 in DMSO  $\phi$ 02 BC2656 10.0mg  
Temp = 27 C  
C10H11N3O  
mrs400  
Acq: VnmrJ VERSION 3.2 REVISION A/mrs400

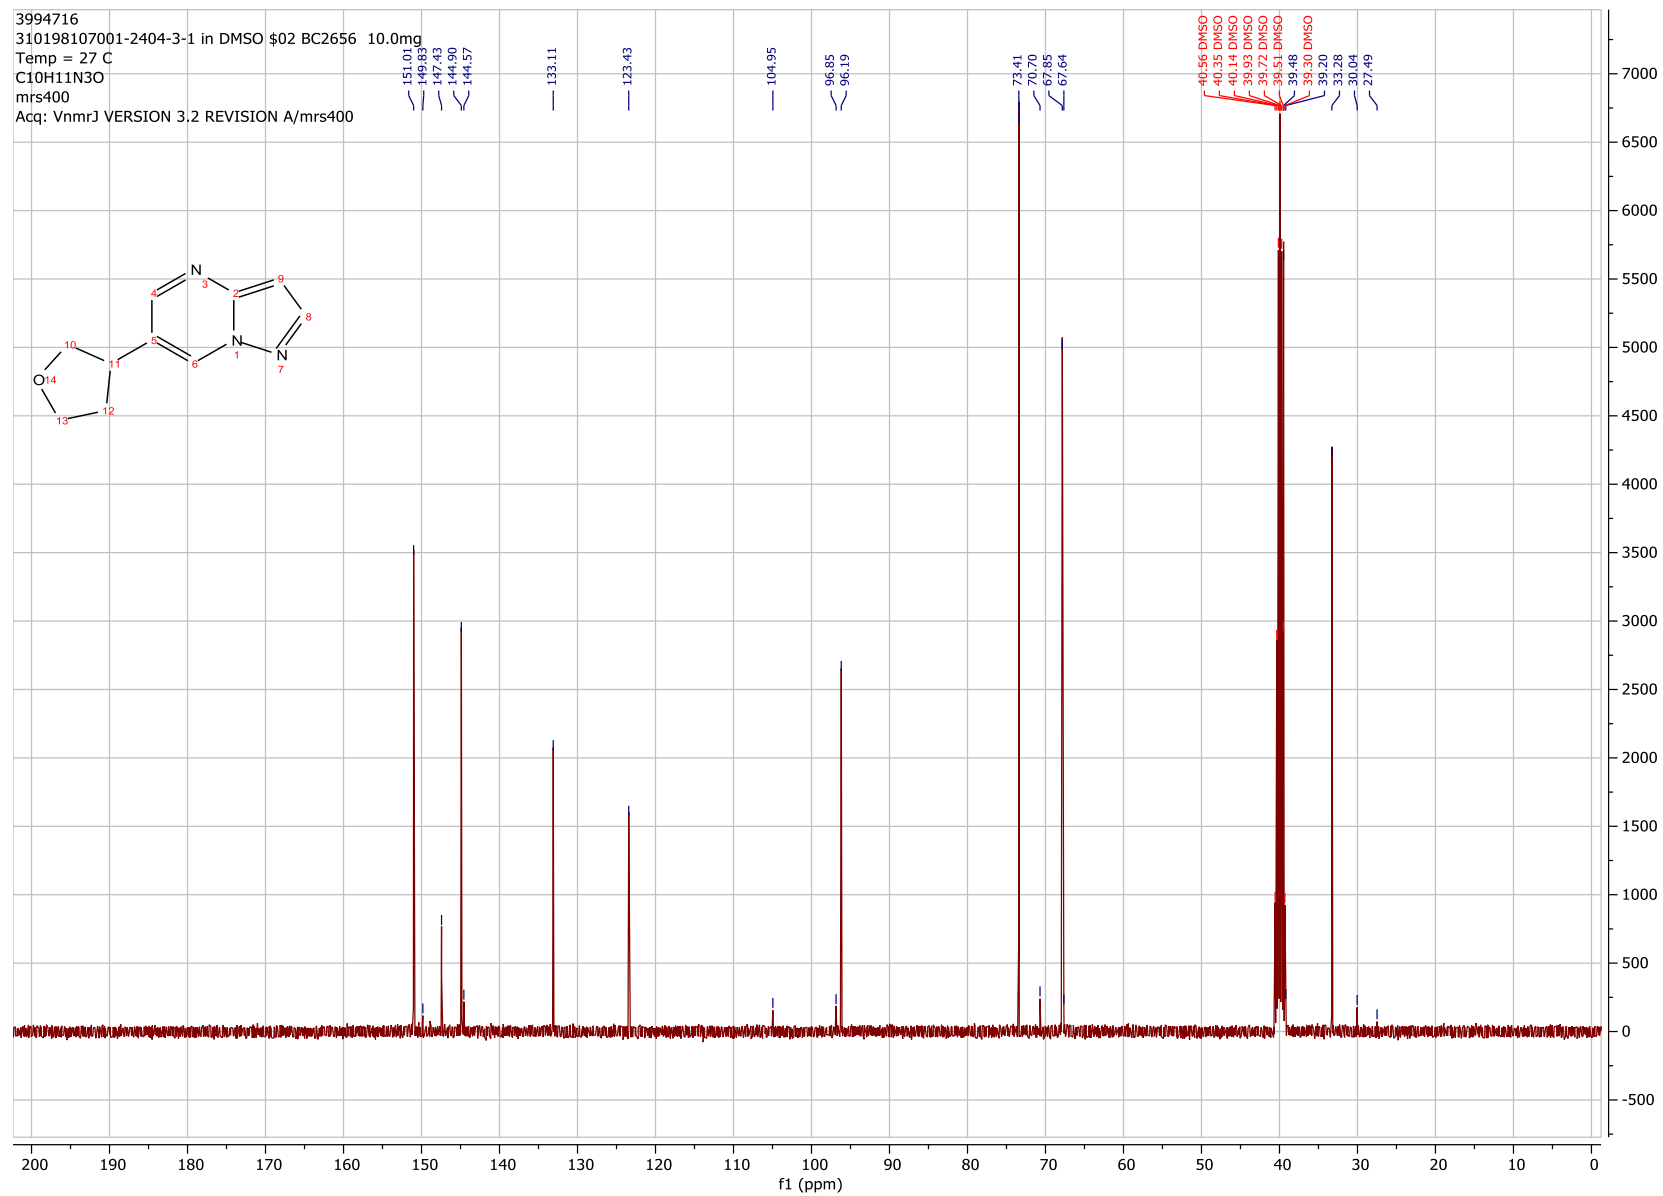

# Compound 113 <sup>1</sup>H NMR

3677432  
310198107001-2228-2-1 in DMSO d<sub>6</sub> BC8667 0.5mg  
Temp = 90 C  
C<sub>13</sub>H<sub>17</sub>N<sub>3</sub>O  
mr400  
Acq: VnmrJ VERSION 3.2 REVISION A/mr400

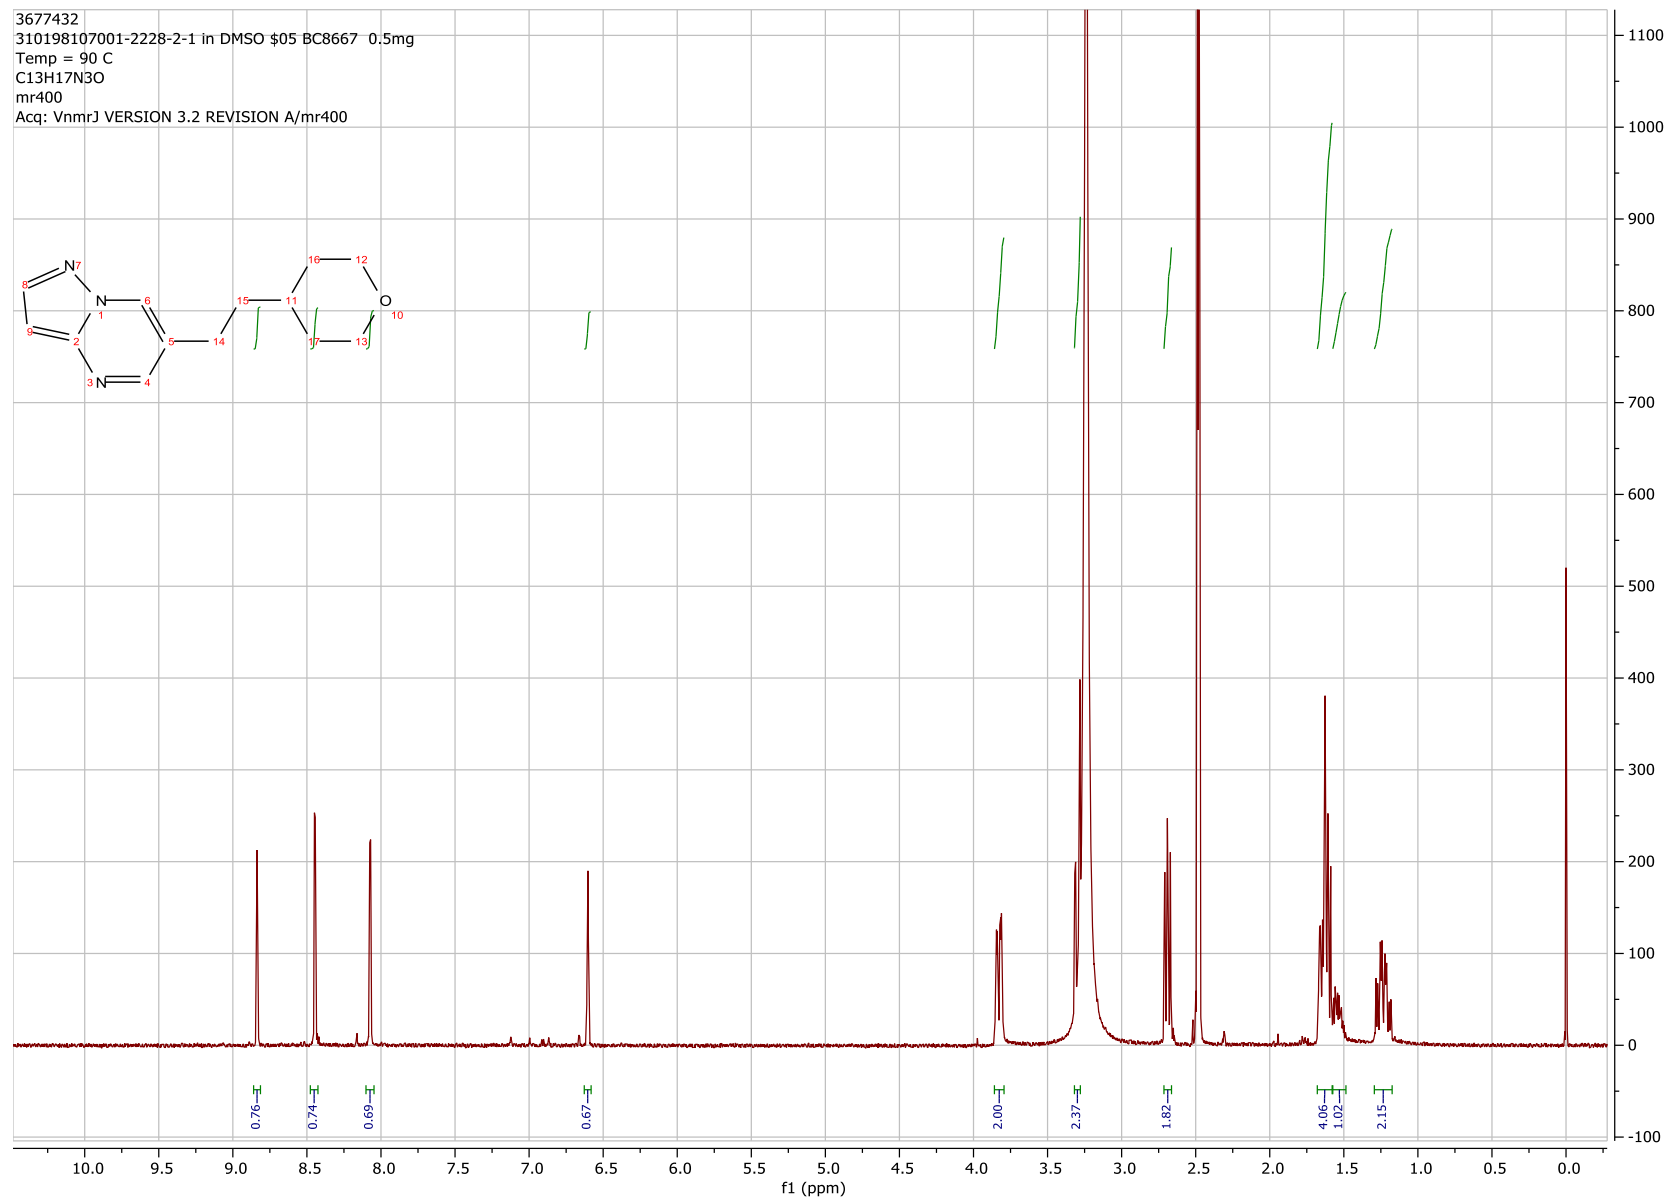

# Compound 113 <sup>13</sup>C NMR

3978176.brk.1.fid  
310198107001-2396-2-1 in DMSO  $\delta$ 13 BC2637 9mg

C13H17N3  
s400

Acq:topspin3.6.1/s400

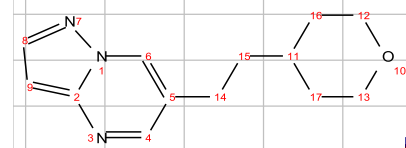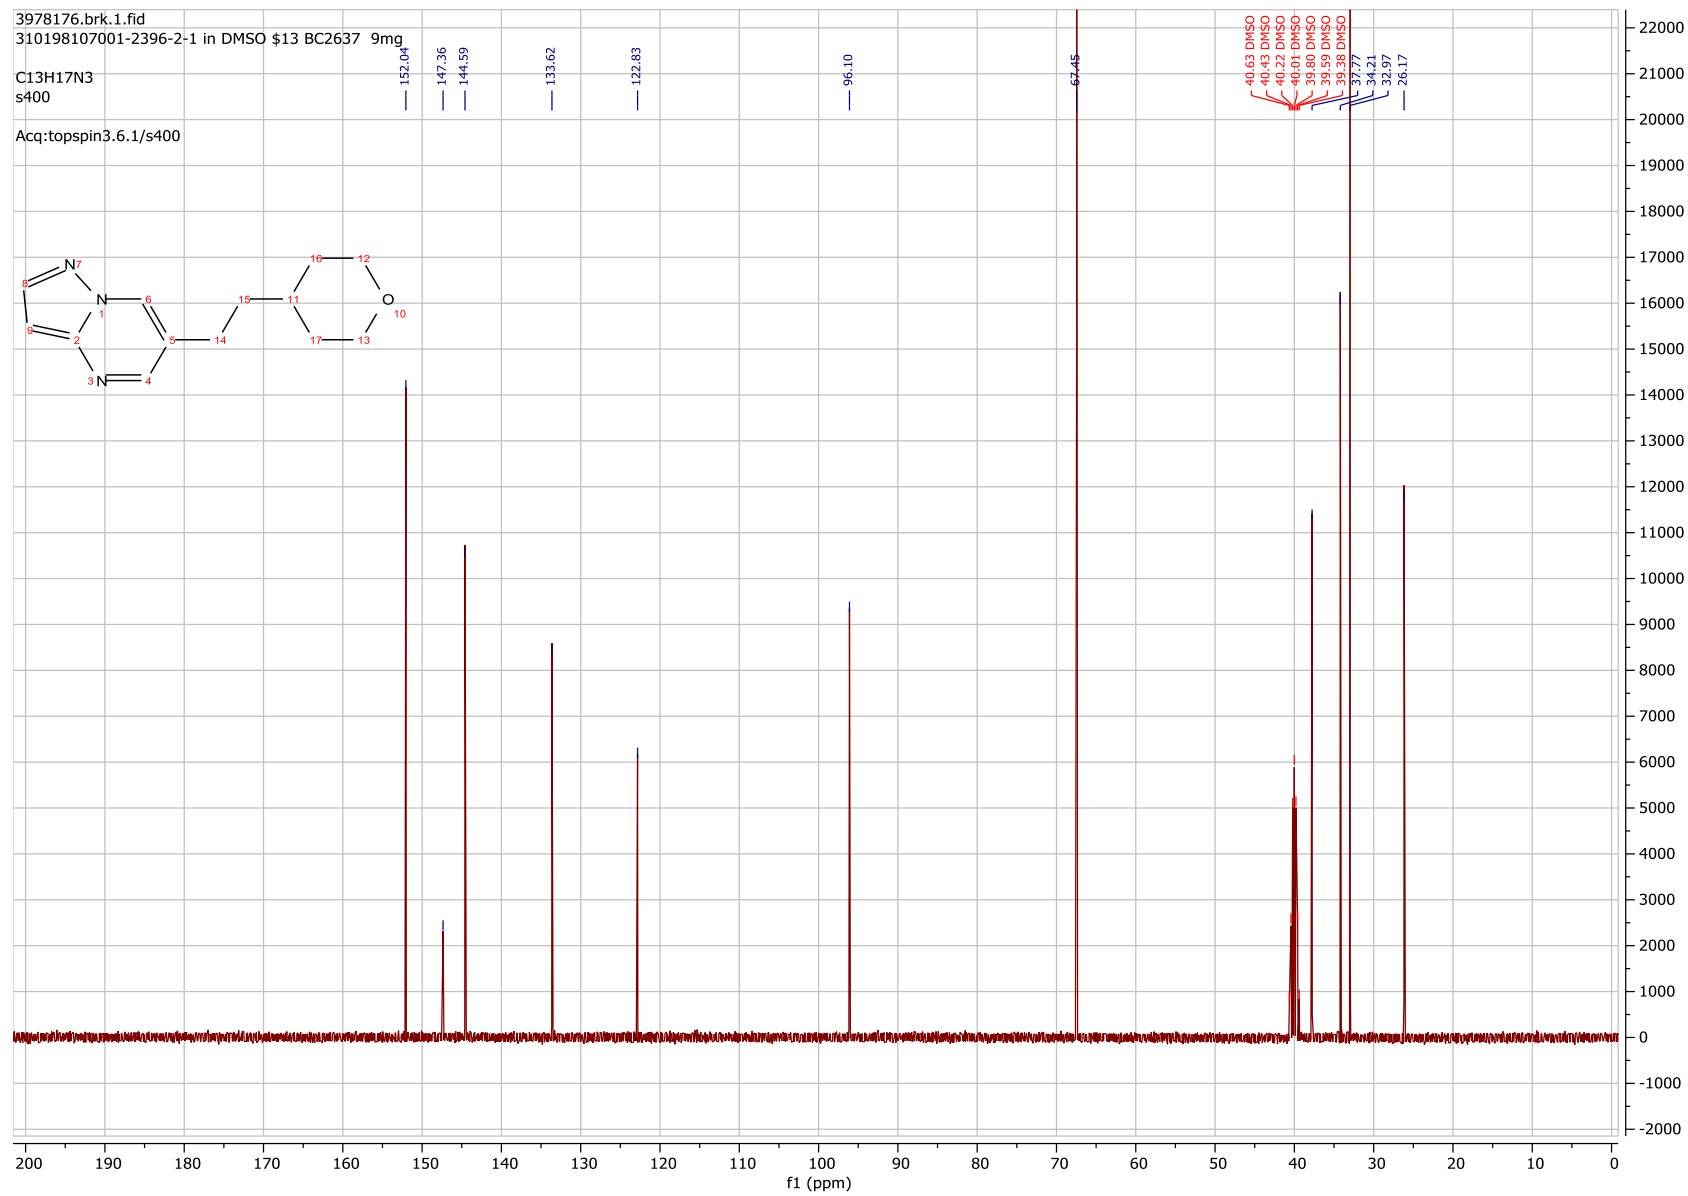

# Compound 118 <sup>1</sup>HNMR

3677455  
310198107001-2228-5-1 in DMSO  $\phi$ 05 BC8671 0.5mg  
Temp = 90 C  
C<sub>16</sub>H<sub>20</sub>F<sub>2</sub>N<sub>4</sub>O<sub>2</sub>  
mr400  
Acq: VnmrJ VERSION 3.2 REVISION A/mr400

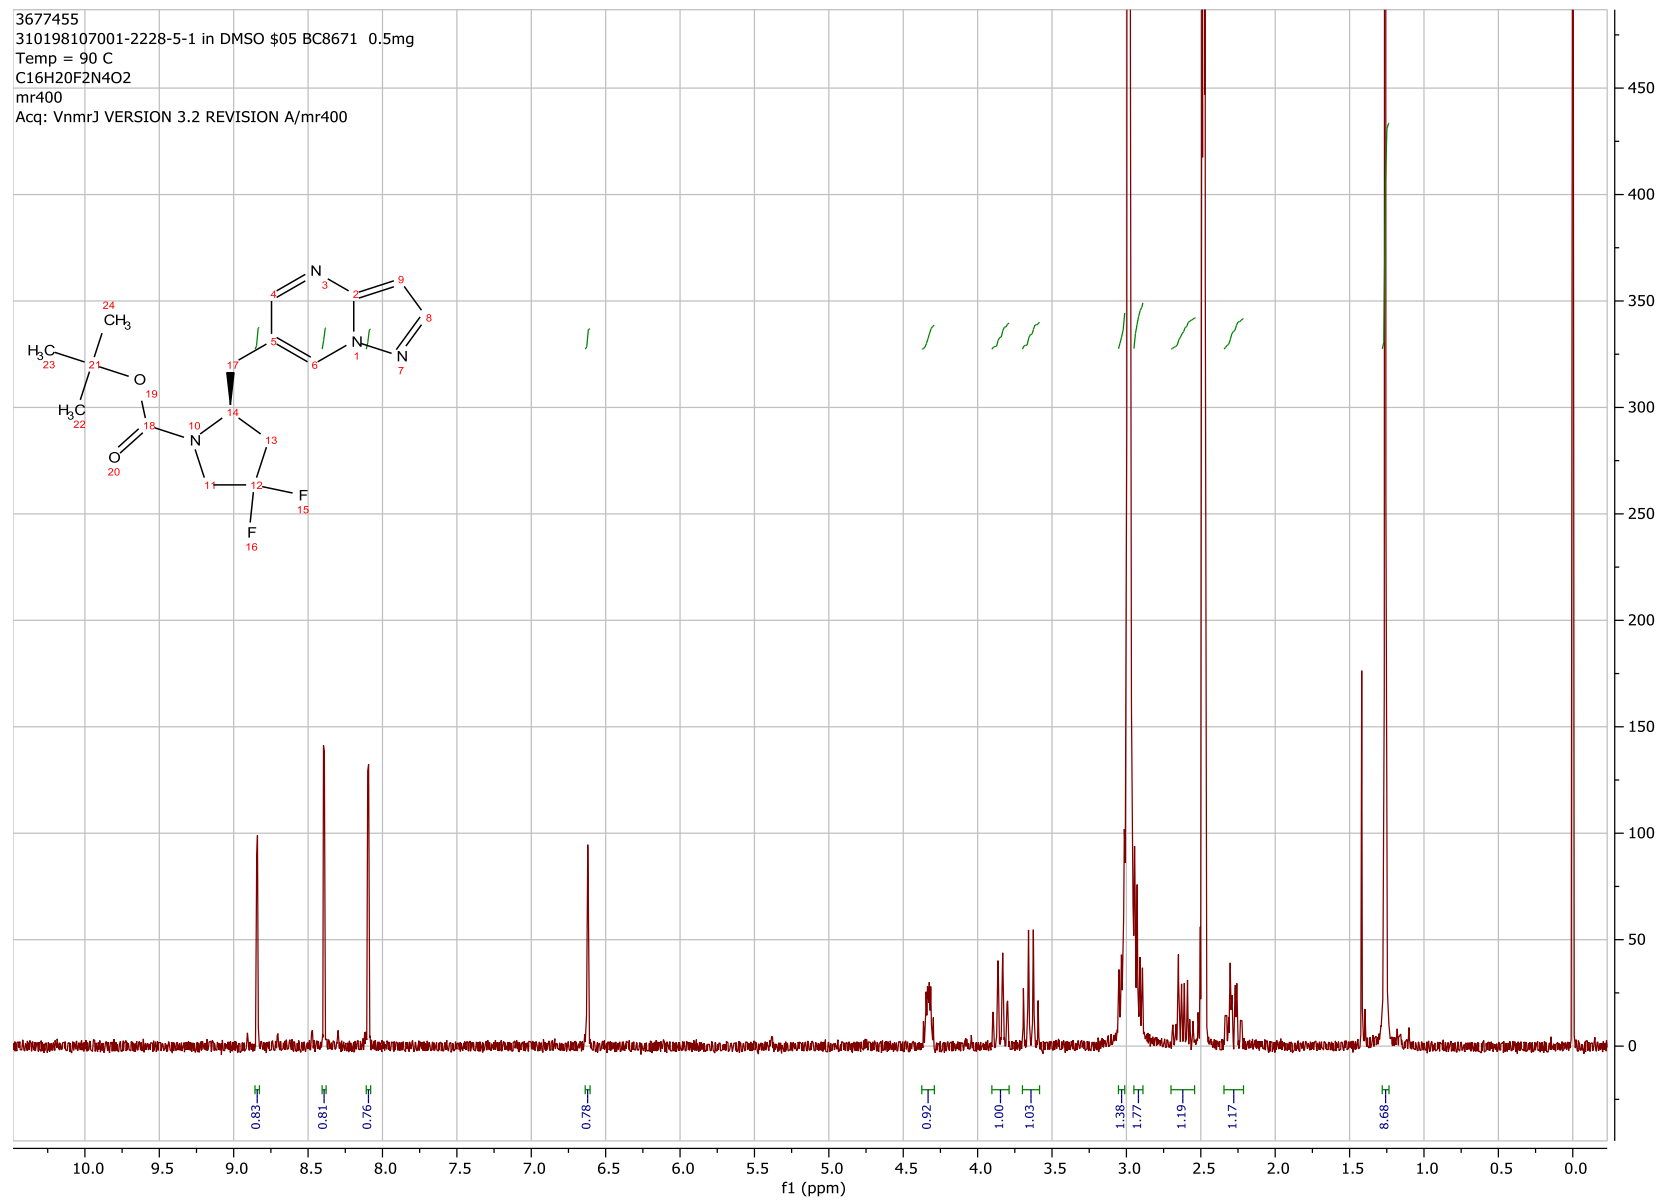

# Compound 118 <sup>13</sup>C NMR

3979820.brk.1.fid  
310198107001-2228-5-1 in DMSO  $\delta$ 20 BC2646 5.2mg

C<sub>16</sub>H<sub>20</sub>N<sub>4</sub>O<sub>2</sub>F  
s400

Acq:topspin3.6.1/s400

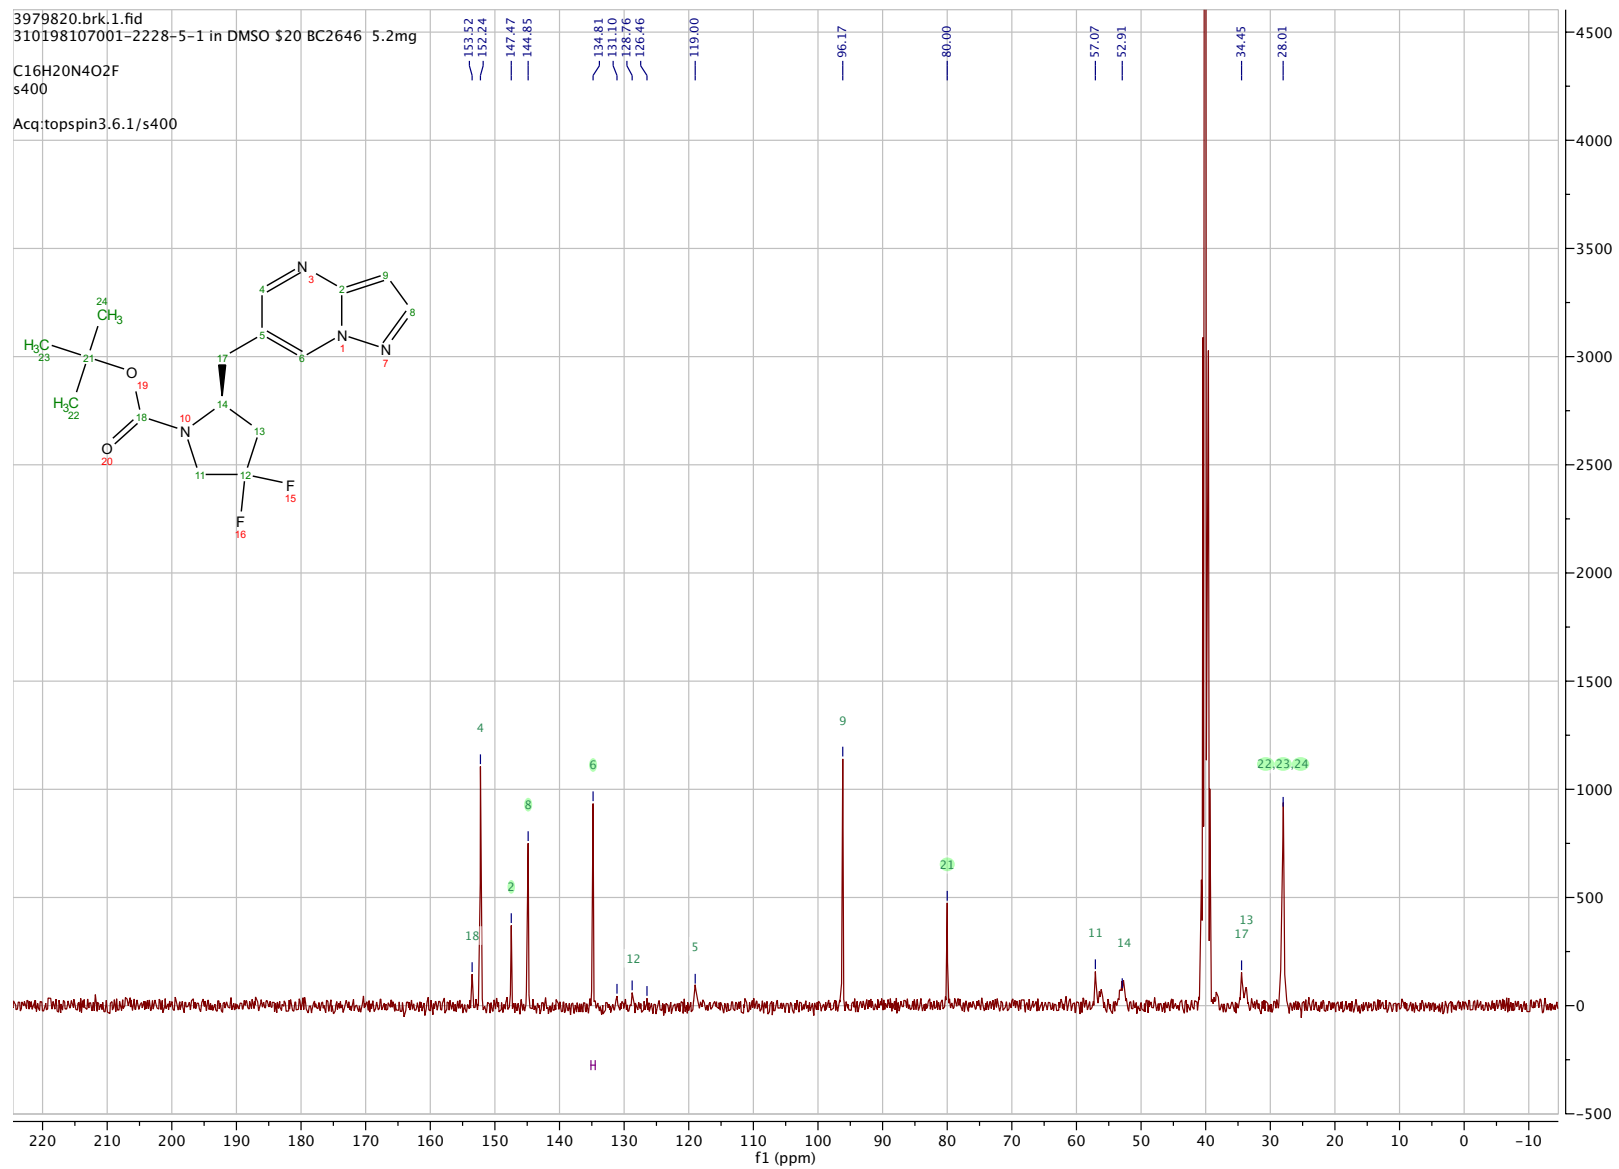



# Compound 128 <sup>1</sup>H NMR

3969073  
310198107001-2396-4-1 in DMSO  $\delta$ 13 BC8448 0.5mg  
Temp = 25 C  
C<sub>11</sub>H<sub>13</sub>N<sub>3</sub>  
mrs400  
Acq: VnmrJ VERSION 3.2 REVISION A/mrs400

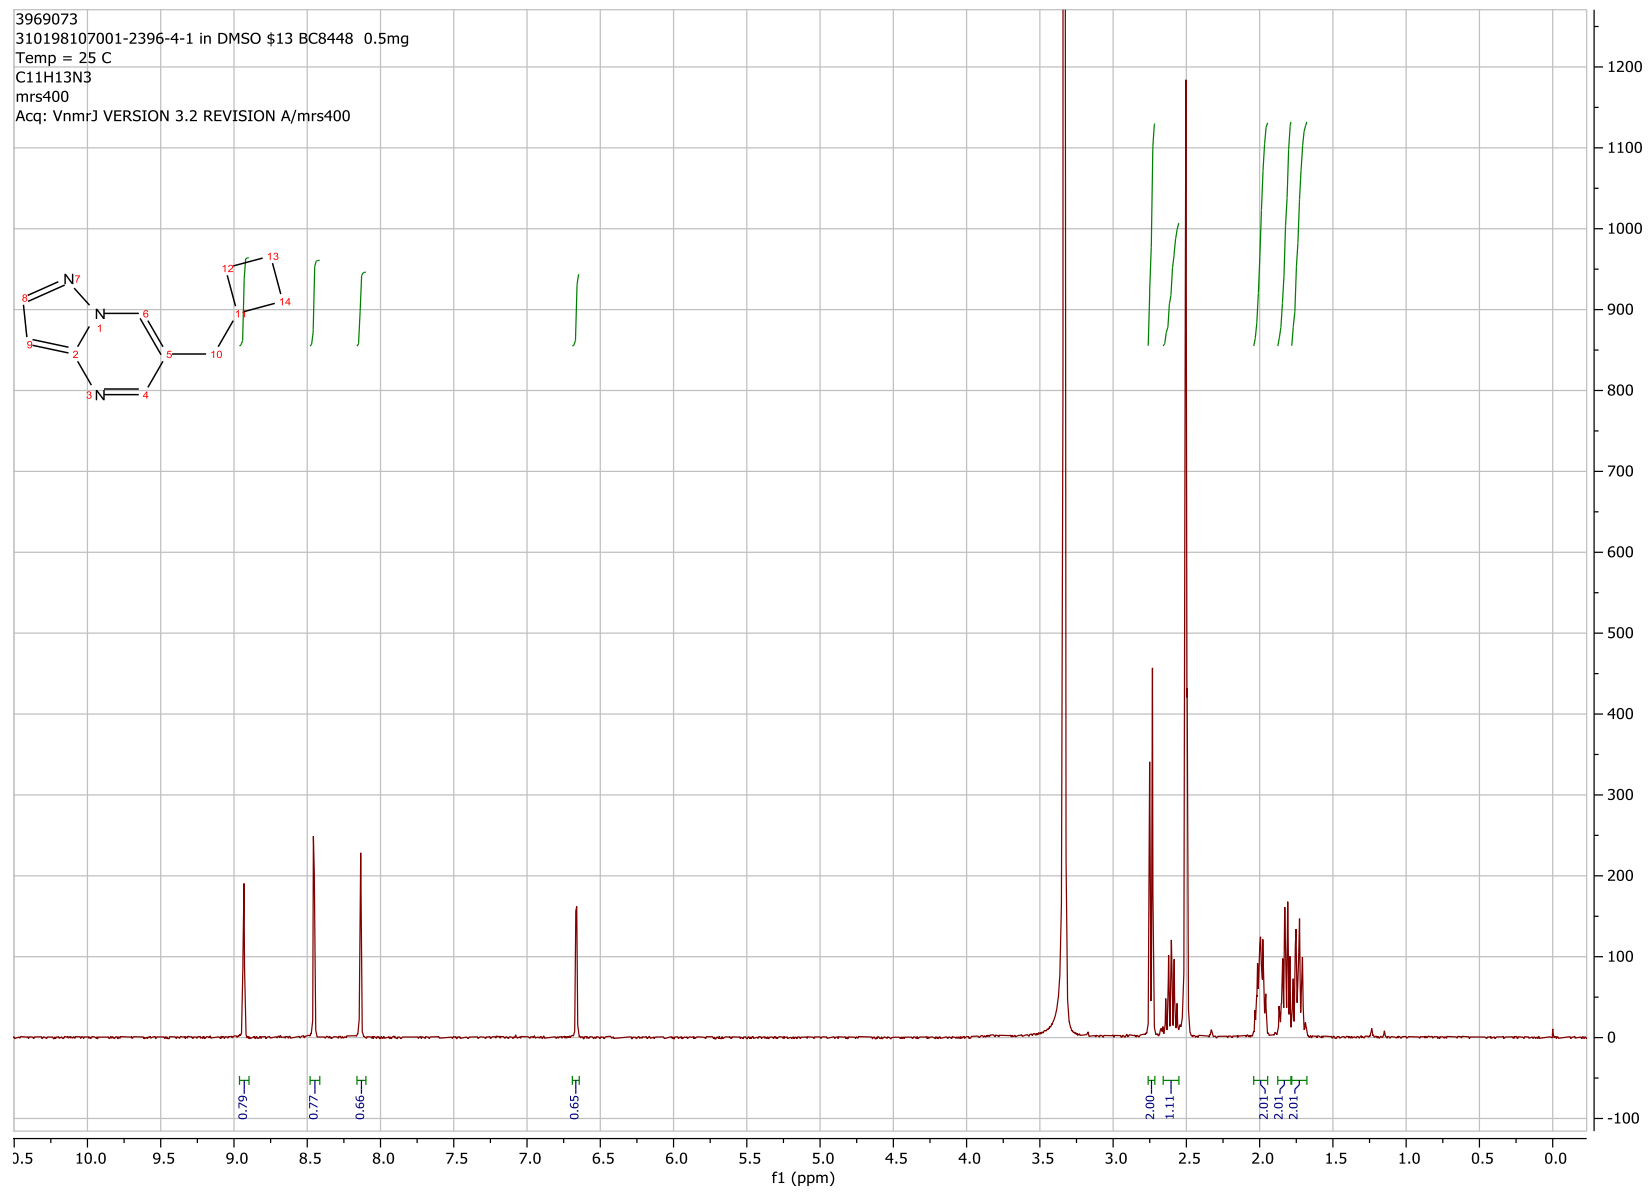

# Compound 128 <sup>13</sup>C NMR

3994403  
310198107001-2404-1-1 in DMSO  $\phi$ 02 BC2655 8.0mg  
Temp = 27 C  
C11H13N3  
mrs400  
Acq: VnmrJ VERSION 3.2 REVISION A/mrs400

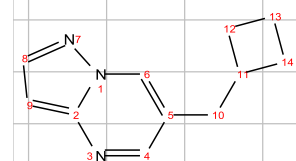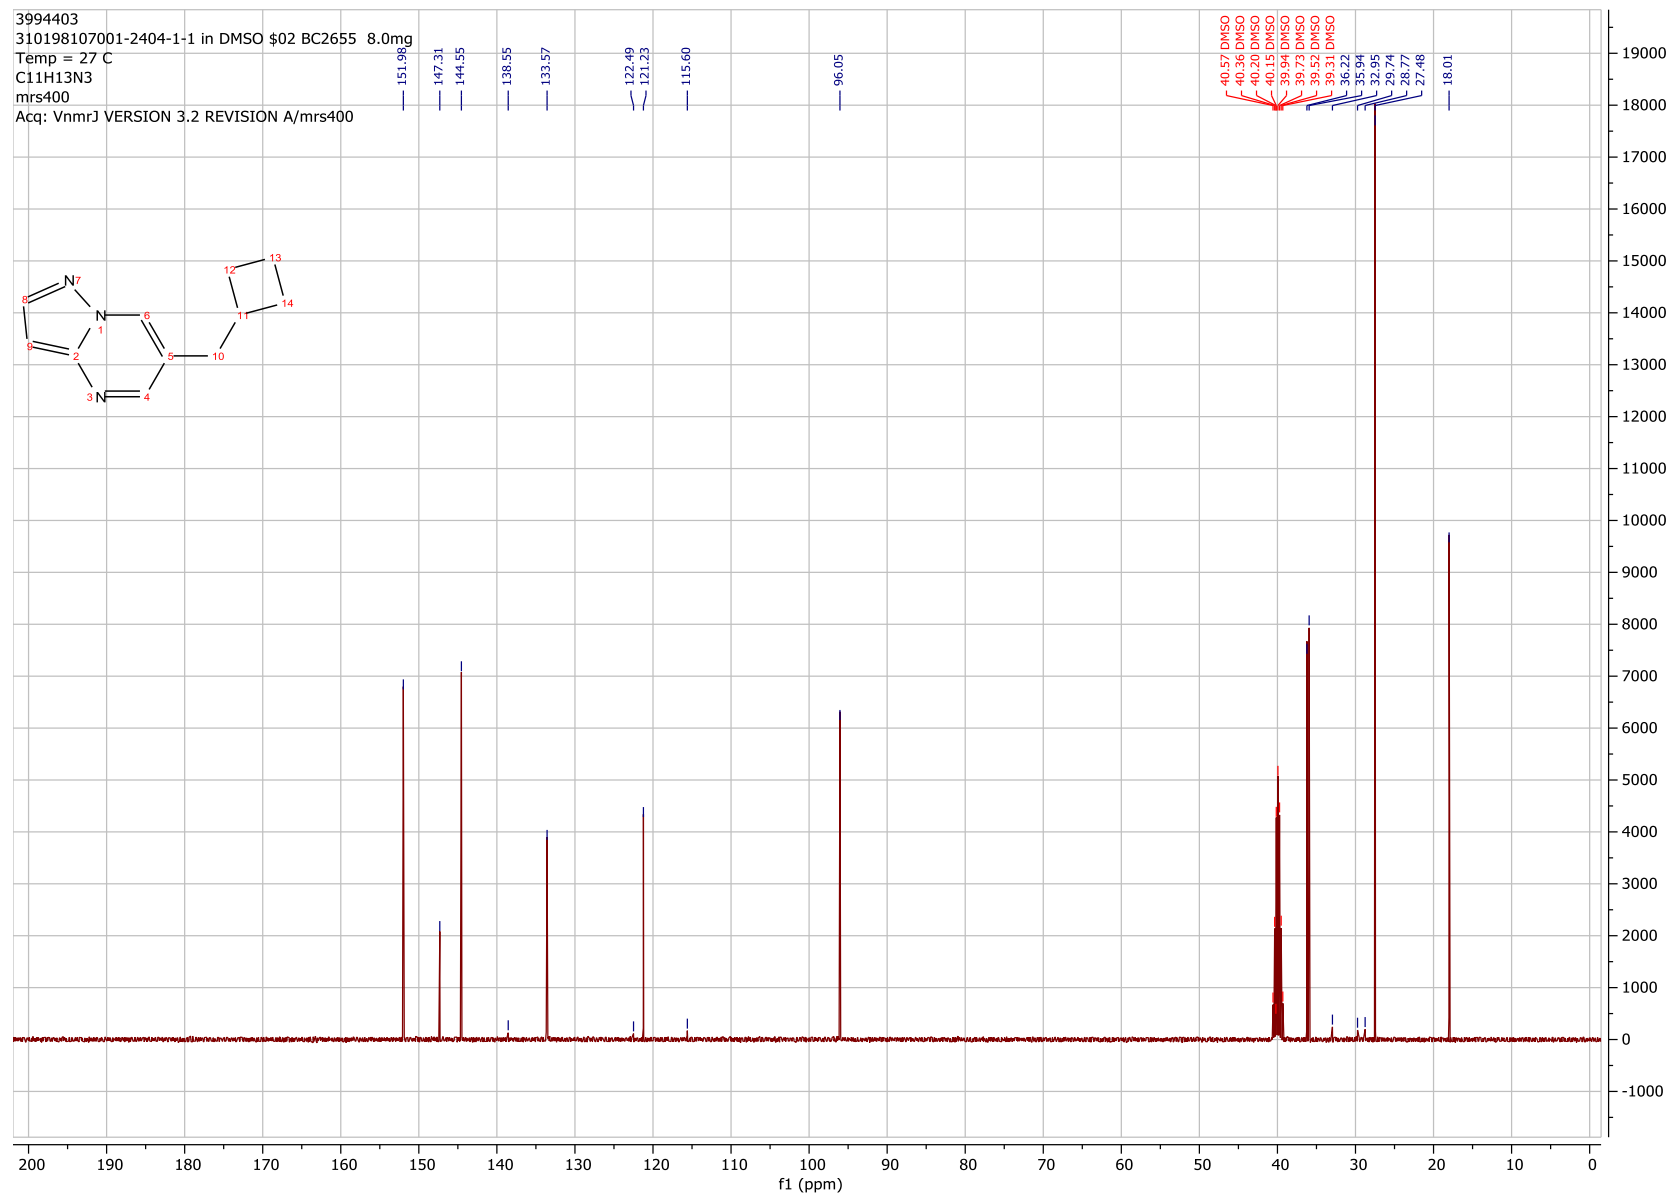

# Compound 130 <sup>1</sup>H NMR

3693499  
310198107001-2256-10-1 in DMSO  $\delta$ 12 BC7455 0.5mg  
Temp = 90 C  
C<sub>12</sub>H<sub>15</sub>N<sub>3</sub>O<sub>2</sub>  
mr400  
Acq: VnmrJ VERSION 3.2 REVISION A/mr400

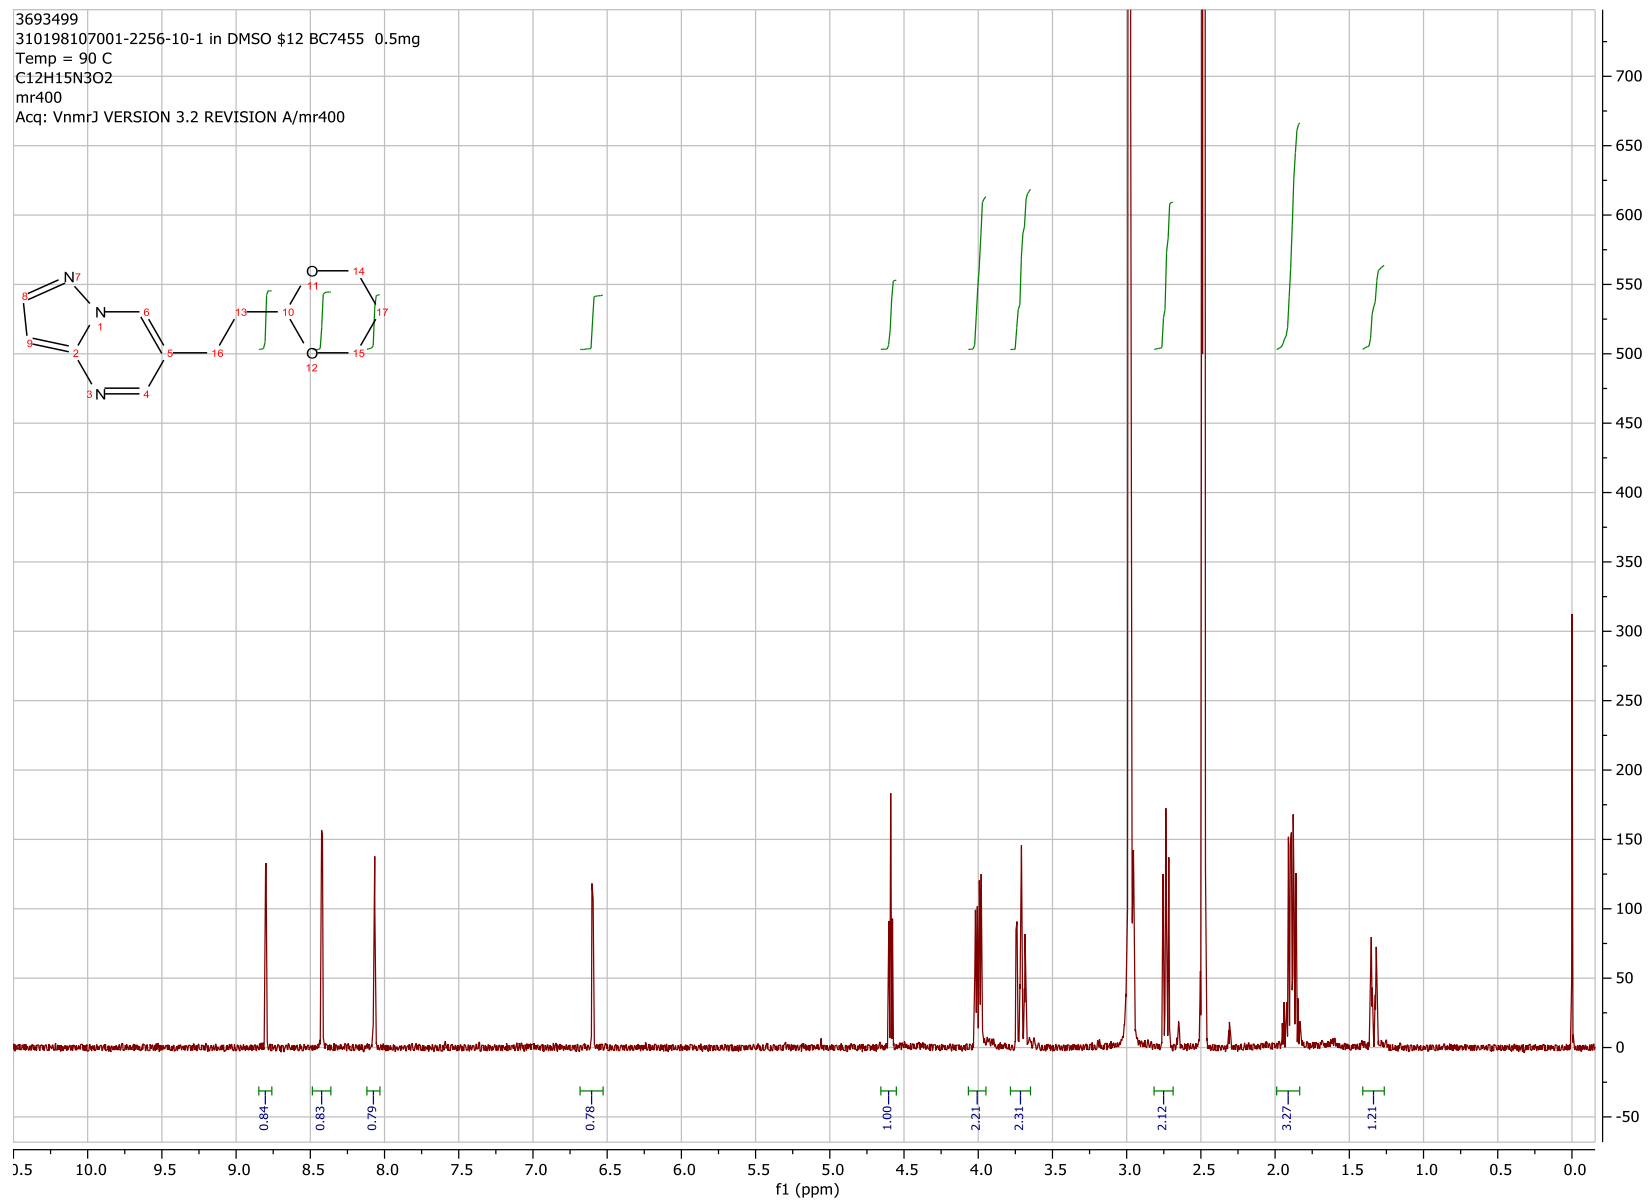

# Compound 130 <sup>13</sup>C NMR

3978534.brk.1.fid  
310198107001-2396-5-1 in DMSO \$13 BC2638 9mg

C12H15N3O  
s400

Acq:topspin3.6.1/s400

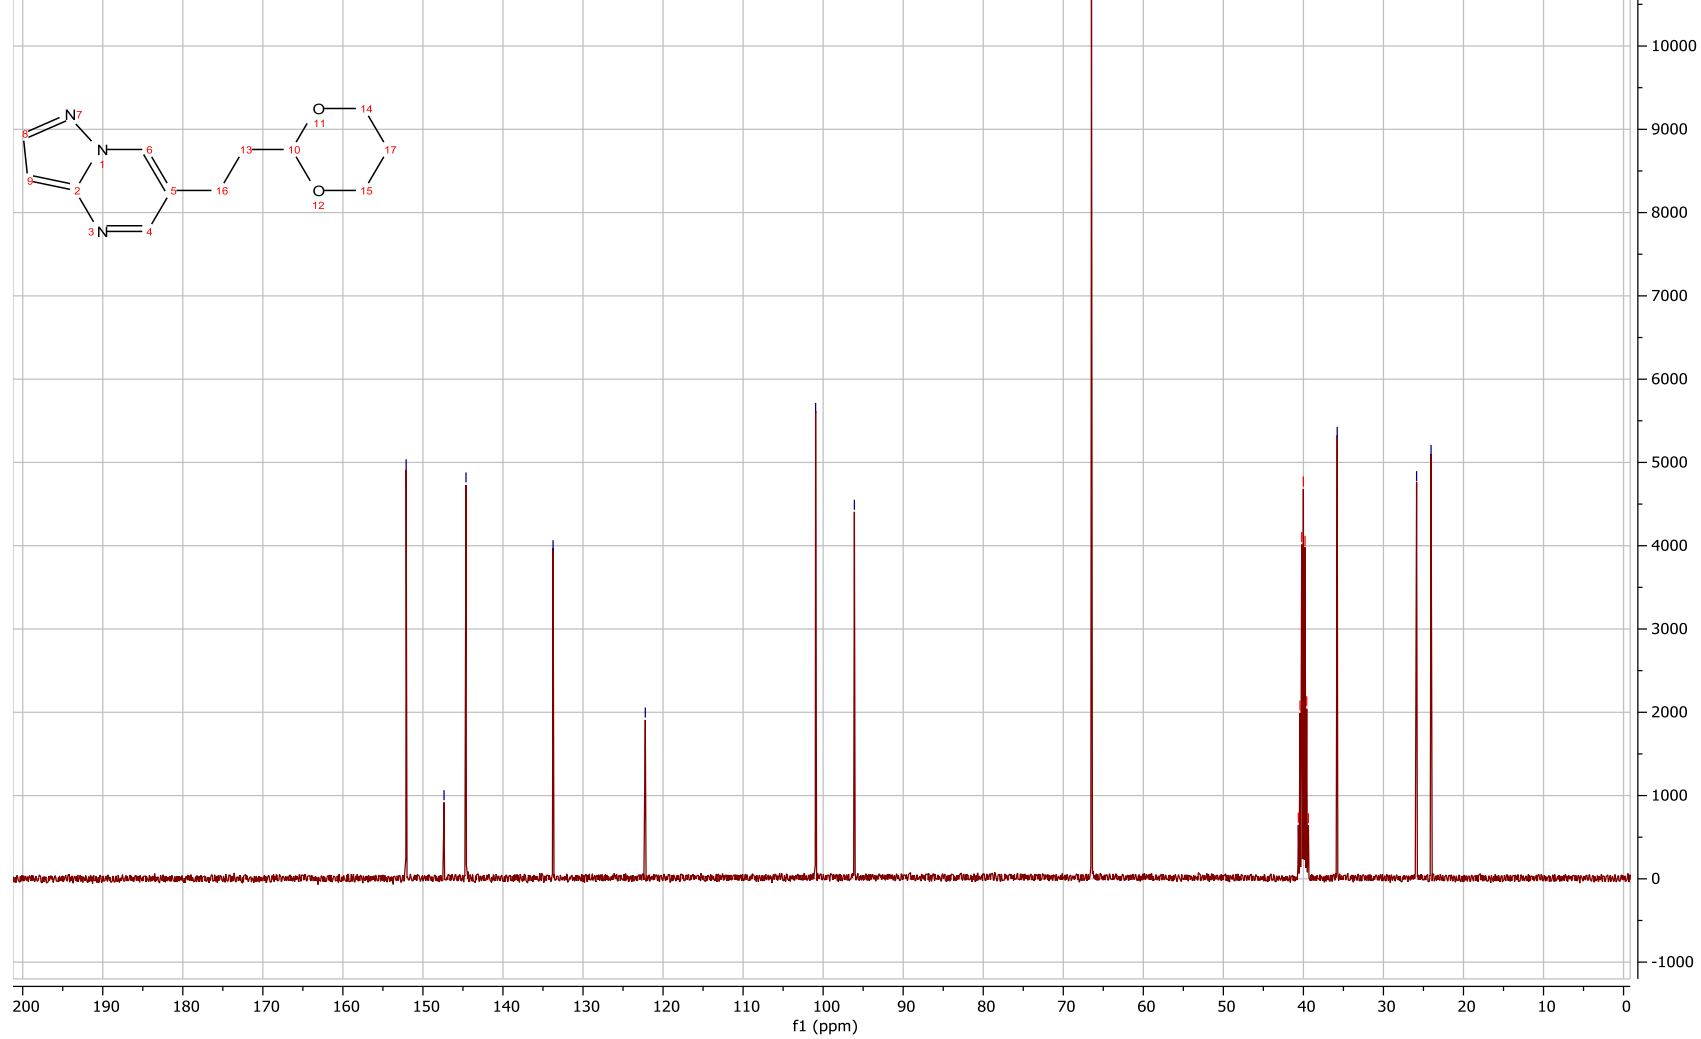

# Compound 130 <sup>1</sup>H NMR

nload\_20201204\_10\_NLL-0-046A.10.fid  
NLL-0-046A  
H1\_standard.UW CDCl3 500 MHz

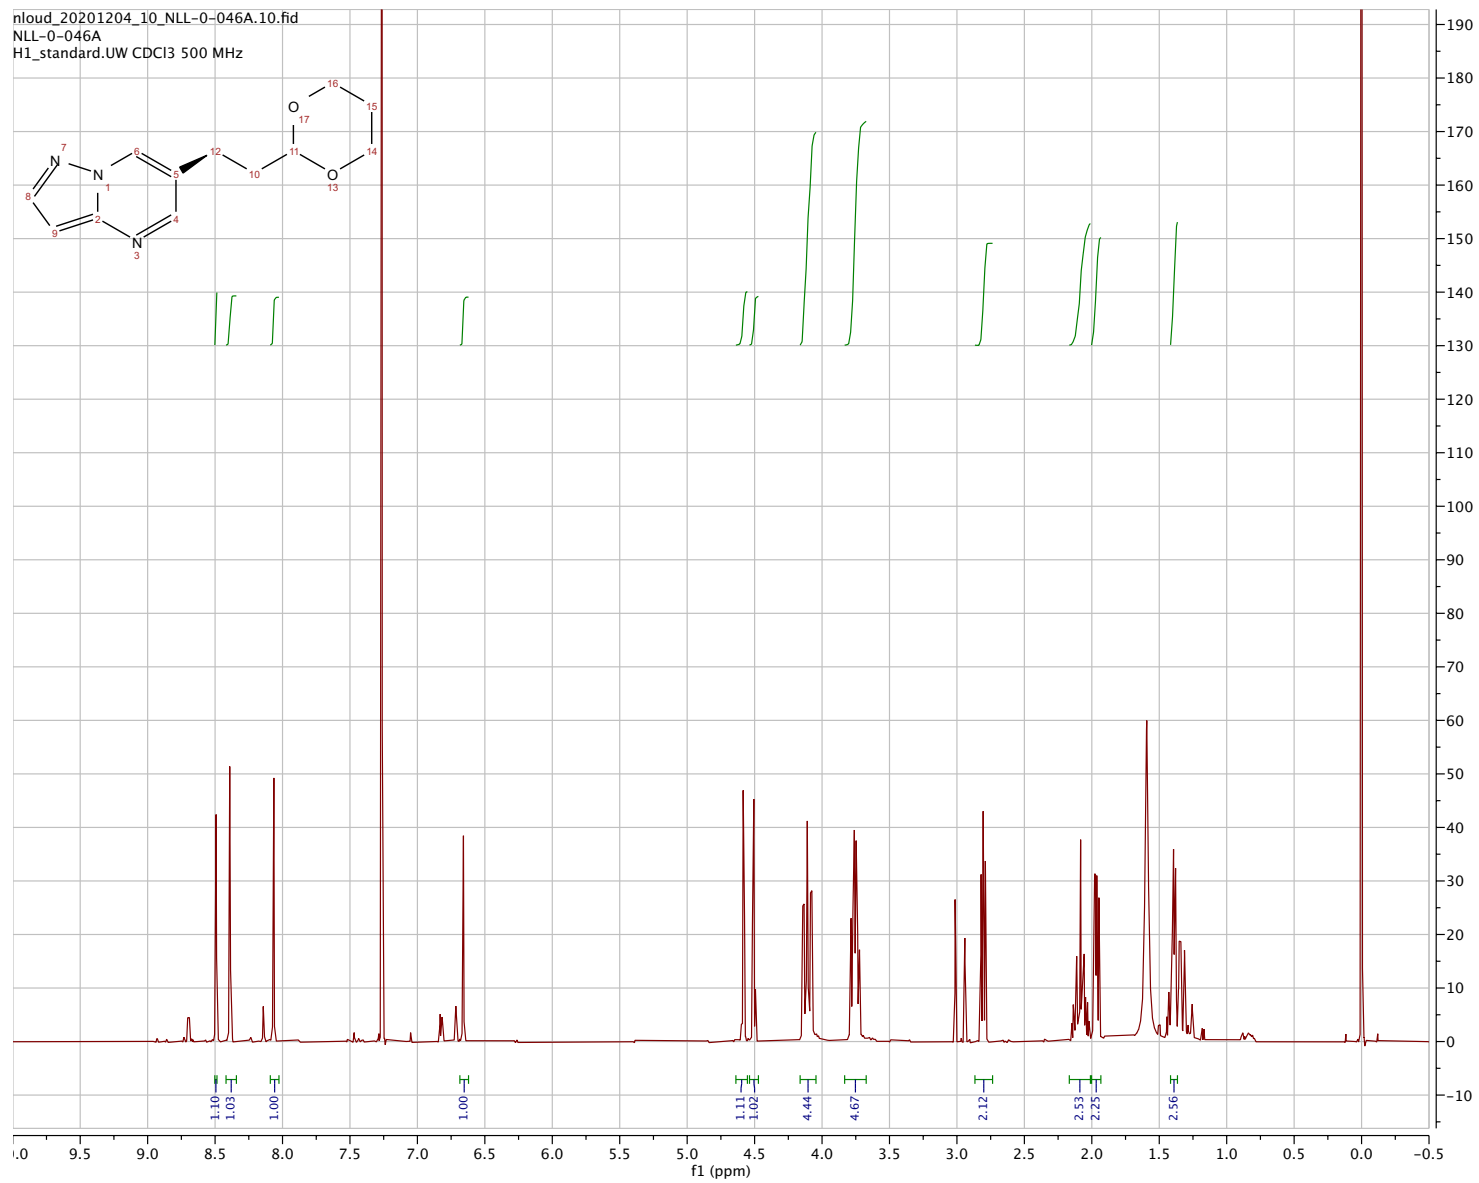

# Compound 130 <sup>13</sup>C NMR

nload\_20201204\_11\_NLL-0-046A.11.fid  
NLL-0-046A  
C13\_standard.UW CDCl3 126 MHz

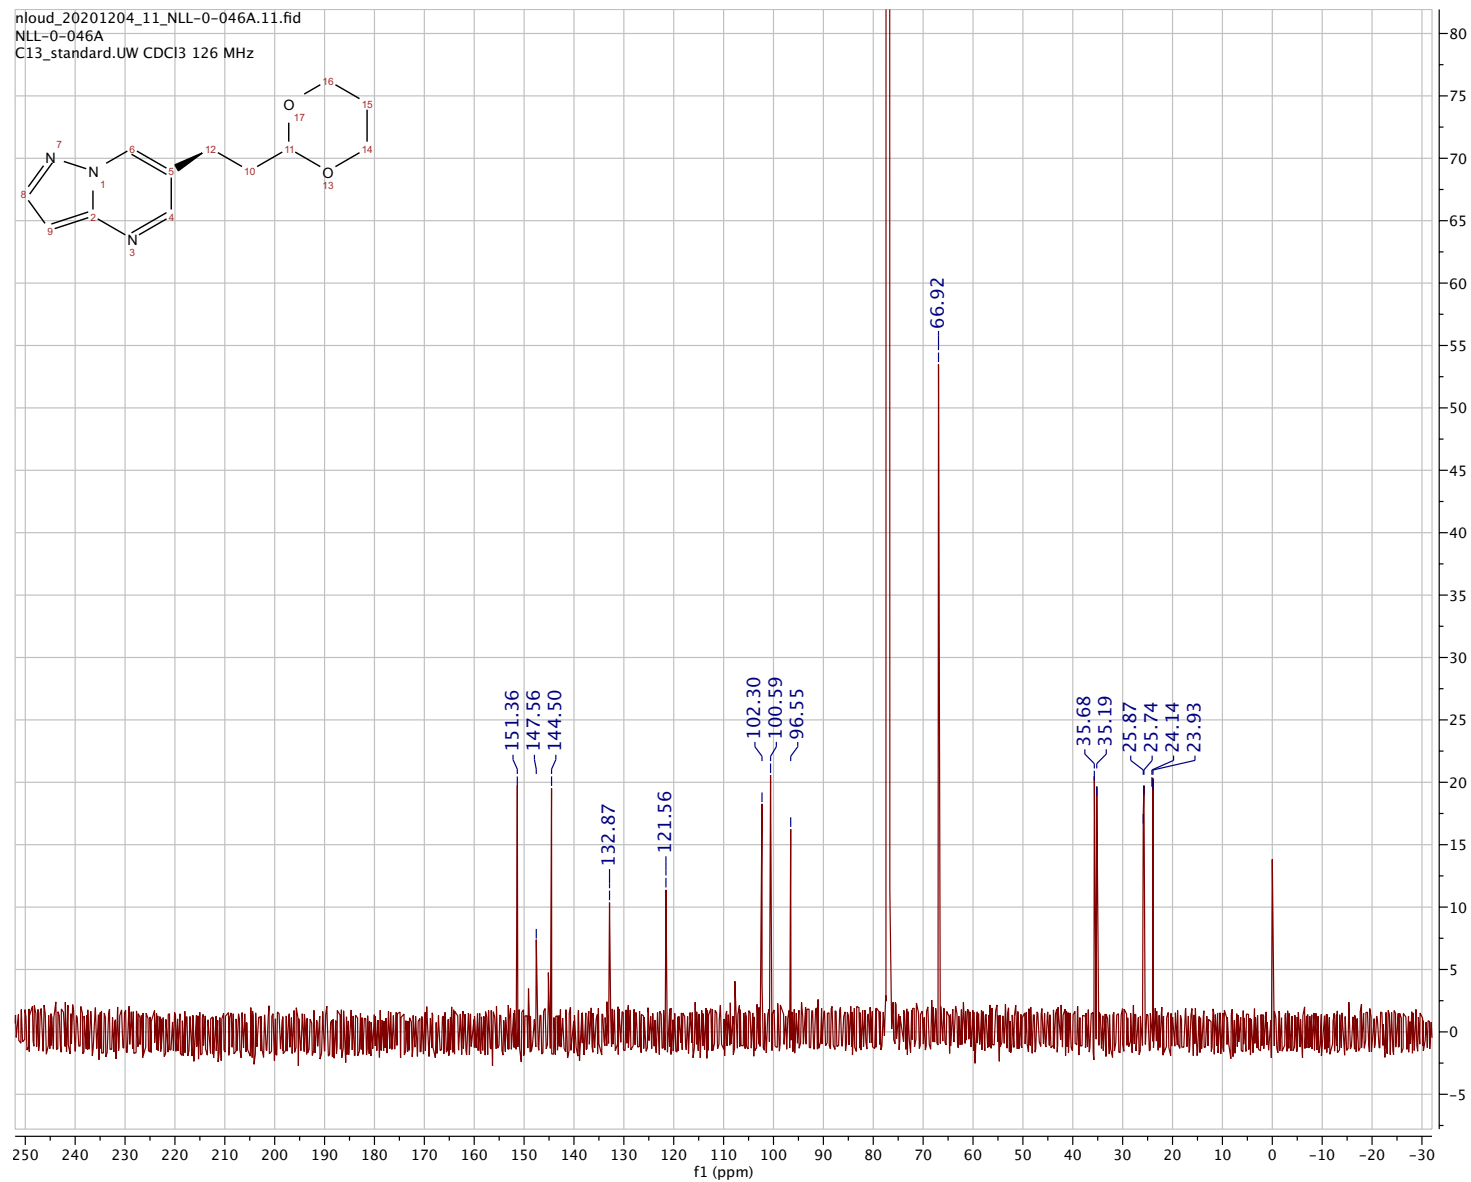

# Compound 139 <sup>1</sup>H NMR

nload\_20201130\_10\_NLL-0-042C.10.fid  
NLL-0-042C  
H1\_standard.UW CDCl3 500 MHz

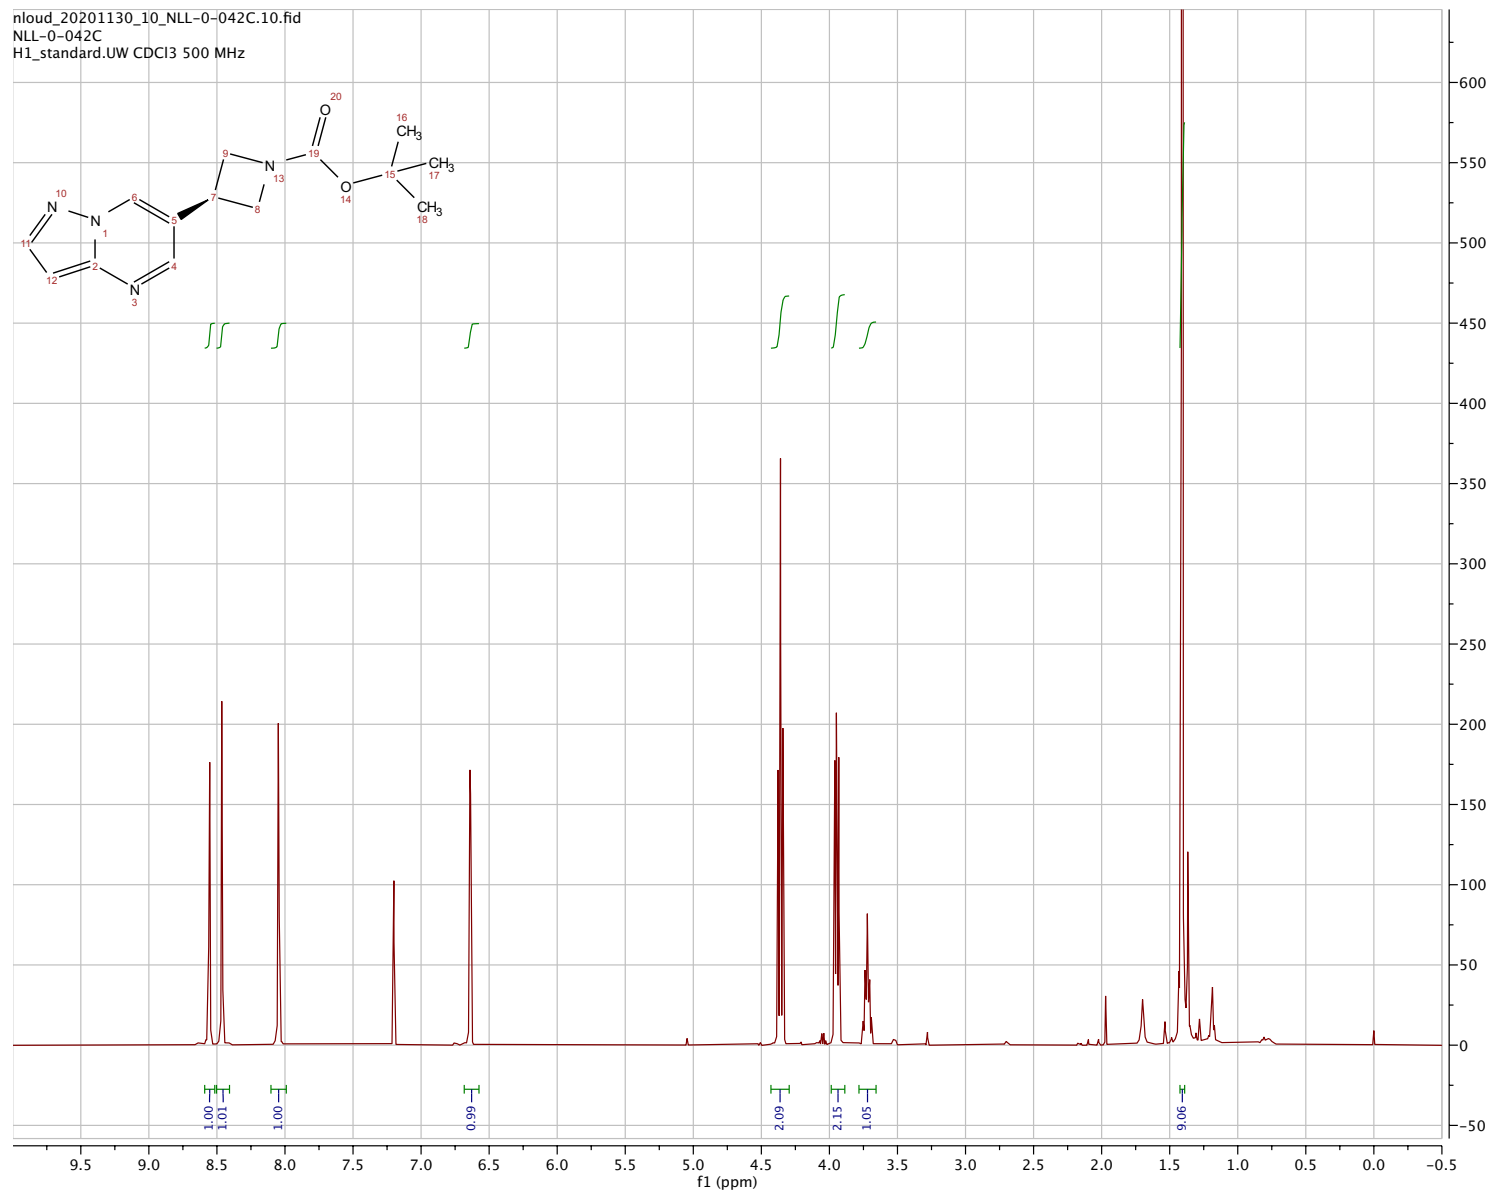

# Compound 139 <sup>13</sup>C NMR

nloud\_20201130\_11\_NLL-0-042C.11.fid  
NLL-0-042C  
C13\_standard.UW CDCl3 126 MHz

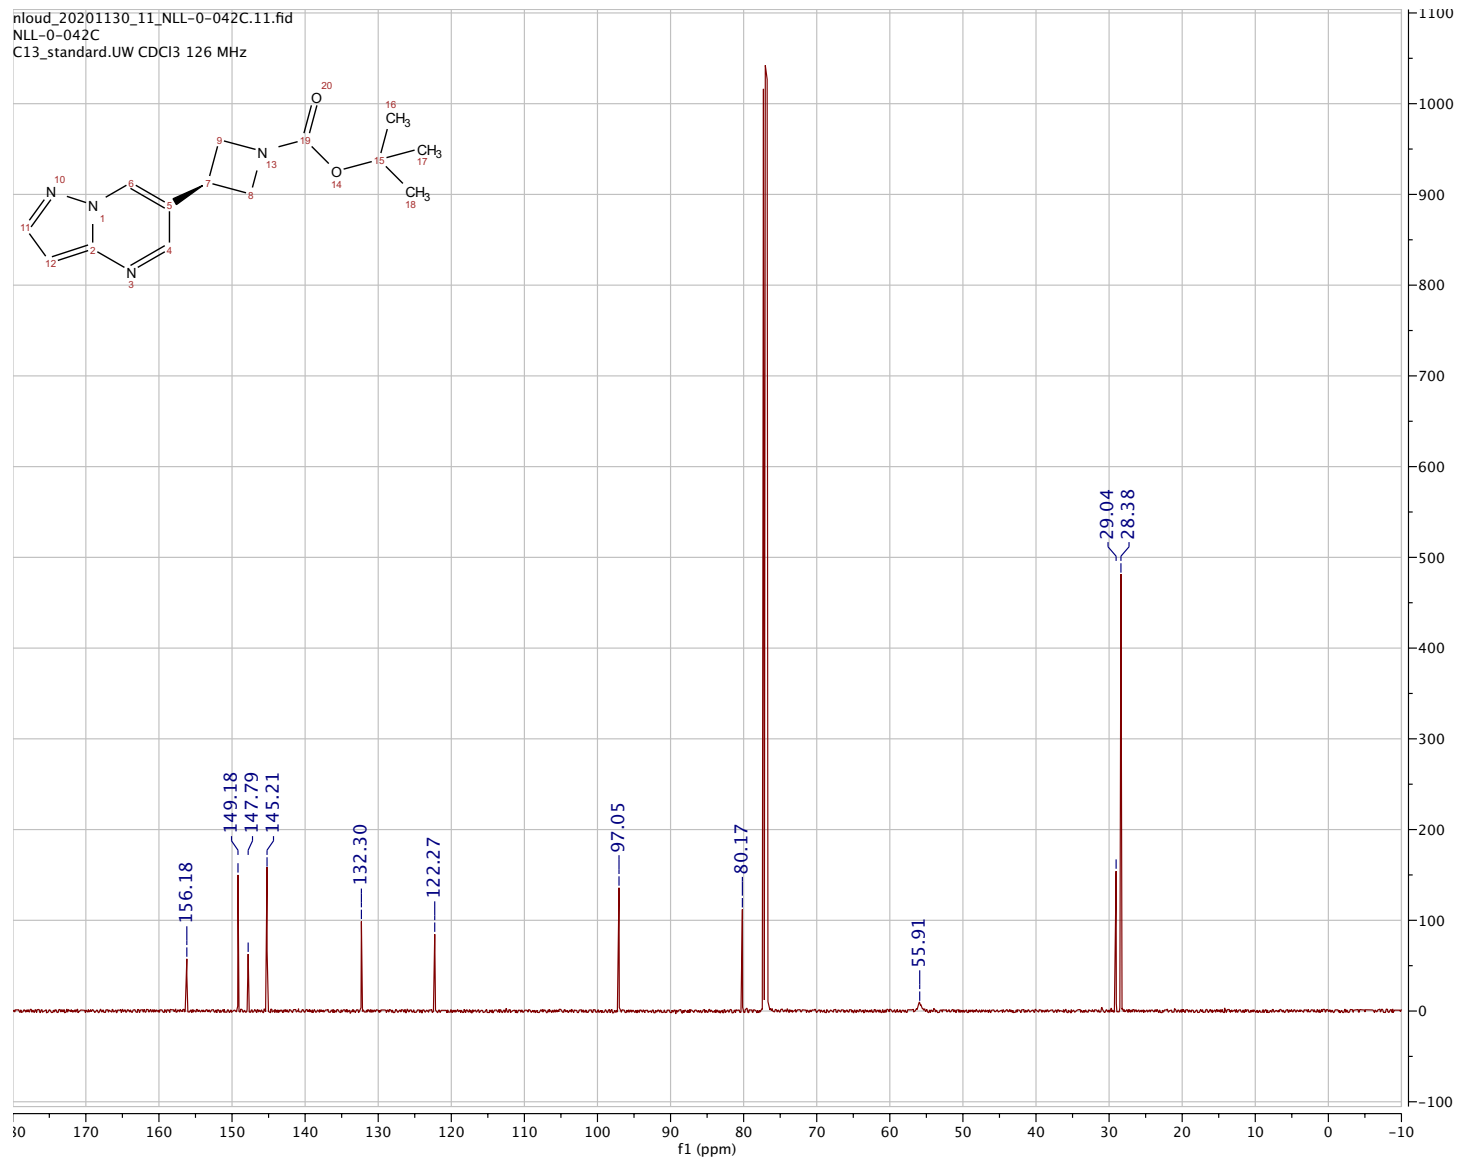



# Compound 148 <sup>1</sup>H NMR

3677682  
310198107001-2228-20-1 in DMSO  $\delta$ 05 BC8688 0.5mg  
Temp = 90 C  
C11H14N4O  
mr400  
Acq: VnmrJ VERSION 3.2 REVISION A/mr400

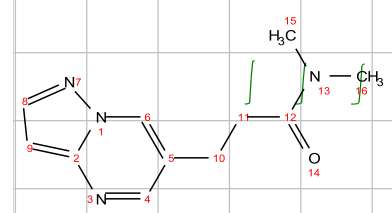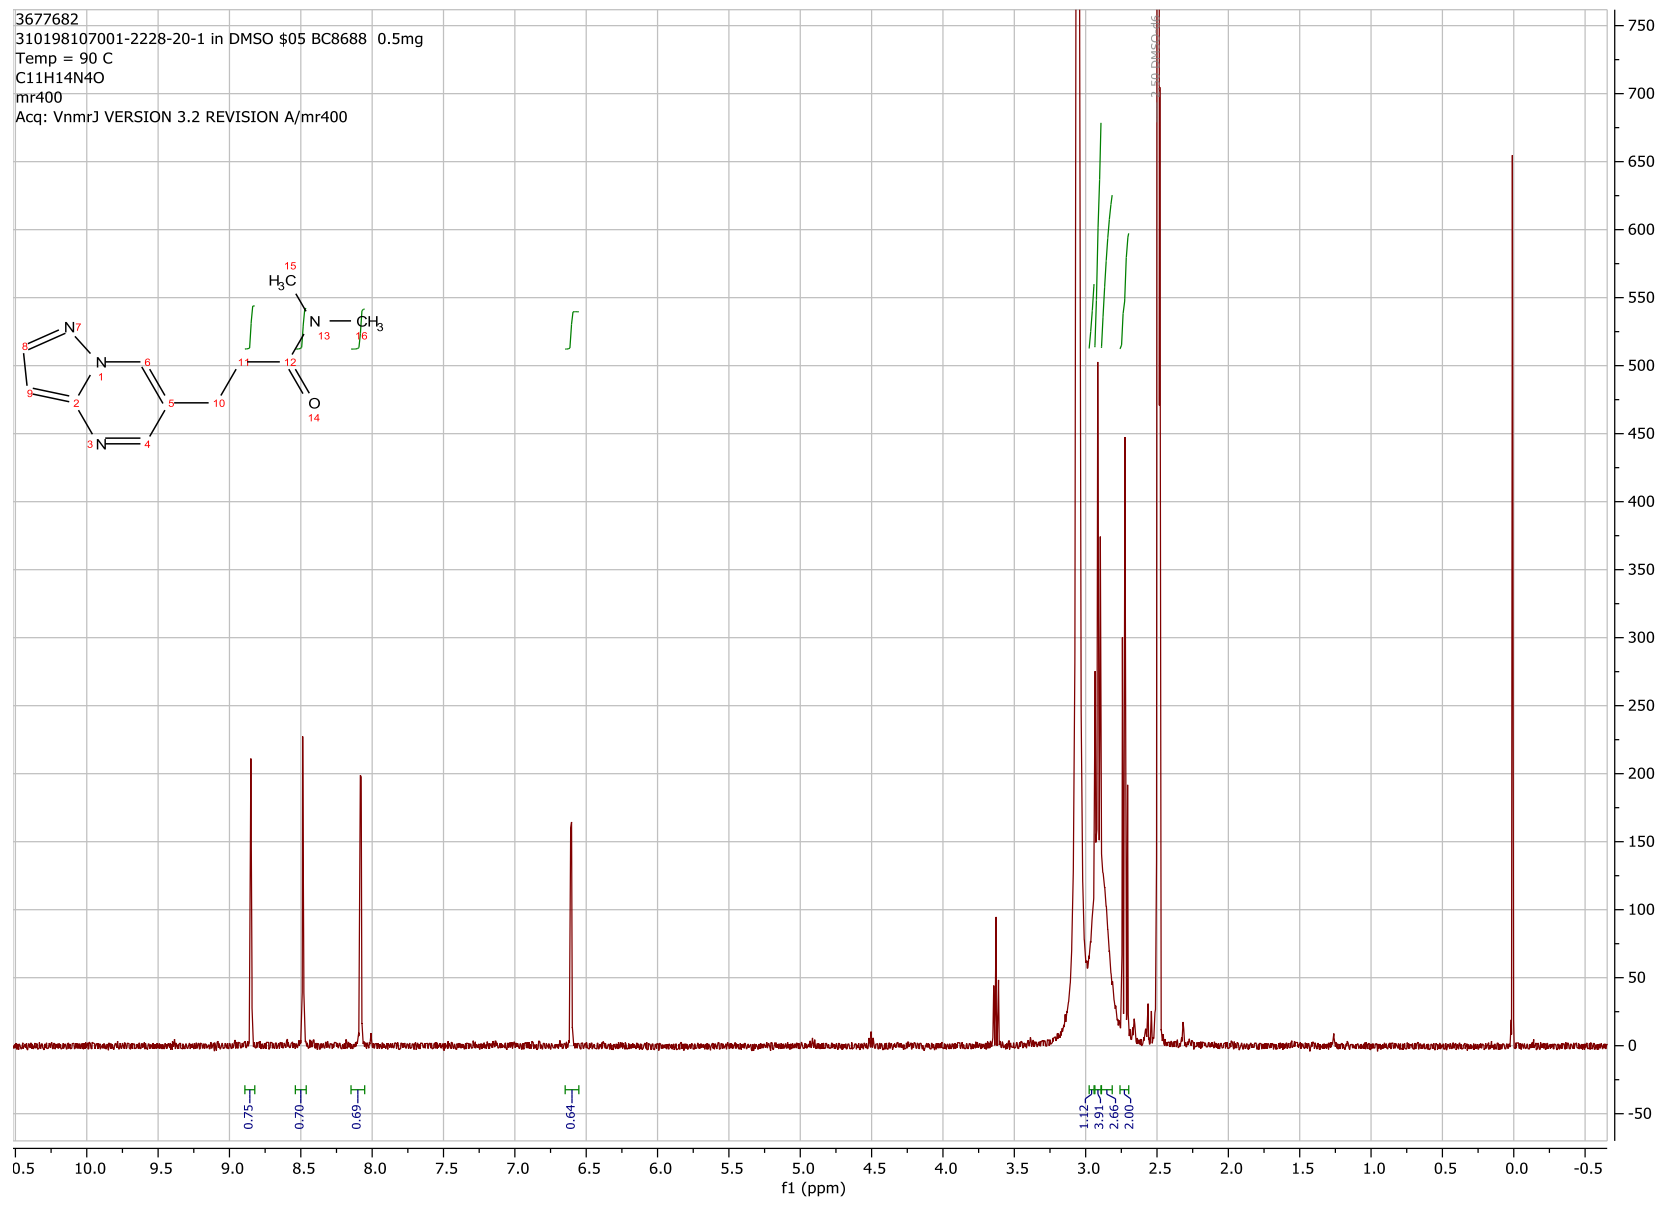

# Compound 148 <sup>13</sup>C NMR

3978056.brk.1.fid

310198107001-2396-6-1 in DMSO \$13 BC2639 9mg

C11H14N4

s400

Acq:topspin3.6.1/s400

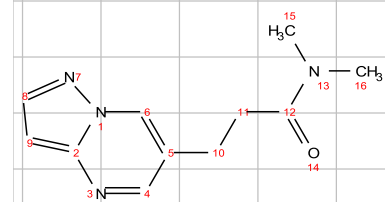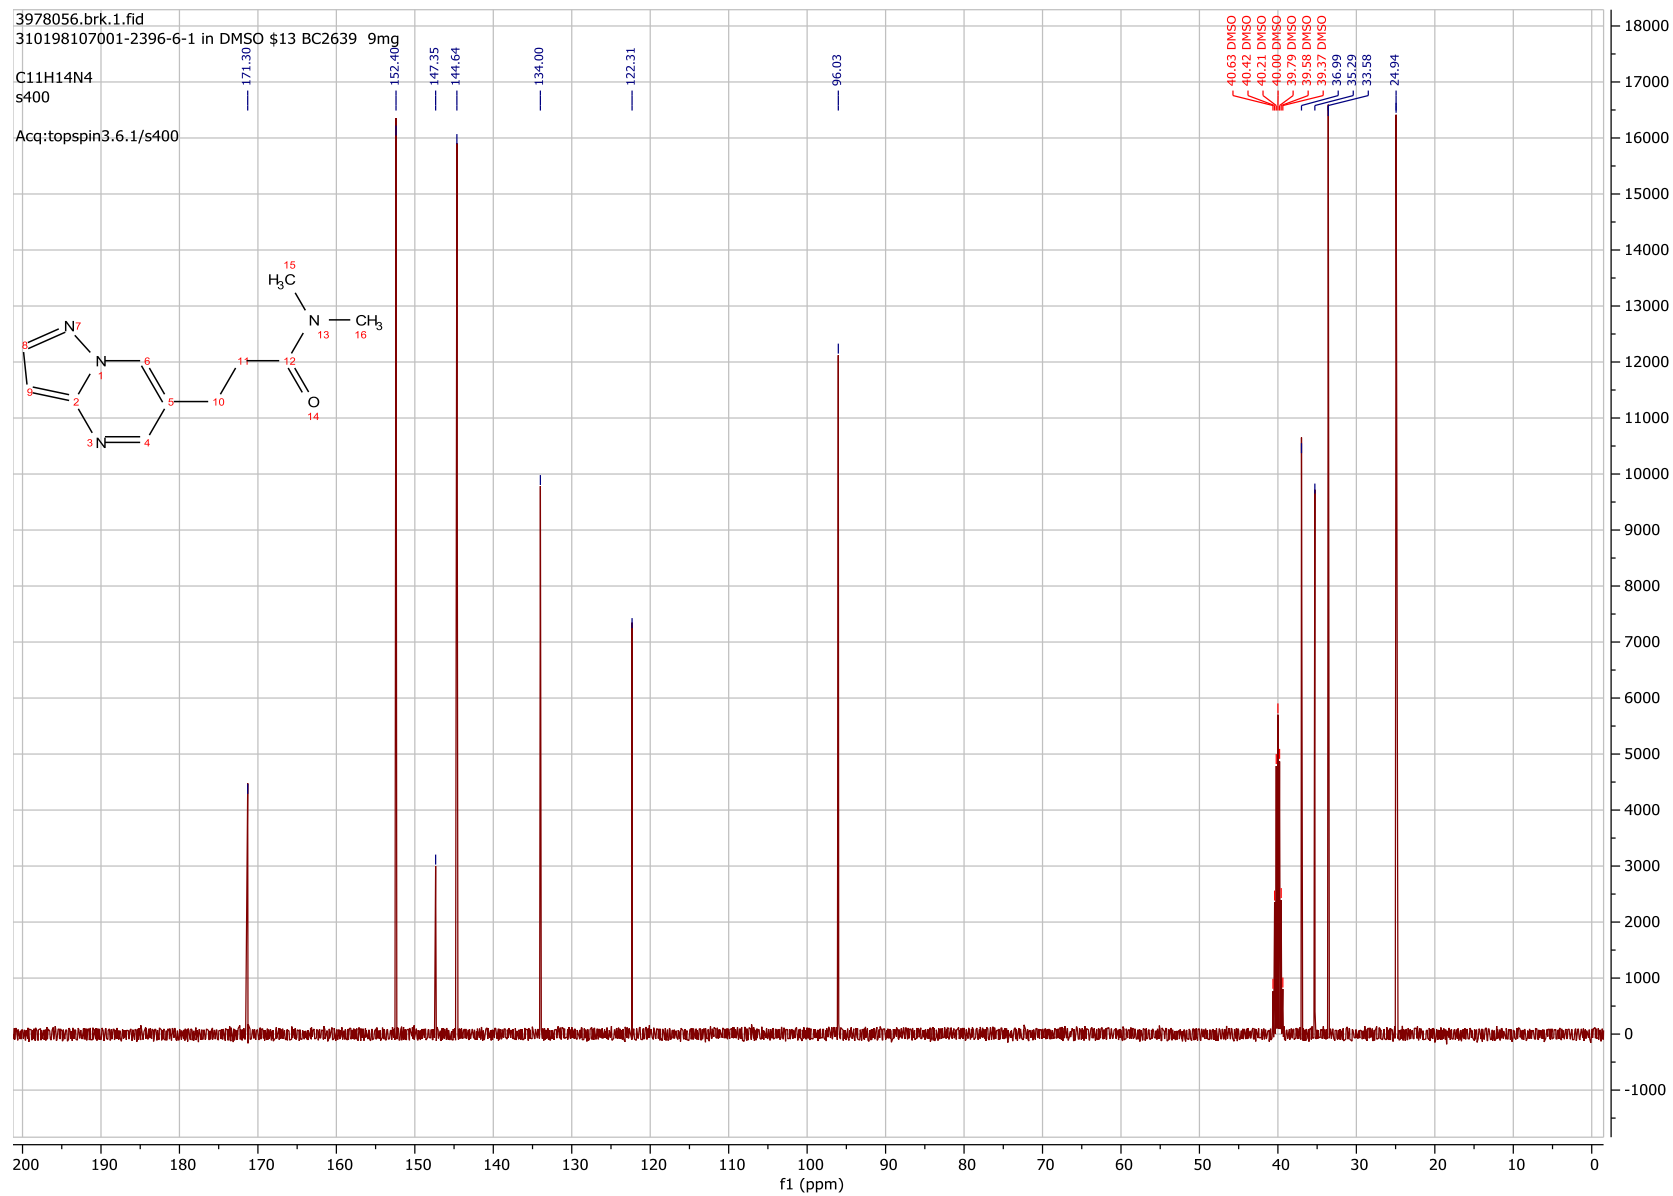

# Compound 153 <sup>1</sup>HNMR

3880092  
310198107001-2367-1-1 in DMSO  $\delta$ 25 BC8795 0.5mg  
Temp = 27 C  
C18H27N3O2  
mrs400  
Acq: VnmrJ VERSION 3.2 REVISION A/mrs400

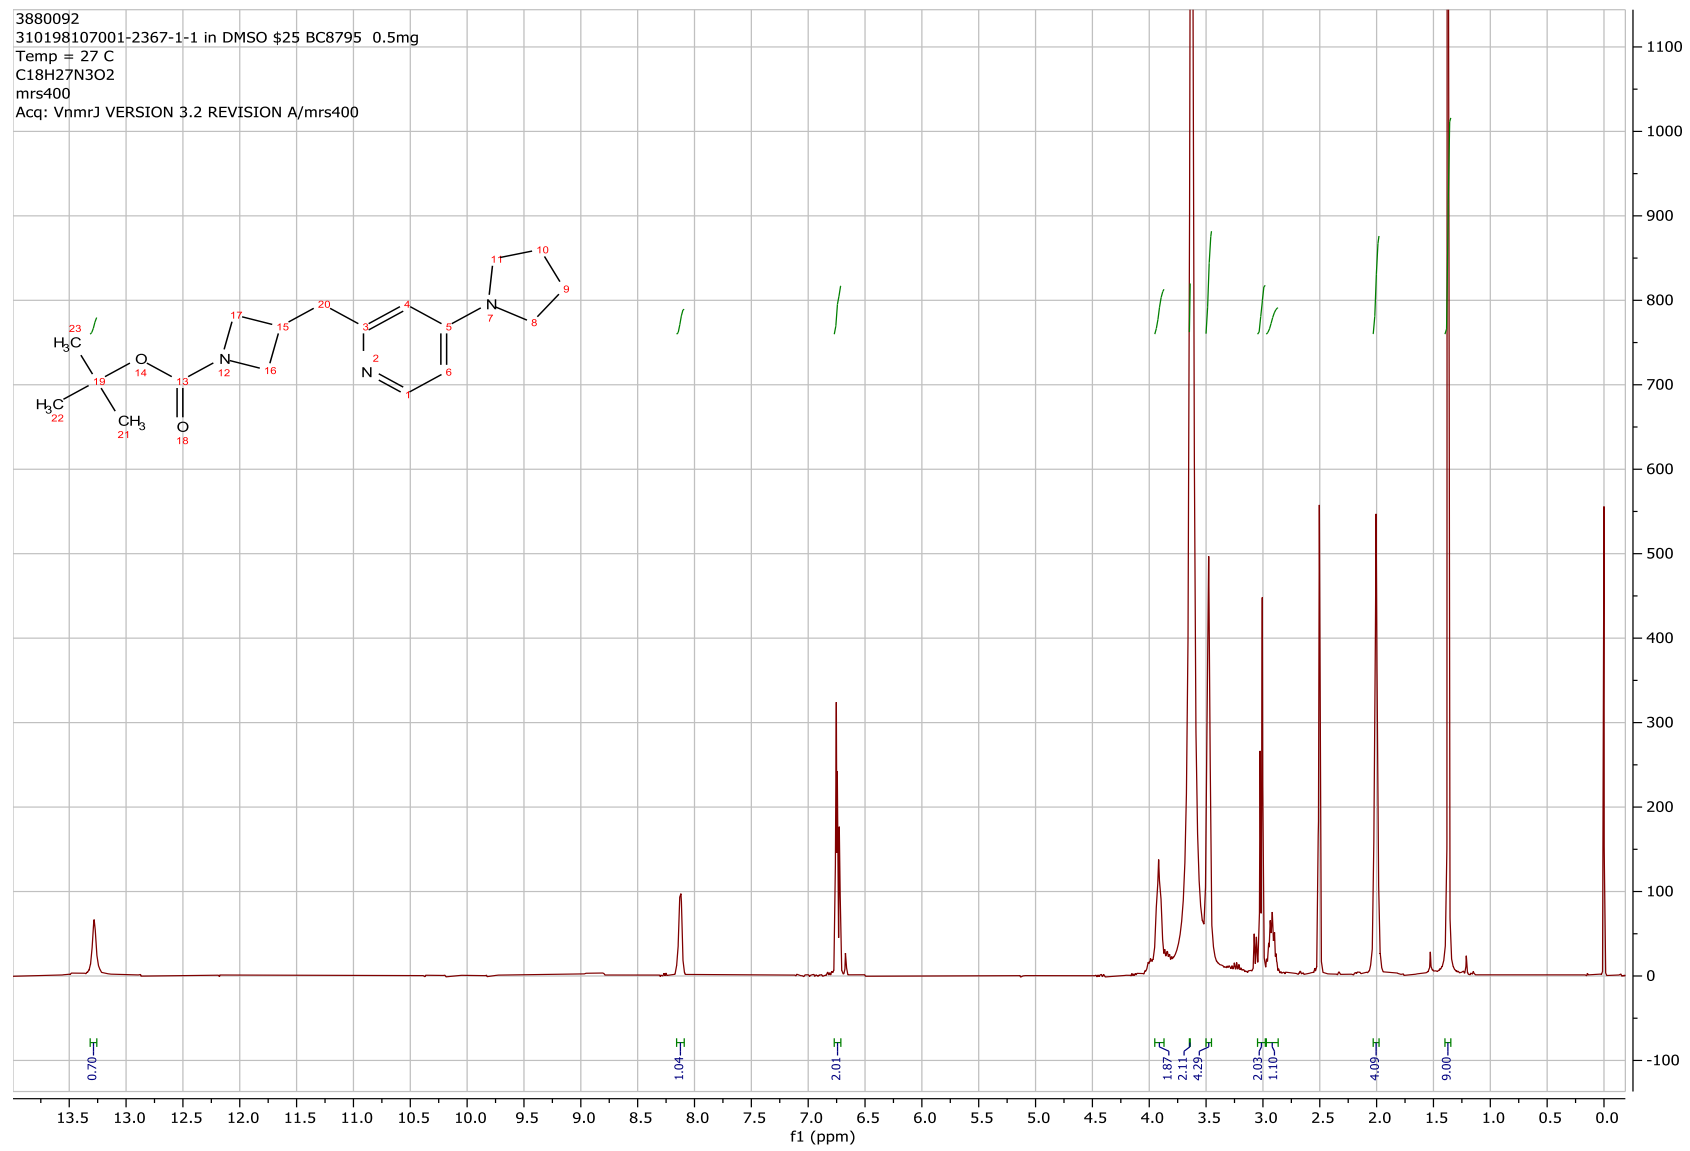

# Compound 153 <sup>13</sup>C NMR

3978284.brk1.fid  
310198107001-2367-1-1 in DMSO \$19 BC2640 9mg

C18H27N3O  
s400

Acq:topspin3.6.1/s400

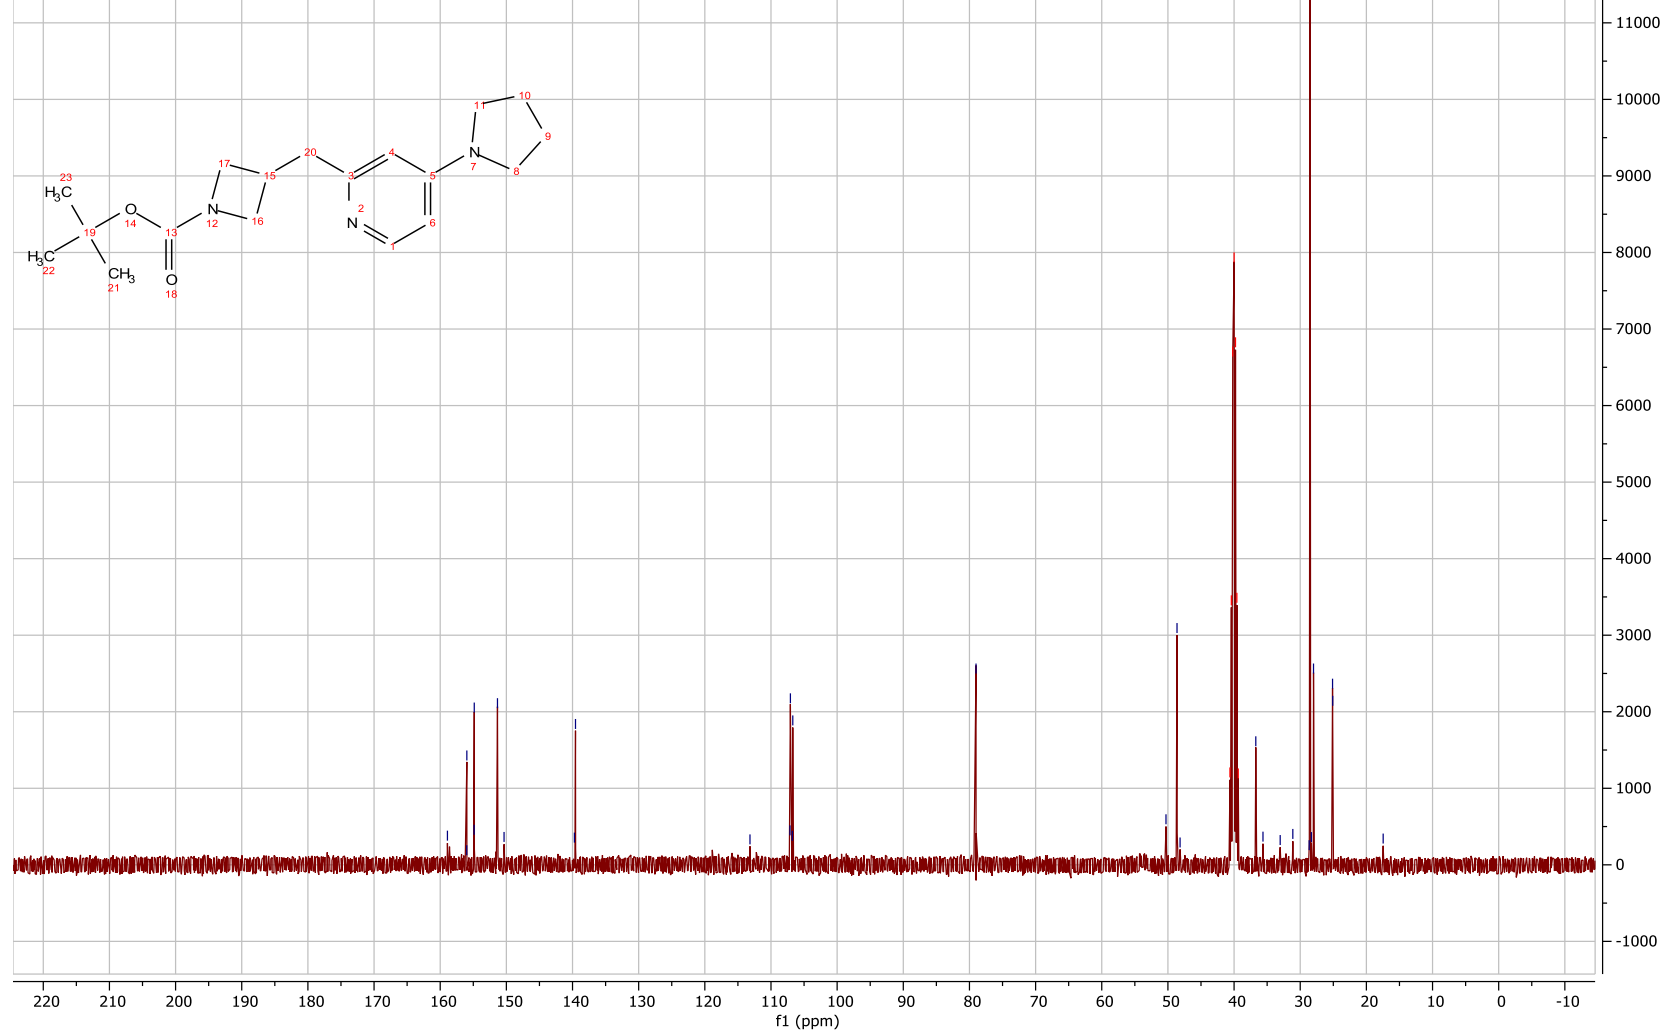

# Compound 165 <sup>1</sup>H NMR

3895284  
310198107001-2373-1-1 in DMSO d6 BC9575 0.5mg  
Temp = 27 C  
C14H20N2  
mrs400  
Acq: VnmrJ VERSION 3.2 REVISION A/mrs400

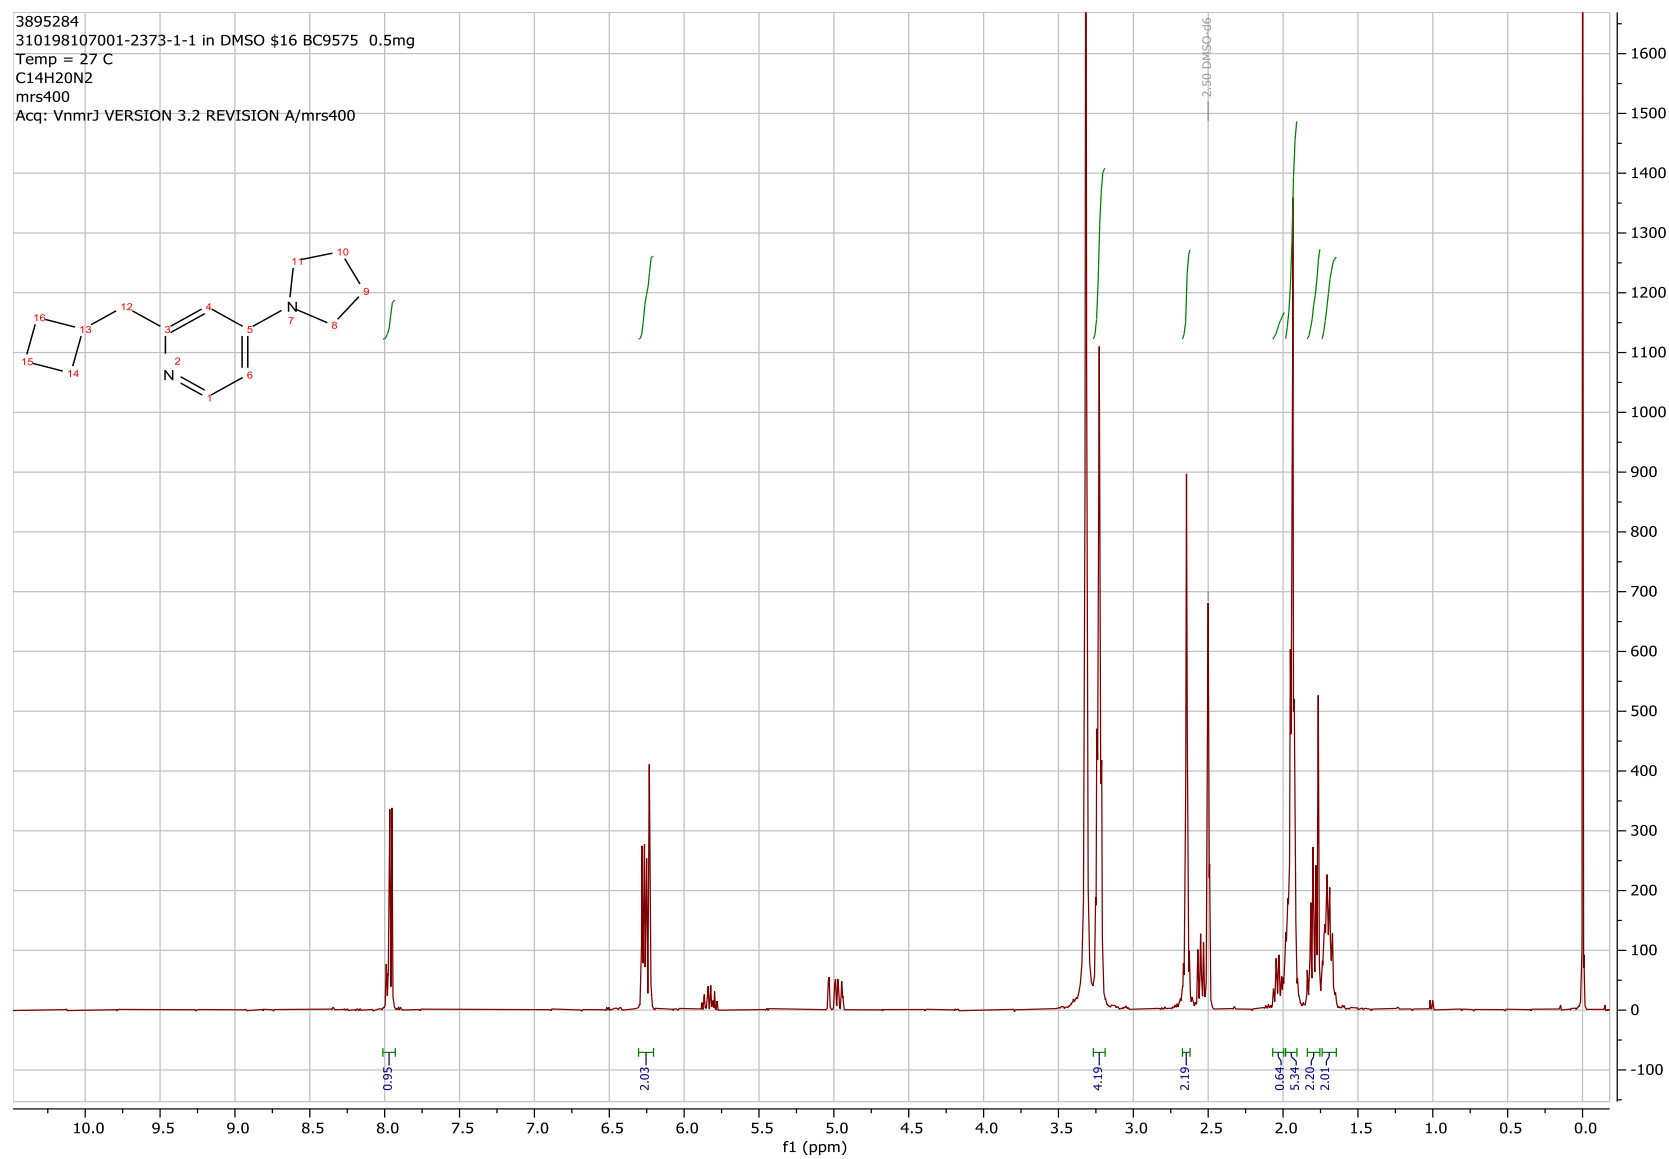

# Compound 165 <sup>13</sup>C NMR

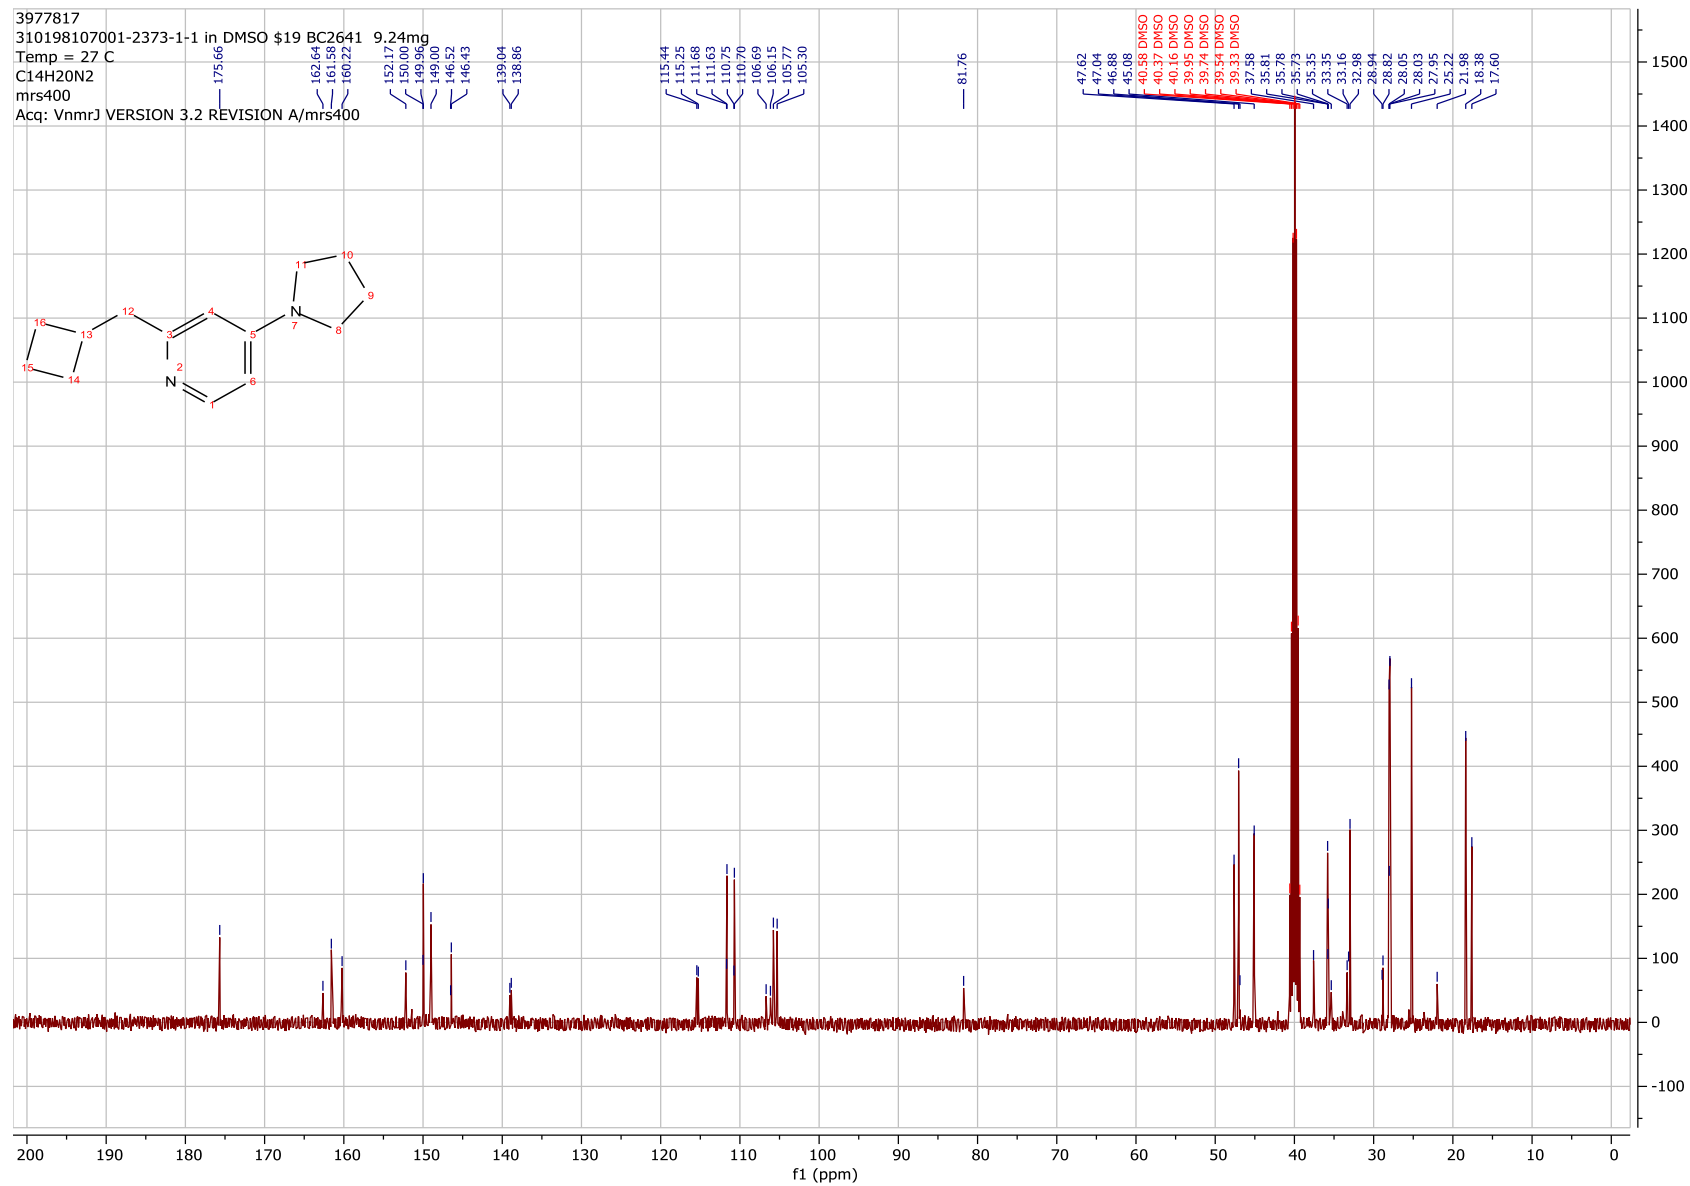

# Compound 170 <sup>1</sup>H NMR

3895296  
310198107001-2373-2-1 in DMSO \$16 BC9576 0.5mg  
Temp = 27 C  
C14H18F2N2  
mrs400  
Acq: VnmrJ VERSION 3.2 REVISION A/mrs400

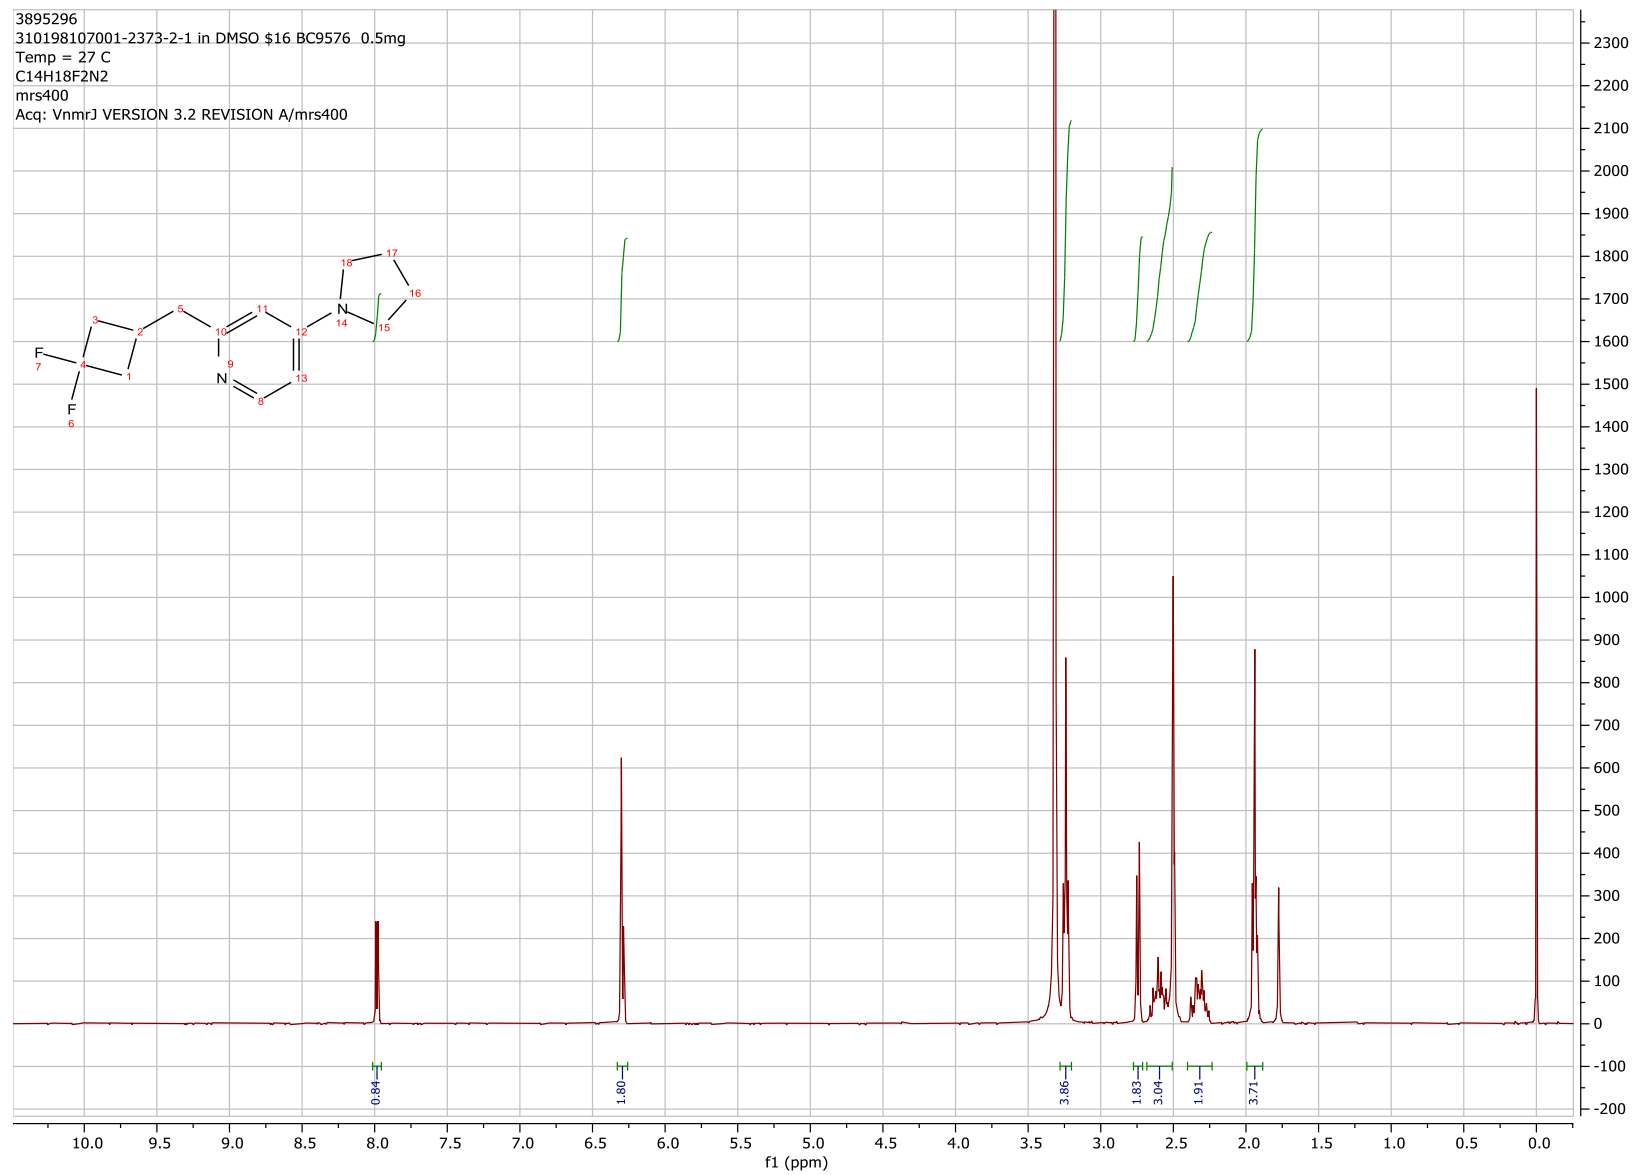

# Compound 170 <sup>13</sup>C NMR

3979643.brk.1.fid  
310198107001-2373-2-1 in DMSO \$20 BC2647 5.19mg

C14H18N2F  
s400

Acq:topspin3.6.1/s400

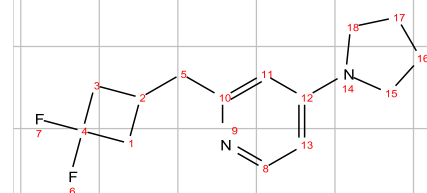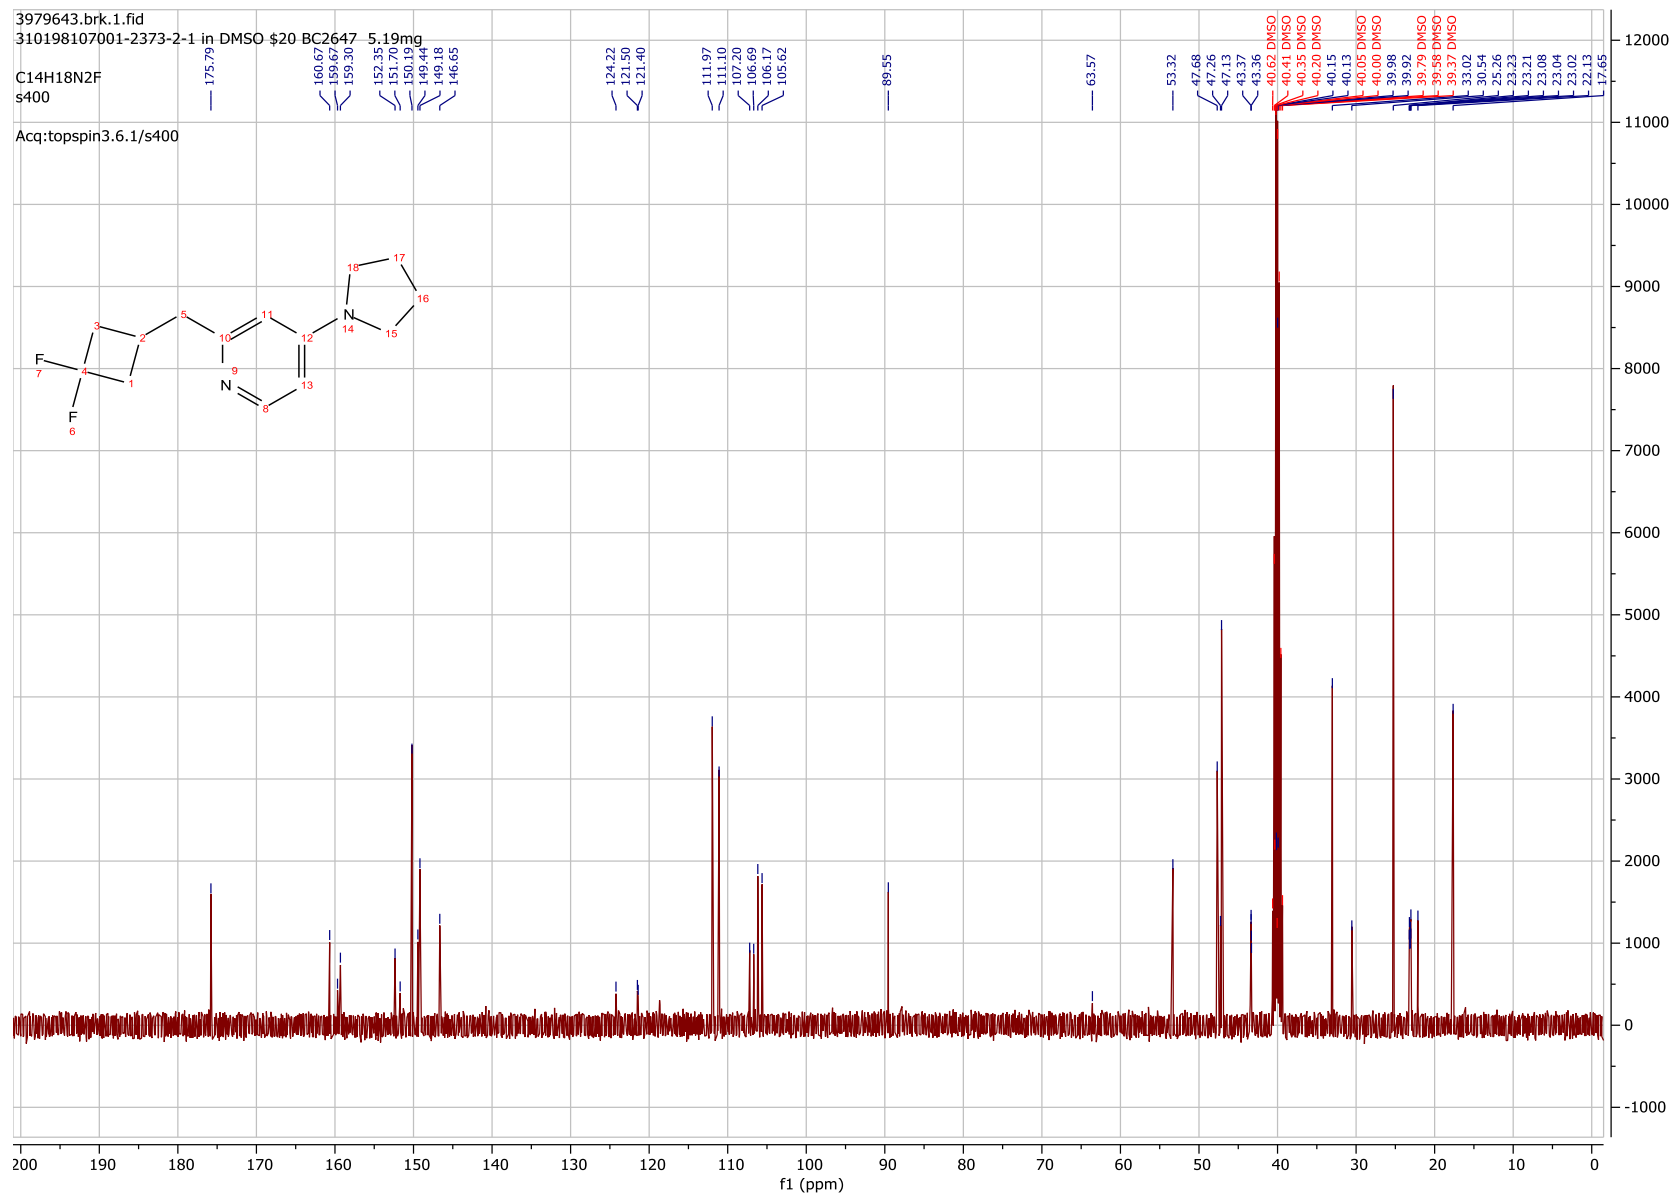



# Compound 181 <sup>1</sup>H NMR

3880119  
310198107001-2367-5-1 in DMSO \$25 BC8804 0.5mg  
Temp = 27 C  
C16H18N2  
mrs400  
Acq: VnmrJ VERSION 3.2 REVISION A/mrs400

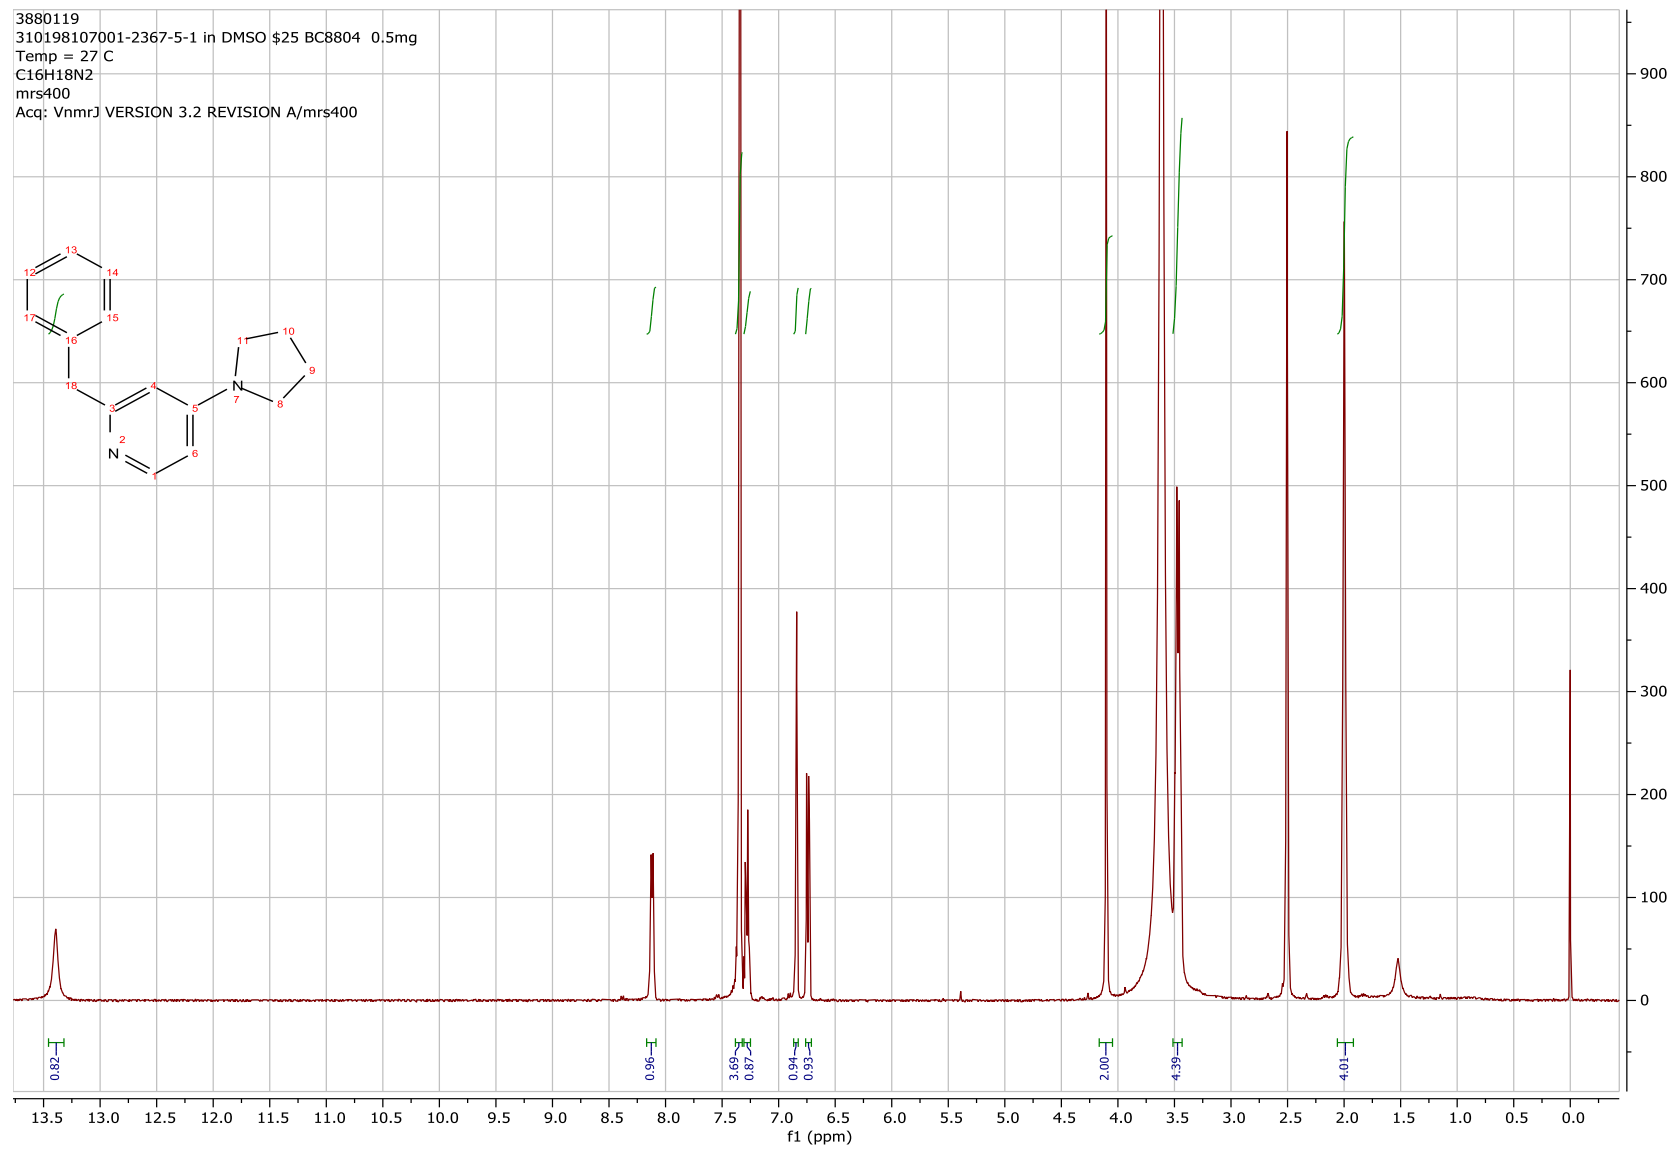

# Compound 181 <sup>13</sup>C NMR

3977978  
310198107001-2367-5-1 in DMSO \$19 BC2642 9.0mg  
Temp = 27 C  
C16H18N2  
mrs400  
Acq: VnmrJ VERSION 3.2 REVISION A/mrs400

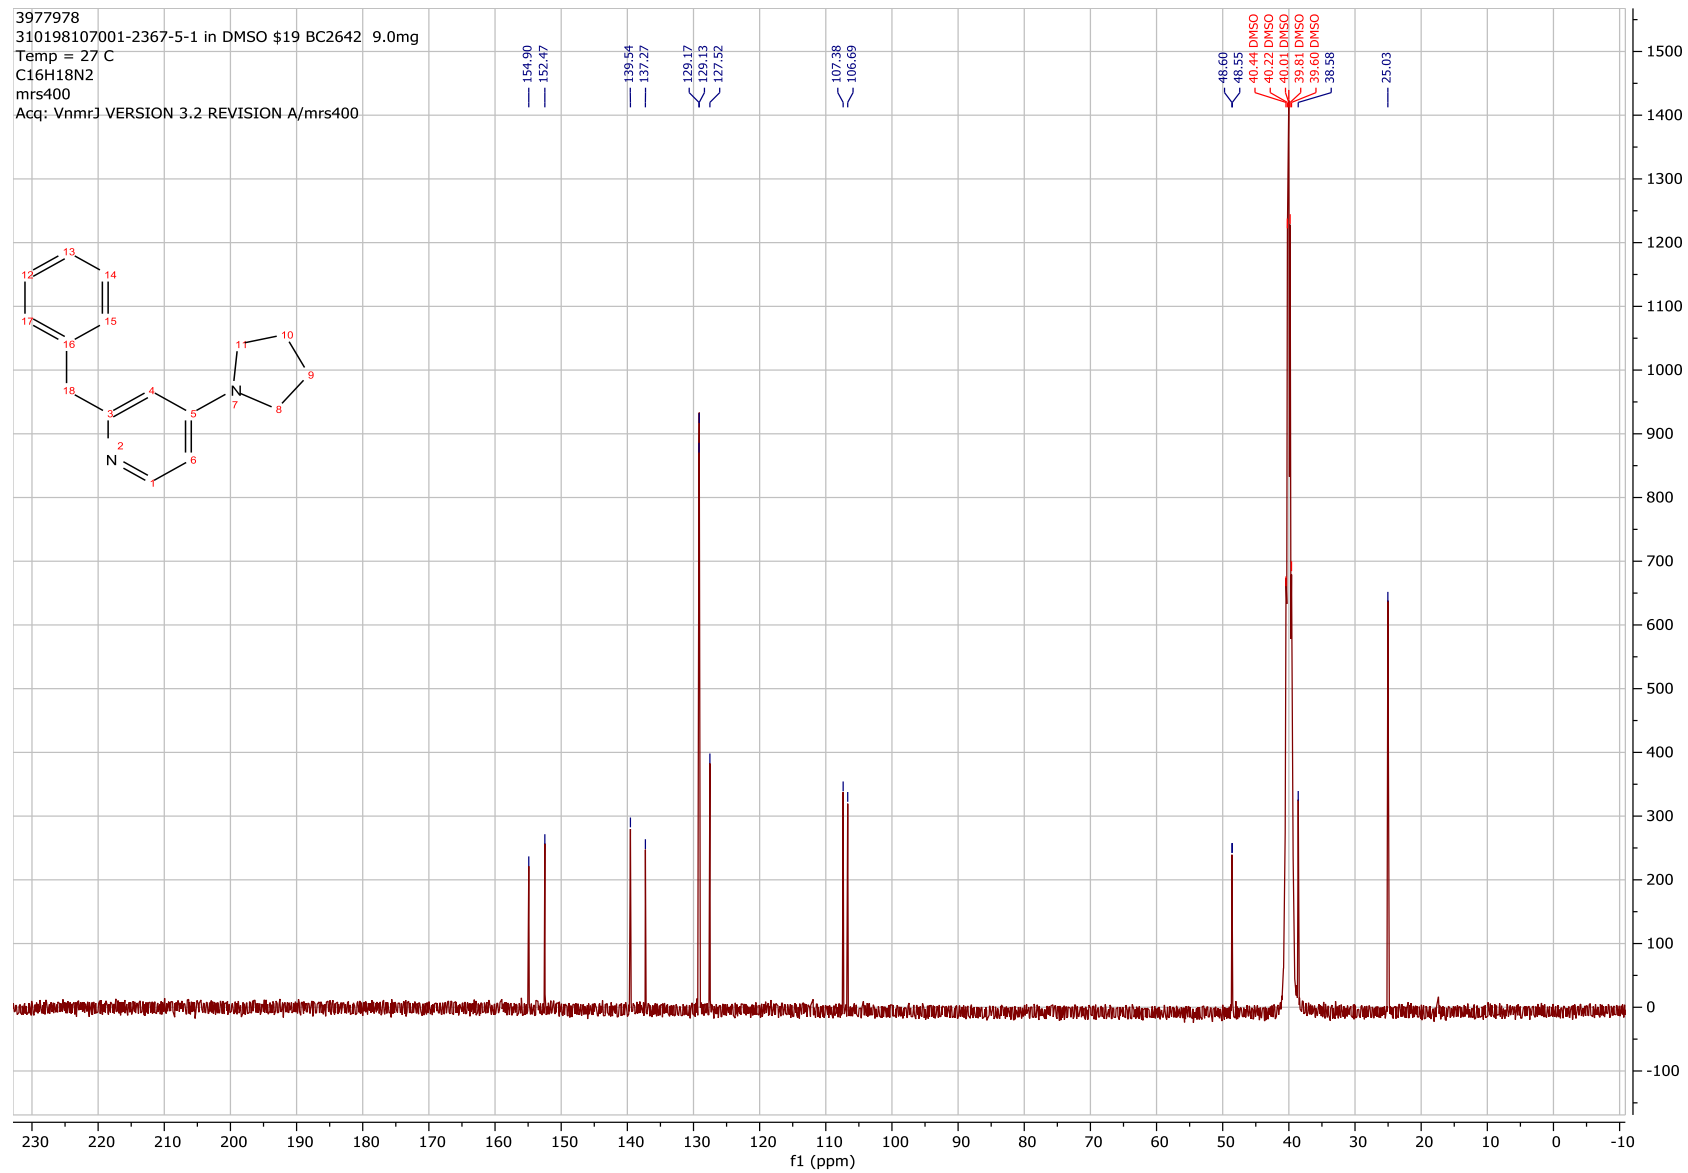

Supplement: NIHMS1737435-supplement-supinfo.pdf [file NIHMS1737435-supplement-supinfo.pdf]
